# Supplementary material for: Acute kidney injury in patients with COVID-19 in the intensive care unit: evaluation of risk factors and mortality in a national cohort
Source: PubMed Central journal article supplement — BMJ Open. 2022 Jun 22;12(6):e059046. doi: 10.1136/bmjopen-2021-059046 (PMC9226471; doi:10.1136/bmjopen-2021-059046), 2022-06-22
Supplement: bmjopen-2021-059046.draft_revisions.pdf [file bmjopen-2021-059046.draft_revisions.pdf]

# BMJ Open

BMJ Open is committed to open peer review. As part of this commitment we make the peer review history of every article we publish publicly available.

When an article is published we post the peer reviewers' comments and the authors' responses online. We also post the versions of the paper that were used during peer review. These are the versions that the peer review comments apply to.

The versions of the paper that follow are the versions that were submitted during the peer review process. They are not the versions of record or the final published versions. They should not be cited or distributed as the published version of this manuscript.

BMJ Open is an open access journal and the full, final, typeset and author-corrected version of record of the manuscript is available on our site with no access controls, subscription charges or pay-per-view fees (<http://bmjopen.bmj.com>).

If you have any questions on BMJ Open's open peer review process please email [info.bmjopen@bmj.com](mailto:info.bmjopen@bmj.com)

# BMJ Open

## Acute Kidney Injury in COVID-19 patients in the Intensive Care Unit. Evaluation of risk factors and mortality in a national cohort.

|                               |                                                                                                                                                                                                                                                                                                                                                                                                                                                                                                                                                                                                                                                                                                                 |
|-------------------------------|-----------------------------------------------------------------------------------------------------------------------------------------------------------------------------------------------------------------------------------------------------------------------------------------------------------------------------------------------------------------------------------------------------------------------------------------------------------------------------------------------------------------------------------------------------------------------------------------------------------------------------------------------------------------------------------------------------------------|
| Journal:                      | <i>BMJ Open</i>                                                                                                                                                                                                                                                                                                                                                                                                                                                                                                                                                                                                                                                                                                 |
| Manuscript ID                 | bmjopen-2021-059046                                                                                                                                                                                                                                                                                                                                                                                                                                                                                                                                                                                                                                                                                             |
| Article Type:                 | Original research                                                                                                                                                                                                                                                                                                                                                                                                                                                                                                                                                                                                                                                                                               |
| Date Submitted by the Author: | 05-Nov-2021                                                                                                                                                                                                                                                                                                                                                                                                                                                                                                                                                                                                                                                                                                     |
| Complete List of Authors:     | Aukland, Eirik; Norwegian University of Science and Technology, Faculty of Medicine and Health Sciences<br>Klepstad, Pål; Norwegian University of Science and Technology, Department of Circulation and Medical Imaging; St Olavs Hospital Trondheim University Hospital, Department of Anesthesia and Intensive Care Medicine<br>Aukland, Stein Magnus; Haukeland University Hospital, Department of Radiology; University of Bergen, Department of Clinical Medicine<br>Ghavidel, Fatemeh; Haukeland University Hospital, Department of Research and Development<br>Buanes, Eirik; Norwegian Intensive Care and Pandemic Registry; Haukeland University Hospital, Department of Anesthesia and Intensive Care |
| Keywords:                     | COVID-19, Acute renal failure < NEPHROLOGY, Adult intensive & critical care < INTENSIVE & CRITICAL CARE                                                                                                                                                                                                                                                                                                                                                                                                                                                                                                                                                                                                         |
|                               |                                                                                                                                                                                                                                                                                                                                                                                                                                                                                                                                                                                                                                                                                                                 |

SCHOLARONE™  
Manuscripts

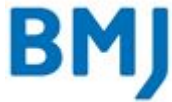

I, the Submitting Author has the right to grant and does grant on behalf of all authors of the Work (as defined in the below author licence), an exclusive licence and/or a non-exclusive licence for contributions from authors who are: i) UK Crown employees; ii) where BMJ has agreed a CC-BY licence shall apply, and/or iii) in accordance with the terms applicable for US Federal Government officers or employees acting as part of their official duties; on a worldwide, perpetual, irrevocable, royalty-free basis to BMJ Publishing Group Ltd ("BMJ") its licensees and where the relevant Journal is co-owned by BMJ to the co-owners of the Journal, to publish the Work in this journal and any other BMJ products and to exploit all rights, as set out in our [licence](#).

The Submitting Author accepts and understands that any supply made under these terms is made by BMJ to the Submitting Author unless you are acting as an employee on behalf of your employer or a postgraduate student of an affiliated institution which is paying any applicable article publishing charge ("APC") for Open Access articles. Where the Submitting Author wishes to make the Work available on an Open Access basis (and intends to pay the relevant APC), the terms of reuse of such Open Access shall be governed by a Creative Commons licence – details of these licences and which [Creative Commons](#) licence will apply to this Work are set out in our licence referred to above.

Other than as permitted in any relevant BMJ Author's Self Archiving Policies, I confirm this Work has not been accepted for publication elsewhere, is not being considered for publication elsewhere and does not duplicate material already published. I confirm all authors consent to publication of this Work and authorise the granting of this licence.

1  
2  
3 Long title:  
4

5 Acute Kidney Injury in COVID-19 patients in the Intensive Care  
6 Unit. Evaluation of risk factors and mortality in a national cohort.  
7  
8

9  
10  
11 Short title: Acute Kidney Injury in ICU-treated COVID-19 patients.  
12

13  
14 Eirik Aasen Aukland<sup>1\*</sup>, Pål Klepstad<sup>2</sup>, Stein Magnus Aukland<sup>3</sup>, Fatemeh Zamanzad  
15 Ghavidel<sup>4</sup>, Eirik Alnes Buanes<sup>5</sup>  
16  
17

18  
19  
20 <sup>1</sup>*Faculty of Medicine and Health Sciences, Norwegian University of Science and Technology*  
21 *(NTNU), Trondheim, Norway.*

22  
23 <sup>2</sup>*Department of Circulation and Medical Imaging, NTNU; Department of Anesthesia and*  
24 *Intensive Care Medicine, St Olav University Hospital, Trondheim, Norway.*

25  
26 <sup>3</sup>*Department of Radiology, Haukeland University Hospital; Department of Clinical*  
27 *Medicine, University of Bergen, Bergen, Norway.*

28  
29 <sup>4</sup>*Department of Research and Development, Haukeland University Hospital, Bergen,*  
30 *Norway.*

31  
32 <sup>5</sup>*Norwegian Intensive Care and Pandemic Registry; Department of Anesthesia and Intensive*  
33 *Care, Haukeland University Hospital, Bergen, Norway.*

34  
35  
36  
37  
38  
39 **\* Corresponding author**

40 e-mail address (primary): eirik\_aukland@hotmail.com

41 e-mail address (secondary): eirikaau@stud.ntnu.no  
42  
43  
44  
45

46 **Keywords:** COVID-19, acute renal failure, adult intensive & critical care  
47  
48

49 **Word count** (excludes the title page, abstract, tables, acknowledgements, contributions and  
50 references): 3062  
51  
52  
53

54 **Number of tables:** 5

55 **Number of figures:** 1

56 **Number of supplementary tables:** 2  
57  
58  
59  
60

## ABSTRACT

**Objectives:** Acute kidney injury (AKI) is a frequent complication among critical ill patients with COVID-19, but the actual incidence is unknown as AKI-incidence varies from 25 to 89% in intensive care unit (ICU) populations. We aimed to describe the prevalence and risk factors of AKI in COVID-19 patients admitted to ICU in Norway.

**Design:** Nation-wide observational study with data sampled from the Norwegian Intensive Care and Pandemic Registry (NIPaR) for the period between March 10<sup>th</sup> until December 31<sup>st</sup>, 2020.

**Setting:** ICU patients with COVID-19 in Norway. NIPaR collects data on intensive care stays covering more than 90% of Norwegian ICU and 98% of ICU stays.

**Participants:** Adult COVID-19 patients admitted to Norwegian ICU were included in the study. Patients with Chronic Kidney Disease (CKD) were excluded in order to avoid bias from CKD on the incidence of AKI.

**Primary and secondary outcome measures:** Primary outcome was AKI at ICU admission as defined by renal SAPS-II score in NIPaR. Secondary outcome measures included survival at 30 and 90 days after admission to hospital.

**Results:** A total number of 361 COVID-19 patients were included in the analysis. AKI was present in 32.0% of the patients at ICU admission. The risk for AKI at ICU admission was related to acute circulatory failure at admission to hospital. Survival for the study population at 30 and 90 days was 82.5% and 77.6%, respectively. Cancer was a predictor of 30-day mortality. Age, acute circulatory failure at hospital admission and AKI at ICU admission were predictors of both 30- and 90-day mortality.

**Conclusions:** A high number of COVID-19 patients had AKI at ICU admission. The study indicates that AKI at ICU admission was related to acute circulatory failure at hospital admission. Age, acute circulatory failure at hospital admission and AKI at ICU admission were associated with mortality.

## ARTICLE SUMMARY

### Strength and limitations of this study

- The study investigates a national registry cohort of ICU treated COVID-19 patients.
- The study provides prevalence, risk factors and outcome for COVID-19 patients with AKI in the ICU.
- AKI in the ICU was defined according to renal SAPS II score and does not fully comply with the RIFLE or KDIGO criteria due to the lack of creatinine-based measures of kidney function in the registry.

For peer review only

## INTRODUCTION

COVID-19, an infectious disease caused by the novel coronavirus Severe Acute Respiratory Syndrome Coronavirus 2 (SARS-CoV-2), has quickly developed into a pandemic since the early outbreak in Wuhan, China, in December 2019 <sup>1</sup>.

Several studies report Acute Kidney Injury (AKI) among hospitalized COVID-19 patients while less data is obtained exclusively in Intensive Care Unit (ICU) patients <sup>2-10</sup>. To our knowledge, previous studies are not based upon all ICU admissions within a large population. Furthermore, there is a call from the consensus report on COVID-19 associated AKI published by the 25<sup>th</sup> Acute Dialysis Quality Initiative (ADQI) Workgroup that studies should “incorporate the information about the proportion of different comorbidities in patients with and without AKI, including potential risk factors for the development of AKI” <sup>11</sup>.

National registries in Norway provide opportunities to perform nationwide registry studies in order to answer calls such as the one from the ADQI workgroup. The strength of such registry-based studies is that they are based on larger patient cohorts which make results more robust and generalizable. The drawback is that registry data set seldom are a direct fit for the research in question, making adaptations and extrapolations necessary.

This study is based on data available from the Norwegian Intensive Care and Pandemic Registry (NIPaR). NIPaR is a government funded national health registry constituted of two parts; the Norwegian Intensive Care Registry established in 1998, and the Norwegian Pandemic Registry established in March 2020 <sup>12</sup>. Registration is mandatory, and data is entered by hospital staff. For patients with COVID-19 in the ICU we report the prevalence of AKI, factors associated with AKI and the association between AKI and mortality.

## METHODS

The Norwegian Intensive Care and Pandemic Registry (NIPaR) contains two patient populations. NIPaR collects data on intensive care stays in pre-defined ICU, covering more than 90% of Norwegian ICU and 98% of ICU stays<sup>13</sup>. Qualification criteria for ICU and intensive care patients are defined by NIPaR<sup>14</sup>. The Norwegian Pandemic Registry includes patients admitted to hospital in Norway with a positive PCR test for SARS-CoV-2 during the previous 3 months, and includes 99% of pandemic patients admitted to hospital<sup>13</sup>. Both registry parts employ automatic and manual validation to ensure data quality.

The study group included COVID-19 patients above the age of 18 years admitted to ICU in the period between March 10<sup>th</sup>, 2020 (the initial outbreak of SARS-CoV-2 in Norway), until December 31<sup>st</sup>, 2020. Patients with Chronic Kidney Disease (CKD), defined as previously diagnosed kidney disease upon hospital admission, were excluded in order to avoid bias from CKD on the effects of AKI.

Data collection at hospital admission included age, gender, height, weight, comorbidities, pregnancy, regular medication of Angiotensin-Converting Enzyme-inhibitor (ACEi) or Angiotensin II Receptor Blocker (ARB), smoking, S-Creatinine (SCr), organ complications at hospital admission (Acute Kidney Injury [AKI], Acute Respiratory Failure [ARF], Acute Circulatory Failure [ACF] recorded at the discretion of the attending physician).

Data collection from the ICU stay included primary reason for referral to ICU, clinical scoring systems in the ICU (Glasgow Coma Scale [GCS], SAPSII-score), length of stay (LOS), mechanical ventilation, Renal Replacement Therapy (RRT) (Intermittent [IRRT] and Continuous [CRRT]), and survival (ICU first 24 hours, in-hospital at ICU and at 30 and 90 days after admission to hospital).

### Definitions

Due to lack of variables, it was not possible to employ creatinine values to define AKI in the ICU. The only available marker for renal function in the Norwegian Intensive Care Registry is contained within the Simplified Acute Physiology Score (SAPS II)<sup>15</sup>. As a result, renal Simplified Acute Physiology Score II (rSAPSII) is the sole marker for AKI during ICU stay in this study. AKI in the ICU was defined as rSAPSII score of  $\geq 4$  (Urine Output/24 h <1000



1  
2  
3 ml and/or Blood Urea Nitrogen >10 mmol/L). SAPS II is based on observations within the  
4 first 24 hours in the ICU.  
5  
6  
7

8 AKI at admission to hospital was defined according to RIFLE-criteria. A serum creatinine  
9 increase of >1.5x baseline was available as a separate variable (RIFLE Risk-category). For  
10 missing data, AKI at hospital admission was based on serum creatinine at hospital admission  
11 and the MDRD equation for estimating baseline creatinine. An estimated Glomerular  
12 Filtration Rate (GFR) of 75 ml/min/1.73m<sup>2</sup> was used to calculate baseline creatinine <sup>16</sup>. Data  
13 on ethnicity was not available for input in the equation.  
14  
15  
16  
17  
18

19 Acute Circulatory Failure (ACF) was defined as acute deterioration in the patient circulation  
20 at admission to hospital as compared to normal state, resulting in circulatory symptoms in  
21 high, moderate or light exertion or in rest. This includes cardiac arrhythmia, symptoms of heart  
22 failure and/or cardiac ischemia.  
23  
24  
25  
26  
27

28 Acute Respiratory Failure (ARF) at admission to hospital was defined as acute deterioration  
29 of respiratory function at admission to hospital as compared to normal state, resulting in  
30 respiratory symptoms in high, moderate or light exertion or in rest.  
31  
32  
33  
34

35 Comorbidities are defined as pre-existing diagnoses upon admission to hospital.

36 Comorbidities included Chronic Pulmonary Disease (CPD), Asthma, Diabetes Mellitus (DM)  
37 type 1 or 2, Chronic Kidney Disease (CKD), Cardiovascular Disease (CVD) including  
38 Hypertension, Liver disease, Chronic Neurological Disease (CND), Cancer, and  
39 Immunocompromised condition (including HIV and immunosuppressive therapy).  
40  
41  
42  
43  
44  
45

46 The primary outcome was the development of AKI at admission to ICU, while secondary  
47 outcomes included survival at 30 and 90 days after admission to hospital.  
48  
49  
50

## 51 **Statistics**

52 Statistical analysis was performed using IBM SPSS Statistics ® (version 26) and R version  
53 4.0.4. If not stated otherwise, continuous variables are presented as median and/or mean if  
54 data is normally distributed, and categorical variables are presented as the number (n) of  
55 patients (valid % of the study population). Shapiro-Wilk test of normality was performed for  
56 continuous variables. Patient characteristics for patients with or without AKI was compared  
57  
58  
59  
60

1  
2  
3 using Student's t-test for continuous variables and Fisher exact test for categorical variables.  
4 *p*-value <0.05 was considered statistically significant.  
5  
6  
7

8 Univariate logistic regression analysis was performed to examine the predictors for AKI at  
9 ICU-admission (as defined by rSAPSII-score  $\geq 4$ ). Independent variables included age,  
10 gender, comorbidities, smoking-status, medication with ACEi or ARB, ACF and ARF at  
11 admission to hospital. AKI at admission to hospital was not included as an independent  
12 variable in the analysis due to discrepancy in AKI-definition. The variables which were found  
13 to be associated with AKI at ICU admission (*p*-value <0.1) were included in multivariable  
14 logistic regression model. Multicollinearity was evaluated using the variance inflation factor  
15 (VIF). *p*-value <0.05 was considered statistically significant.  
16  
17  
18  
19  
20  
21  
22  
23

24 Univariate and multivariable logistic regression analysis as described was also performed to  
25 assess risk factors associated with 30- and 90-days mortality and the role of AKI at ICU-  
26 admission for predicting survival. Independent variables in univariate logistic regression  
27 analysis included comorbidities, age, gender, smoking-status, medication with ACEi or ARB,  
28 ACF and ARF at admission to hospital, and AKI at ICU-admission. Multicollinearity was  
29 evaluated using the VIF. *p*-value <0.05 was considered statistically significant.  
30  
31  
32  
33  
34  
35

36 Kaplan-Meier survival analyses for the time to death was performed to compare the group  
37 with AKI at ICU-admission versus the group with no AKI. The comparison was done using  
38 log-rank test. Level of significance was considered *p*-value <0.05. Days from ICU-admission  
39 to death (event) or May 15<sup>th</sup>, 2021 (censoring), considered the time of analysis.  
40  
41  
42  
43

#### 44 **Ethics**

45 The study was approved by Regional Committees for Medical and Health Research Ethics  
46 West (approval number 169604). Informed consent was waived based on information to  
47 participants in NIPaR about the registry and their right to withdraw from NIPaR.  
48  
49  
50  
51  
52  
53  
54  
55  
56  
57  
58  
59  
60

## RESULTS

A total of 394 adult patients were admitted to ICU with COVID-19 in the study period. Thirty-three of the patients were excluded due to CKD, resulting in a study population of 361 ICU-patients, 100 females and 261 males. Median age was 63.6 [IQR; 53.5-72.5] years and median BMI was 27.7 [24.8-32.0] kg/m<sup>2</sup>. Current smokers constituted 2.5% of the patients. None of the female patients were pregnant. Median length of stay (LOS) at the ICU was 11.6 [5.7-19.5] days. Mechanical ventilation was initiated in 81.2% of the patients.

Comorbidity was reported in 68.1% of the study population, and 29.1% had two or more comorbidities. Regular medication of Angiotensin Converting Enzyme-inhibitor (ACEi) and/or Angiotensin II Receptor Blocker (ARB) was used by 23.4% of the study population (Table 1).

**Table 1: Patient characteristics by AKI-status at ICU admission.**

| <b>Patient demographics</b> | All patients<br>(N = 361) | Missing data<br>(No of<br>patients) | AKI<br>(n = 114) | No AKI<br>(n = 242) | <i>p</i> -value<br>(AKI vs no AKI) |
|-----------------------------|---------------------------|-------------------------------------|------------------|---------------------|------------------------------------|
| Age in years, median [IQR]  | 63.6 [53.5-72.5]          | -                                   | 65.6 [58.4-73.6] | 61.6 [52.0-72.3]    | <b>0.003</b>                       |
| Male                        | 261 (72.3%)               | -                                   | 86 (75.4%)       | 172 (71.1%)         | 0.233                              |
| Female                      | 100 (27.7%)               | -                                   | 28 (24.6%)       | 70 (28.9%)          | 0.233                              |
| BMI, median [IQR]           | 27.7 [24.8-32.0]          | 141                                 | 27.3 [23.0-30.6] | 28.3 [25.1-32.4]    | 0.132                              |
| BMI $\geq$ 30               | 83 (37.7%)                | 141                                 | 21 (31.8%)       | 61 (40.4%)          | 0.147                              |
| Current smoker              | 9 (2.5%)                  | -                                   | 3 (2.6%)         | 6 (2.5%)            | 0.592                              |
| Comorbidity/ies             | 246 (68.1%)               | -                                   | 81 (71.1%)       | 161 (66.5%)         | 0.233                              |
| 1                           | 141 (39.1%)               | -                                   | 44 (38.6%)       | 94 (38.8%)          | 0.530                              |
| $\geq$ 2                    | 105 (29.1%)               | -                                   | 37 (32.5%)       | 67 (27.7%)          | 0.212                              |
| CVD                         | 158 (43.8%)               | -                                   | 58 (50.9%)       | 98 (40.5%)          | <b>0.042</b>                       |
| DM                          | 74 (20.5%)                | -                                   | 23 (20.2%)       | 50 (20.7%)          | 0.518                              |
| Asthma                      | 55 (15.2%)                | -                                   | 15 (13.2%)       | 39 (16.1%)          | 0.288                              |
| CPD                         | 37 (10.2%)                | -                                   | 14 (12.3%)       | 23 (9.5%)           | 0.266                              |
| Immunocompromised           | 20 (5.5%)                 | -                                   | 5 (4.4%)         | 14 (5.8%)           | 0.394                              |
| Cancer                      | 17 (4.7%)                 | -                                   | 6 (5.3%)         | 11 (4.5%)           | 0.476                              |
| CND                         | 12 (3.3%)                 | -                                   | 5 (4.4%)         | 7 (2.9%)            | 0.329                              |
| Liver disease               | 3 (0.8%)                  | -                                   | 1 (0.9%)         | 2 (0.8%)            | 0.687                              |
| ACEi/ARB                    | 83 (23.4%)                | 7                                   | 34 (30.6%)       | 47 (19.7%)          | <b>0.019</b>                       |

AKI = Acute Kidney Injury, ICU = Intensive Care Unit, IQR = Interquartile Range, BMI = Body Mass Index, CVD = Cardiovascular Disease, DM = Diabetes Mellitus, CPD = Chronic Pulmonary Disease, CND = Chronic Neurological Disease, ACEi = Angiotensin-Converting Enzyme-inhibitor, ARB = Angiotensin II Receptor Blocker.

Patients with AKI at admission to the ICU were older than patients with no AKI. They also had more cardiovascular disease (CVD) and used more often ACEi or ARB (Table 1).

Patients with AKI at admission to ICU were more likely to have reduced GCS, and they had a higher SAPS II score (Table 2).

**Table 2: Laboratory findings and organ complications by AKI-status at ICU admission.**

| Variables at admission to hospital      | All patients<br>(N = 361) | Missing data<br>(No of patients) | AKI<br>(n= 114)   | No AKI<br>(n= 242) | p-value<br>(AKI vs No AKI) |
|-----------------------------------------|---------------------------|----------------------------------|-------------------|--------------------|----------------------------|
| SCr in $\mu\text{mol/l}$ , median [IQR] | 85.0 [70.3-104.0]         | 1                                | 98.0 [73.5-128.0] | 80.5 [69.5-96.0]   | <0.000                     |
| Estimated baseline SCr, median [IQR]    | 92.5 [76.0-95.6]          | -                                | 92.5 [85.0-94.5]  | 92.7 [75.3-96.1]   | 0.826                      |
| AKI at hospital-admission               | 105 (29.1%)               | 4                                | 62 (54.4%)        | 42 (17.4%)         | <0.000                     |
| Severe ARF                              | 319 (88,6%)               | 1                                | 103 (91,2%)       | 212 (87.2%)        | 0.213                      |
| Severe ACF                              | 124 (35,4%)               | 11                               | 49 (45,0%)        | 74 (31.4%)         | 0.010                      |
| <b>Variables at ICU</b>                 |                           |                                  |                   |                    |                            |
| GCS                                     |                           |                                  |                   |                    |                            |
| 14-15                                   | 323 (89.5%)               | -                                | 89 (78.1%)        | 229 (94.6%)        | <0.000                     |
| $\leq 13$                               | 38 (10.5%)                | -                                | 25 (21.9%)        | 13 (5.4%)          | <0.000                     |
| SAPS II score, median [IQR]             | 34.0 [26.0-42.0]          | -                                | 43.0 [37.0-50.0]  | 31.0 [24.0-36.0]   | <0.000                     |
| BUN in mmol/L                           |                           | 5                                |                   |                    |                            |
| <10                                     | 275 (77.2%)               | -                                | 33 (28.9%)        | 242 (100.0%)       | <0.000                     |
| 10-29,9                                 | 79 (21.9%)                | -                                | 79 (69.3%)        |                    |                            |
| $\geq 30$                               | 2 (0.6%)                  | -                                | 2 (1.8%)          |                    |                            |
| UO in ml per 24 hours                   |                           |                                  |                   |                    |                            |
| >1000                                   | 307 (85.0%)               | -                                | 60 (52.6%)        | 242 (100.0%)       | <0.000                     |
| 500-999                                 | 35 (9.7%)                 | -                                | 35 (30.7%)        |                    |                            |
| <500                                    | 19 (5.3%)                 | -                                | 19 (16.7%)        |                    |                            |
| <b>AKI at ICU admission</b>             | 114 (32.0%)               | 5                                |                   |                    |                            |

AKI = Acute Kidney Injury, ICU = Intensive Care Unit, SCr = Serum-Creatinine, IQR = Interquartile Range, ARF = Acute Respiratory Failure, ACF = Acute Circulatory Failure, GCS = Glasgow Coma Scale, SAPS II = Simplified Acute Physiology Score II, BUN = Blood Urea Nitrogen, UO = Urine Output.

The distribution of organ failure at admission to hospital were 88.6%, 35.4% and 29.1% for Acute Respiratory Failure (ARF), Acute Circulatory Failure (ACF), and AKI (as defined by RIFLE-criteria), respectively. ACF at hospital admission was significantly more prevalent in patients who suffered AKI at ICU admission ( $p$ -value <0.05).

A total of 114 (32.0%) patients had AKI in the ICU. From these, 79 (69.3%) and 2 (1.8%) had BUN =10-29.9 mmol/L and  $\geq$ 30 mmol/L, respectively. Urine Output (UO) of 500-999 ml/24 hours and <500 ml/24 hours were presented by 30.7% and 16.7%. More than half of the patients who had AKI at ICU-admission also had AKI at admission to hospital.

Renal Replacement Therapy (RRT) was required in 8.0% ( $n = 29$ ) of the total patient group during the ICU-stay (Table 3). Continuous RRT (CRRT) was initiated in 28 patients, and intermittent RRT (IRRT) was initiated in 7 patients. Median time with CRRT was 9.0 [5.0-14.0] days and 6.5 [5.0-7.5] days with IRRT.

**Table 3: Treatment and patient outcome by AKI-status at ICU admission.**

| <b>Treatment</b>                                                                                                                                                                                                                    | All patients<br>(N = 361) | Missing data<br>(No of<br>patients) | AKI<br>(n = 114) | No AKI<br>(n = 242) | <i>p</i> -value<br>(AKI vs no AKI) |
|-------------------------------------------------------------------------------------------------------------------------------------------------------------------------------------------------------------------------------------|---------------------------|-------------------------------------|------------------|---------------------|------------------------------------|
| LOS in ICU, median [IQR]                                                                                                                                                                                                            | 11.6 [5.7-19.5]           | -                                   | 13.5 [5.9-25.6]  | 10.9 [5.7-19.0]     | 0.125                              |
| Mechanical ventilation <sup>a</sup>                                                                                                                                                                                                 | 293 (81.2%)               | -                                   | 99 (86.8%)       | 192 (79.3%)         | 0.057                              |
| RRT                                                                                                                                                                                                                                 | 29 (8.0%)                 | -                                   | 16 (14.0%)       | 13 (5.4%)           | <b>0.006</b>                       |
| CRRT                                                                                                                                                                                                                                | 28 (7.8%)                 | -                                   | 15 (13.2%)       | 13 (5.4%)           | <b>0.012</b>                       |
| Median days [IQR]                                                                                                                                                                                                                   | 9.0 [5.0-14.0]            | -                                   | 8.0 [5.0-12.0]   | 11.5 [5.5-16.3]     | 0.863                              |
| IRRT                                                                                                                                                                                                                                | 7 (1.9%)                  | -                                   | 6 (5.3%)         | 0 (0.0%)            | <b>0.001</b>                       |
| Median days [IQR]                                                                                                                                                                                                                   | 6.5 [5.0-7.5]             | -                                   | 6.5 [5.0-7.5]    | -                   | -                                  |
| <b>Outcome</b>                                                                                                                                                                                                                      |                           |                                     |                  |                     |                                    |
| Survival first 24 hours in ICU                                                                                                                                                                                                      | 358 (99.2%)               | -                                   | 111 (97.4%)      | 242 (100.0%)        | <b>0.032</b>                       |
| Survival at hospital discharge                                                                                                                                                                                                      | 295 (81.7%)               | -                                   | 80 (70.2%)       | 210 (86.8%)         | <b>&lt;0.000</b>                   |
| Survival at 30 days                                                                                                                                                                                                                 | 298 (82.5%)               | -                                   | 77 (67.5%)       | 217 (89.7%)         | <b>&lt;0.000</b>                   |
| Survival at 90 days                                                                                                                                                                                                                 | 280 (77.6%)               | -                                   | 70 (61.4%)       | 206 (85.1%)         | <b>&lt;0.000</b>                   |
| AKI = Acute Kidney Injury, ICU = Intensive Care Unit, LOS = Length of stay, IQR = Interquartile Range, RRT = Renal Replacement Therapy, CRRT = Continuous Renal Replacement Therapy, IRRT = Intermittent Renal Replacement Therapy. |                           |                                     |                  |                     |                                    |

Survival for the total study population at 30 and 90 days was 82.5% and 77.6%, respectively. Survival at 30 and 90 days in patients with AKI at ICU admission were 67.5% and 61.4%, respectively, which was significantly lower compared to 89.7% and 85.1% in patients with no AKI.

A total of 337 patients with no missing data were included in three logistic regression analyses to assess risk factors for AKI at ICU admission and risk factors associated with mortality.

In the first multivariate model only ACF was significantly associated with the development of AKI at ICU-admission (OR 1.19; 95% CI: 1.05–1.35) (Table 4). Multicollinearity was evaluated using the variance inflation factor (VIF). VIF ranged from 1.02 (ACF) to 1.51 (CVD). The area under the curve (AUC) was 0.64 (95% CI: 0.57–0.70).

**Table 4: Odds for AKI at ICU admission.**

| Univariate logistic regression |      |              |                 | Multivariable logistic regression |             |                  |
|--------------------------------|------|--------------|-----------------|-----------------------------------|-------------|------------------|
| Variable                       | OR   | 95% CI       | <i>p</i> -value | OR                                | 95% CI      | <i>p</i> -value  |
| Immunocompromised              | 0.50 | 0.11 - 1.58  | 0.281           |                                   |             |                  |
| Liver disease                  | 1.11 | 0.05 - 11.67 | 0.935           |                                   |             |                  |
| Cancer                         | 0.80 | 0.22 - 2.39  | 0.701           |                                   |             |                  |
| CND                            | 1.27 | 0.33 - 4.31  | 0.705           |                                   |             |                  |
| Current smoker                 | 1.11 | 0.23 - 4.29  | 0.886           |                                   |             |                  |
| Gender                         | 0.88 | 0.52 - 1.46  | 0.619           |                                   |             |                  |
| Age                            | 1.02 | 1.01 - 1.04  | <b>0.013</b>    | 1.02                              | 1.00 - 1.04 | 0.121            |
| CVD                            | 1.50 | 0.94 - 2.38  | 0.089           | 1.00                              | 0.56 - 1.78 | 0.996            |
| DM                             | 0.95 | 0.52 - 1.69  | 0.867           |                                   |             |                  |
| Asthma                         | 0.79 | 0.39 - 1.49  | 0.474           |                                   |             |                  |
| CPD                            | 1.17 | 0.54 - 2.42  | 0.673           |                                   |             |                  |
| ACEi/ARB                       | 1.77 | 1.04 - 3.00  | <b>0.033</b>    | 1.52                              | 0.82 - 2.83 | 0.187            |
| ACF                            | 1.21 | 1.07 - 1.37  | <b>0.002</b>    | 1.19                              | 1.05 - 1.35 | <b>0.006</b>     |
| ARF                            | 1.08 | 0.85 - 1.42  | 0.561           |                                   |             |                  |
| (Intercept)                    |      |              |                 | 0.09                              | 0.03 - 0.31 | <b>&lt;0.000</b> |

AKI = Acute Kidney Injury, ICU = Intensive Care Unit, OR = Odds Ratio, CI = Confidence Interval, CND = Chronic Neurological Disease, CVD = Cardiovascular Disease, DM = Diabetes Mellitus, CPD = Chronic Pulmonary Disease, ACEi = Angiotensin-Converting Enzyme-inhibitor, ARB = Angiotensin II Receptor Blocker, ACF = Acute Circulatory Failure, ARF = Acute Respiratory Failure.

In the second multivariate model, risk factors associated with 30-day mortality were Cancer, Age, AKI at ICU-admission and ACF (Table 5). VIF ranged from 1.03 (ACF) to 1.47 (CVD). The AUC was 0.87 (95% CI 0.83–0.92).

**Table 5: Odds for survival at 30 days.**

| Univariate logistic regression |      |              |                  | Multivariable logistic regression |              |                  |
|--------------------------------|------|--------------|------------------|-----------------------------------|--------------|------------------|
| Variable                       | OR   | 95% CI       | <i>p</i> -value  | OR                                | 95% CI       | <i>p</i> -value  |
| Immunocompromised              | 0.29 | 0.02 - 1.47  | 0.235            |                                   |              |                  |
| Liver disease                  | 2.28 | 0.11 - 24.21 | 0.503            |                                   |              |                  |
| Cancer                         | 3.24 | 1.05 - 9.35  | <b>0.032</b>     | 4.39                              | 1.17 - 15.90 | <b>0.024</b>     |
| CND                            | 0.44 | 0.02 - 2.38  | 0.442            |                                   |              |                  |
| Current smoker                 | 1.30 | 0.19 - 5.55  | 0.746            |                                   |              |                  |
| Gender                         | 1.54 | 0.85 - 2.75  | 0.149            |                                   |              |                  |
| Age                            | 1.08 | 1.05 - 1.11  | <b>&lt;0.000</b> | 1.07                              | 1.04 - 1.11  | <b>&lt;0.000</b> |
| CVD                            | 2.33 | 1.33 - 4.15  | <b>0.004</b>     | 0.93                              | 0.40 - 2.11  | 0.857            |
| DM                             | 1.14 | 0.56 - 2.20  | 0.707            |                                   |              |                  |
| Asthma                         | 1.09 | 0.49 - 2.25  | 0.818            |                                   |              |                  |
| CPD                            | 4.17 | 1.97 - 8.73  | <b>&lt;0.000</b> | 2.50                              | 0.98 - 6.43  | 0.055            |
| ACEi/ARB                       | 2.02 | 1.09 - 3.66  | <b>0.023</b>     | 1.24                              | 0.53 - 2.89  | 0.625            |
| ACF                            | 1.78 | 1.50 - 2.14  | <b>&lt;0.000</b> | 1.70                              | 1.41 - 2.09  | <b>&lt;0.000</b> |
| ARF                            | 1.18 | 0.87 - 1.79  | 0.349            |                                   |              |                  |
| <b>AKI at ICU admission</b>    | 4.32 | 2.44 - 7.78  | <b>&lt;0.000</b> | 3.78                              | 1.90 - 7.67  | <b>&lt;0.000</b> |
| (Intercept)                    |      |              |                  | 0.00                              | 0.00 - 0.002 | <b>&lt;0.000</b> |

OR = Odds Ratio, CI = Confidence Interval, CND = Chronic Neurological Disease, CVD = Cardiovascular Disease, DM = Diabetes Mellitus, CPD = Chronic Pulmonary Disease, ACEi = Angiotensin-Converting Enzyme-inhibitor, ARB = Angiotensin II Receptor Blocker, ACF = Acute Circulatory Failure, ARF = Acute Respiratory Failure, AKI = Acute Kidney Injury, ICU = Intensive Care Unit.

In the third model, age, AKI at ICU-admission and ACF were associated with 90-day mortality (Table S1). VIF in this model ranged from 1.02 (ACF) to 1.46 (CVD). The AUC was 0.87 (95% CI 0.82–0.91).

The results of Kaplan-Meier survival analysis stratified by AKI-status at admission to ICU showed that patients with AKI had significantly lower survival than patients without AKI (log-rank *p*-value <0.001) (Fig 1). The difference in survival was constrained to the first 50 days.

<Figure 1>



## DISCUSSION

We performed a nationwide study of 361 adult patients with COVID-19 admitted to ICU. Prevalence of AKI at ICU admission was 32.0%. Acute Circulatory Failure (ACF) at hospital admission predicted AKI at ICU admission. Age, Cancer, ACF, and AKI at ICU admission were risk factors for mortality at 30 days.

The COVID-19 pandemic in Norway, with its population of 5.4 million people<sup>17</sup>, has been relatively well contained. During the study period a total 50145 cases of SARS-CoV-2 were reported, of which 2185 were admitted to hospital and 394 to the ICU<sup>18</sup>. As in other countries, patients with COVID-19 in Norwegian ICU tend to be younger and more likely male compared with the general ICU-population<sup>14</sup>. Most patients in the study population were overweight, and a large proportion were obese, which is markedly different than in the general Norwegian population<sup>19</sup>. Comorbidities such as CVD, DM and Asthma, were also more prevalent in the study population than in the general Norwegian population<sup>20</sup>.

The definition of AKI at ICU admission in our study does not fully comply with the AKI staging criteria due to the lack of creatinine-based measures of kidney function in the Norwegian Intensive Care Registry<sup>21</sup>. The SAPS II criteria for reduced urine output are similar to the staging criteria from the AKI network consensus, corresponding to AKI stage 2 and 3 (Table S2). BUN may increase by factors unrelated to kidney function, for instance due to steroid use which is regularly prescribed to COVID-19 patients in the ICU<sup>22</sup>. This would lead to an overestimate of AKI at ICU admission in our study, given standard enteral nutrition practices in Norwegian ICU. Creatinine is also influenced by several factors unrelated to kidney function but was chosen over BUN as the preferred biochemical parameter in the consensus process leading up to AKI definitions due to its widespread use<sup>21 23</sup>.

While not fully in line with current AKI definitions, the combination of urine output and BUN should provide an estimate of AKI sufficiently similar to that of creatinine and urine output to be relevant in a registry study. The significant difference in s-creatinine at admission to hospital between patients with and without AKI at ICU admission in our material supports this assumption. Prevalence of AKI at ICU admission in our study is also similar to previous findings in the general ICU population. Bagshaw et al. report that on the

1  
2  
3 day of ICU-admission, 36% of the general ICU-population suffer AKI as defined by RIFLE-  
4 criteria, 16.3% in the Risk group and 19.9% in the Injury and Failure groups combined <sup>24</sup>. A  
5 narrative review in COVID-19 found 23% prevalence of AKI in the ICU <sup>25</sup>. In our study,  
6  
7 30.2% (n = 114) of COVID-19 patients admitted to ICU had AKI (Table 2).  
8  
9

10  
11 Due to the lack of granularity in our data there are findings in our material that warrant  
12 further investigation. In our study group, 40.4% (n = 42) of the patients with AKI at  
13 admission to hospital did not present AKI at ICU admission. It is likely that different AKI  
14 criteria applied at hospital admission and ICU admission affects this difference. However, we  
15 cannot rule out, for instance, that patients with mild pre-renal AKI at admission were  
16 clinically stabilized to normal kidney function in a hospital ward prior to ICU admission due  
17 to respiratory failure. This would not contradict the impression that many COVID-19 patients  
18 in the ICU have single organ respiratory dysfunction <sup>26</sup>. On the other hand, 5.4% (n=13) of  
19 patients with no AKI at ICU admission received RRT during their ICU stay (Table 3). We  
20 would expect some patients with long ICU stays do develop AKI during their ICU stays, but  
21 we cannot rule out losing cases of AKI at ICU admission due to lack of creatinine values in  
22 the ICU. In order to establish the timeline of AKI in COVID-19 patients in ICU, studies with  
23 higher granularity data including serial urine output and creatinine measurements are needed.  
24  
25  
26  
27  
28  
29  
30  
31  
32  
33  
34  
35

36 In the regression model for AKI at ICU admission, only ACF at admission to hospital was  
37 found to be significantly associated. ACF is an uncommonly reported parameter at admission  
38 to hospital, and thus often not included in analysis for prediction of AKI. Although we  
39 biologically would expect collinearity between ACF and AKI at ICU admission, this was  
40 contradicted by low VIF in the statistical analysis. The results suggests that AKI at ICU  
41 admission is more closely associated to circulatory status than any other factors in critically  
42 ill COVID-19 patients.  
43  
44  
45  
46  
47  
48  
49

50 In the regression model on survival, the factors Age, Cancer, ACF and AKI at ICU admission  
51 were significantly associated with increased risk of death during first 30 days. Age, ACF, and  
52 AKI at ICU admission were significantly associated with increased risk of death during first  
53 90 days. AKI at ICU admission contributed considerably more to the regression model than  
54 both age and CVD, which are previously well-recognized risk factors for severe disease  
55 progression and mortality in COVID-19 <sup>27</sup>. The finding puts AKI at ICU admission up as a  
56 strong and clinically important marker of survival in critically ill COVID-19 patients, more  
57  
58  
59  
60

1  
2  
3 so than age and CVD. While cancer also had a high contribution to the model, only 17  
4 patients with cancer are included in the study, which reduces the clinical impact of this  
5 finding. Chronic Pulmonary Disease (CPD) also contributes to the model but is only  
6 borderline significant. This is a risk factor in a larger group of the study population, 37 in  
7 total, and as such may be a more clinically relevant risk factor than cancer.  
8  
9  
10  
11  
12

13 More than one out of three patients with AKI diagnosed first 24 hours of ICU-stay were  
14 deceased after 30-90 days. The Kaplan-Meier analysis illustrates that the mortality is  
15 predominantly in the short term within 50 days, in essence predominantly during the acute  
16 phase of illness. The finding supports that AKI at ICU-admission is a clinically important  
17 marker for poor outcome in COVID-19 (Figure 1). Low VIF in both regression models  
18 means that the effects of collinearity in the models are low. This puts further emphasis on  
19 AKI at ICU admission as an important prognostic factor for mortality in COVID-19.  
20  
21  
22  
23  
24  
25  
26

27 We recognize several strengths and limitations in this study. The study is a national cohort  
28 containing complete data of all Norwegian COVID-19 patients (N = 394) admitted to ICU in  
29 the study period. Furthermore, because of the mandatory obligation by the Norwegian  
30 authorities to deliver data, the number of missing data was negligible. ICU admission criteria  
31 and treatment traditions are also similar in Norwegian ICUs which renders that data are  
32 comparable across centers. Furthermore, during the COVID-19 pandemic in Norway patients  
33 were not denied ICU care due to capacity concerns, thereby reducing selection bias due to  
34 triage decisions.  
35  
36  
37  
38  
39  
40  
41  
42

43 While national data increases generalizability, a limitation in this study is that the Norwegian  
44 Intensive Care and Pandemic Registry (NIPaR) does not contain creatinine-based measures  
45 for AKI. This limitation mandates that the results be interpreted with caution. We also lack  
46 data regarding the timeline of AKI in COVID-19. While the statistical analyses are rigorous,  
47 we nevertheless recommend that the results are treated as a basis for further investigation.  
48  
49  
50  
51  
52  
53  
54  
55  
56  
57  
58  
59  
60

## CONCLUSION

In this national cohort of COVID-19 patients admitted to ICUs in Norway 32.0% (n = 114) developed Acute Kidney Injury (AKI) during first 24 hours of ICU-admission. The majority presented clinical and/or biochemical signs of AKI at admission to hospital. The study indicates that Acute Circulatory Failure (ACF) at hospital admission was the most important risk factor for AKI at admission to ICU, and that age, cancer, ACF and AKI at ICU-admission were associated with mortality at 30 days after hospital admission.

For peer review only

## REFERENCES

1. World Health Organization. Coronavirus Disease (COVID-19) Situation Report 51 [Internet]. March 11, 2020 [cited May 22, 2021]. Available from: [https://www.who.int/docs/default-source/coronaviruse/situation-reports/20200311-sitrep-51-covid-19.pdf?sfvrsn=1ba62e57\\_10](https://www.who.int/docs/default-source/coronaviruse/situation-reports/20200311-sitrep-51-covid-19.pdf?sfvrsn=1ba62e57_10).
2. Sardu C, Gambardella J, Morelli MB, et al. Hypertension, Thrombosis, Kidney Failure, and Diabetes: Is COVID-19 an Endothelial Disease? A Comprehensive Evaluation of Clinical and Basic Evidence. *J Clin Med* 2020;9(5) doi: 10.3390/jcm9051417 [published Online First: 2020/05/11]
3. Farouk SS, Fiaccadori E, Cravedi P, et al. COVID-19 and the kidney: what we think we know so far and what we don't. *J Nephrol* 2020 doi: 10.1007/s40620-020-00789-y [published Online First: 2020/07/22]
4. Chen YT, Shao SC, Hsu CK, et al. Incidence of acute kidney injury in COVID-19 infection: a systematic review and meta-analysis. *Crit Care* 2020;24(1):346. doi: 10.1186/s13054-020-03009-y [published Online First: 2020/06/18]
5. Hirsch JS, Ng JH, Ross DW, et al. Acute kidney injury in patients hospitalized with COVID-19. *Kidney Int* 2020 doi: 10.1016/j.kint.2020.05.006 [published Online First: 2020/05/16]
6. Rubin S, Orioux A, Prevel R, et al. Characterization of acute kidney injury in critically ill patients with severe coronavirus disease 2019. *Clin Kidney J* 2020;13(3):354-61. doi: 10.1093/ckj/sfaa099 [published Online First: 2020/06/06]
7. Xu J, Yang X, Yang L, et al. Clinical course and predictors of 60-day mortality in 239 critically ill patients with COVID-19: a multicenter retrospective study from Wuhan, China. *Crit Care* 2020;24(1):394. doi: 10.1186/s13054-020-03098-9 [published Online First: 2020/07/06]
8. Yu Y, Xu D, Fu S, et al. Patients with COVID-19 in 19 ICUs in Wuhan, China: a cross-sectional study. *Crit Care* 2020;24(1):219. doi: 10.1186/s13054-020-02939-x [published Online First: 2020/05/14]
9. Luther T, Bülow-Anderberg S, Larsson A, et al. COVID-19 patients in intensive care develop predominantly oliguric acute kidney injury. *Acta Anaesthesiol Scand* 2020 doi: 10.1111/aas.13746 [published Online First: 2020/11/15]
10. Martinot M, Eyriey M, Gravier S, et al. Predictors of mortality, ICU hospitalization, and extrapulmonary complications in COVID-19 patients. *Infect Dis Now* 2021;51(6):518-25. doi: 10.1016/j.idnow.2021.07.002 [published Online First: 20210707]
11. Nadim MK, Forni LG, Mehta RL, et al. COVID-19-associated acute kidney injury: consensus report of the 25th Acute Disease Quality Initiative (ADQI) Workgroup. *Nat Rev Nephrol* 2020;16(12):747-64. doi: 10.1038/s41581-020-00356-5 [published Online First: 2020/10/15]

- 1  
2  
3 12. Nasjonalt Servicemiljø for medisinske kvalitetsregistre. Norsk Intensiv- og pandemiregister  
4 [Internet]. [cited Sept 23, 2020]. Available from:  
5  
6 <https://www.kvalitetsregistre.no/registers/norsk-intensiv-og-pandemiregister>.  
7
- 8 13. Buanes EA, Kvåle R, Barratt-Due A. Årsrapport for 2020 med plan for forbedringstiltak [Internet].  
9 Norsk intensiv- og pandemiregister. Jun 15, 2021 [cited Jun 18, 2021]. Available from:  
10 <https://helse-bergen.no/norsk-intensivregister-nir/arsrapportar>.  
11
- 12 14. Buanes EA, Kvåle R, Barratt-Due A. Årsrapport for 2019 med plan for forbedringstiltak [Internet].  
13 Norsk Intensivregister. Nov 10, 2020 [cited Dec 15, 2020]. Available from: <https://helse-bergen.no/norsk-intensivregister-nir/arsrapportar>.  
14
- 15 15. Le Gall JR, Lemeshow S, Saulnier F. A new Simplified Acute Physiology Score (SAPS II) based  
16 on a European/North American multicenter study. *JAMA* 1993;270(24):2957-63. [published  
17 Online First: 1993/12/22]  
18
- 19 16. Bagshaw SM, Uchino S, Cruz D, et al. A comparison of observed versus estimated baseline  
20 creatinine for determination of RIFLE class in patients with acute kidney injury. *Nephrol Dial*  
21 *Transplant* 2009;24(9):2739-44. doi: 10.1093/ndt/gfp159 [published Online First:  
22 2009/04/06]  
23
- 24 17. Statistisk Sentralbyrå. Befolkning [Internet] 2021 [updated Aug 19, 2021; cited Oct 10, 2021].  
25 Available from <https://www.ssb.no/befolkning/folketall/statistikk/befolkning>.  
26
- 27 18. Folkehelseinstituttet. Statistikk om koronavirus og covid-19 [Internet]. [updated Jun 9, 2021; cited  
28 Jun 9, 2021]. Available from: <https://www.fhi.no/sv/smittsomme-sykdommer/corona/dags--og-ukerapporter/dags--og-ukerapporter-om-koronavirus/#table-pagination-32719729>.  
29
- 30 19. Statistisk Sentralbyrå. Helseforhold, levekårsundersøkelsen [Internet]. In: 06181: Levevaner  
31 (prosent) etter statistikkvariabel, år og kjønn, 2019 [cited May 22, 2021]. Available from:  
32 <https://www.ssb.no/statbank/table/06181/tableViewLayout1/>.  
33
- 34 20. Statistisk Sentralbyrå. Helseforhold, levekårsundersøkelsen [Internet]: In: 11190: Sykelighet.  
35 Sykdom, skade eller funksjonshemming, etter type sykelighet, alder, statistikkvariabel, år og  
36 kjønn, 2019 [cited May 22, 2021]. Available from:  
37 <https://www.ssb.no/statbank/table/11190/tableViewLayout1/>.  
38
- 39 21. Mehta RL, Kellum JA, Shah SV, et al. Acute Kidney Injury Network: report of an initiative to  
40 improve outcomes in acute kidney injury. *Crit Care* 2007;11(2):R31. doi: 10.1186/cc5713  
41
- 42 22. Inker LA, Perrone RD. Assessment of kidney function. In: UpToDate, Sterns RH (Ed), UpToDate,  
43 Waltham, MA. [updated Oct 4, 2021; cited Oct 10, 2021].  
44
- 45 23. Edelstein CL. Biomarkers of acute kidney injury. *Adv Chronic Kidney Dis* 2008;15(3):222-34.  
46 doi: 10.1053/j.ackd.2008.04.003  
47
- 48 24. Bagshaw SM, George C, Dinu I, et al. A multi-centre evaluation of the RIFLE criteria for early  
49 acute kidney injury in critically ill patients. *Nephrol Dial Transplant* 2008;23(4):1203-10.  
50 doi: 10.1093/ndt/gfm744 [published Online First: 2007/10/25]  
51  
52  
53  
54  
55  
56  
57  
58  
59  
60

- 1  
2  
3 25. Gabarre P, Dumas G, Dupont T, et al. Acute kidney injury in critically ill patients with COVID-  
4 19. *Intensive Care Med* 2020;46(7):1339-48. doi: 10.1007/s00134-020-06153-9 [published  
5 Online First: 2020/06/14]  
6  
7  
8 26. Laake JH, Buanes EA, Småstuen MC, et al. Characteristics, management and survival of ICU  
9 patients with coronavirus disease-19 in Norway, March-June 2020. A prospective  
10 observational study. *Acta Anaesthesiol Scand* 2021;65(5):618-28. doi: 10.1111/aas.13785  
11 [published Online First: 20210227]  
12  
13  
14 27. Zheng Z, Peng F, Xu B, et al. Risk factors of critical & mortal COVID-19 cases: A systematic  
15 literature review and meta-analysis. *J Infect* 2020 doi: 10.1016/j.jinf.2020.04.021 [published  
16 Online First: 2020/04/23]  
17  
18  
19  
20  
21  
22  
23  
24  
25  
26  
27  
28  
29  
30  
31  
32  
33  
34  
35  
36  
37  
38  
39  
40  
41  
42  
43  
44  
45  
46  
47  
48  
49  
50  
51  
52  
53  
54  
55  
56  
57  
58  
59  
60

## ABREVIATIONS

ACEi = Angiotensin-Converting Enzyme-inhibitor

ACF = Acute Circulatory Failure

ADQI = Acute Dialysis Quality Initiative

AKI = Acute Kidney Injury

ARB = Angiotensin II Receptor Blocker

ARF = Acute Respiratory Failure

BMI = Body Mass Index

BUN = Blood Urea Nitrogen

CKD = Chronic Kidney Disease

CND = Chronic Neurological Disease

COVID-19 = Corona Virus Disease-19

CPD = Chronic Pulmonary Disease

CRRT = Continuous Renal Replacement Therapy

CVD = Cardiovascular Disease

DM = Diabetes Mellitus

GFR = Glomerular Filtration Rate

GCS = Glasgow Coma Scale

ICU = Intensive Care Unit

IRRT = Intermittent Renal Replacement Therapy

KDIGO = The Kidney Disease: Improving Global Outcomes

NIPaR = Norwegian Intensive Care and Pandemic Registry

RIFLE = Risk, Injury, Failure, Loss of kidney function and End-stage renal disease

RRT = Renal Replacement Therapy

rSAPS II = renal Simplified Acute Physiology Score II

SAPS II = Simplified Acute Physiology Score II

SARS-CoV-2 = Severe Acute Respiratory Syndrome Coronavirus 2

SCr = Serum-Creatinine

UO = Urine Output



## **FUNDING STATEMENT**

This research received no specific grant from any funding agency in the public, commercial or not-for-profit sectors.

## **COMPETING INTERESTS STATEMENT**

The authors declare no conflict of interest.

## **DATA SHARING STATEMENT**

Data cannot be shared publicly because of GDPR restrictions. Data are available from Norwegian Intensive Care and Pandemic Registry (NIPaR) upon application containing necessary approvals

## **AUTHOR CONTRIBUTIONS**

All authors contributed to the study design. EAA and EAB collected data; EAA and FZG analyzed the data; All authors contributed to interpretation of results and in writing the paper.

## **EXCLUSIVE LICENSE STATEMENT**

I, the Submitting Author has the right to grant and does grant on behalf of all authors of the Work (as defined in the below author licence), an exclusive licence and/or a non-exclusive licence for contributions from authors who are: i) UK Crown employees; ii) where BMJ has agreed a CC-BY licence shall apply, and/or iii) in accordance with the terms applicable for US Federal Government officers or employees acting as part of their official duties; on a worldwide, perpetual, irrevocable, royalty-free basis to BMJ Publishing Group Ltd (“BMJ”) its licensees and where the relevant Journal is co-owned by BMJ to the co-owners of the Journal, to publish the Work in BMJ Open and any other BMJ products and to exploit all rights, as set out in our licence.

## **PATIENT CONSENT FORM**

Not applicable.

## PATIENT AND PUBLIC INVOLVEMENT STATEMENT

Patients or the public were not involved in the design, or conduct, or reporting, or dissemination plans of our research.

## SUPPORTING INFORMATION

### 1. Figure(s)

**Figure 1: Kaplan-Meier Survival analysis stratified by AKI-status at ICU admission.**

*Legends:* Time in days from ICU admission. AKI = Acute Kidney Injury, ICU = Intensive Care Unit.

**Figure 1: Kaplan-Meier survival analysis stratified by AKI-status at admission to ICU.**

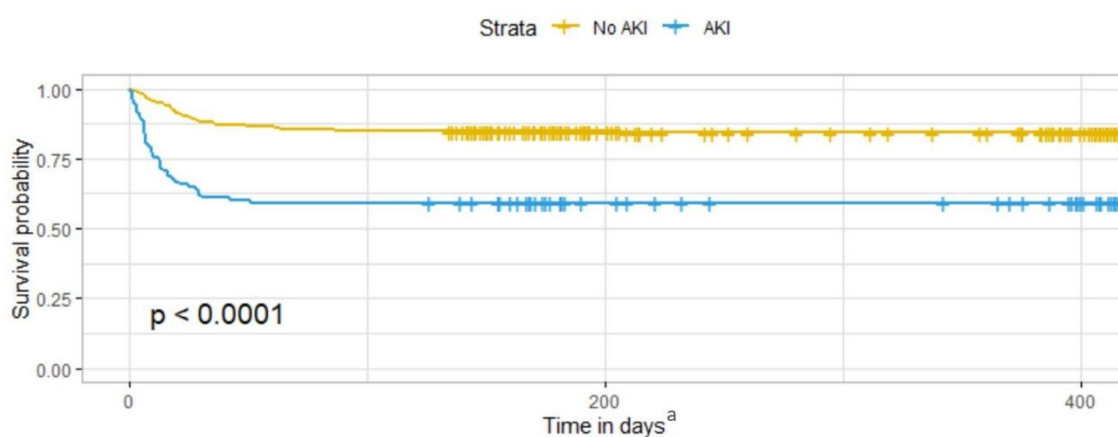

AKI = Acute Kidney Injury, ICU = Intensive Care Unit, <sup>a</sup>Time in days from ICU-admission,

## 2. Supplementary material

**S1 Table (Supplementary table): Odds for survival at 90 days.** *Legends:* OR = Odds Ratio, CI = Confidence Interval, CND = Chronic Neurological Disease, CVD = Cardiovascular Disease, DM = Diabetes Mellitus, CPD = Chronic Pulmonary Disease, ACEi = Angiotensin-Converting Enzyme-inhibitor, ARB = Angiotensin II Receptor Blocker, ACF = Acute Circulatory Failure, ARF = Acute Respiratory Failure, AKI = Acute Kidney Injury, ICU = Intensive Care Unit.

| Table S1: Odds for survival at 90 days. |             |                    |                  |                                   |                     |                  |
|-----------------------------------------|-------------|--------------------|------------------|-----------------------------------|---------------------|------------------|
| Univariate logistic regression          |             |                    |                  | Multivariable logistic regression |                     |                  |
| Variable                                | OR          | 95% CI             | <i>p</i> -value  | OR                                | 95% CI              | <i>p</i> -value  |
| Immunocompromised                       | 0.21        | 0.01 - 1.07        | 0.135            |                                   |                     |                  |
| Liver disease                           | 1.67        | 0.08 - 17.65       | 0.678            |                                   |                     |                  |
| Cancer                                  | 2.32        | 0.75 - 6.64        | 0.123            |                                   |                     |                  |
| CND                                     | 0.32        | 0.02 - 1.73        | 0.285            |                                   |                     |                  |
| Current smoker                          | 0.95        | 0.14 - 4.02        | 0.947            |                                   |                     |                  |
| Gender                                  | 1.15        | 0.66 - 1.99        | 0.611            |                                   |                     |                  |
| Age                                     | 1.08        | 1.06 - 1.11        | <b>&lt;0.000</b> | 1.08                              | 1.04 - 1.11         | <b>&lt;0.000</b> |
| CVD                                     | 2.25        | 1.35 - 3.79        | <b>0.002</b>     | 0.72                              | 0.33 - 1.53         | 0.396            |
| DM                                      | 0.97        | 0.50 - 1.81        | 0.928            |                                   |                     |                  |
| Asthma                                  | 0.76        | 0.35 - 1.54        | 0.468            |                                   |                     |                  |
| CPD                                     | 3.26        | 1.57 - 6.71        | <b>0.001</b>     | 2.03                              | 0.79 - 5.23         | 0.139            |
| ACEi/ARB                                | 2.54        | 1.45 - 4.45        | <b>0.001</b>     | 1.94                              | 0.88 - 4.32         | 0.102            |
| ACF                                     | 1.78        | 1.53 - 2.10        | <b>&lt;0.000</b> | 1.72                              | 1.46 - 2.06         | <b>&lt;0.000</b> |
| ARF                                     | 1.31        | 0.96 - 2.00        | 0.133            |                                   |                     |                  |
| <b>AKI at ICU-admission</b>             | <b>3.90</b> | <b>2.31 - 6.67</b> | <b>&lt;0.000</b> | <b>3.14</b>                       | <b>1.66 - 6.00</b>  | <b>0.001</b>     |
| (Intercept)                             |             |                    |                  | <b>0.00</b>                       | <b>0.00 - 0.002</b> | <b>&lt;0.000</b> |

OR = Odds Ratio, CI = Confidence Interval, CND = Chronic Neurological Disease, CVD = Cardiovascular Disease, DM = Diabetes Mellitus, CPD = Chronic Pulmonary Disease, ACEi = Angiotensin-Converting Enzyme-inhibitor, ARB = Angiotensin II Receptor Blocker, ACF = Acute Circulatory Failure, ARF = Acute Respiratory Failure, AKI = Acute Kidney Injury, ICU = Intensive Care Unit.

**S2 Table** (Supplementary table): **Comparison of AKI definitions and staging criteria.**

*Legends:* AKI = Acute Kidney Injury, KDIGO = Kidney Disease, RIFLE =, SAPS II =, SCr = Serum Creatinine, GFR = Glomerular Filtration Rate, UO = Urine Output, BUN = Blood Urea Nitrogen, RRT = Renal Replacement Therapy, h = hours.

| Table S2: Comparison of AKI definitions and staging criteria                                                                                                                                                                                                                                                                                   |                                                                                          |                |                                                                                           |                                                                                     |               |            |                |
|------------------------------------------------------------------------------------------------------------------------------------------------------------------------------------------------------------------------------------------------------------------------------------------------------------------------------------------------|------------------------------------------------------------------------------------------|----------------|-------------------------------------------------------------------------------------------|-------------------------------------------------------------------------------------|---------------|------------|----------------|
| KDIGO                                                                                                                                                                                                                                                                                                                                          |                                                                                          | RIFLE          |                                                                                           |                                                                                     | Renal SAPS II |            |                |
| Stage                                                                                                                                                                                                                                                                                                                                          | SCr <sup>a</sup>                                                                         | Class          | SCr or GFR                                                                                | UO <sup>b</sup>                                                                     | Score         | UO/24 h    | BUN            |
|                                                                                                                                                                                                                                                                                                                                                |                                                                                          |                |                                                                                           |                                                                                     | <b>0</b>      | >1000 ml   | <10 mmol/L     |
| <b>1</b>                                                                                                                                                                                                                                                                                                                                       | 1.5-1.9x baseline<br>or<br>>26.5 μmol/L increase                                         | <b>Risk</b>    | SCr increase 1.5x baseline<br>or<br>eGFR decrease ≥25%                                    | <0.5ml/kg/h for 6 h                                                                 |               |            |                |
| <b>2</b>                                                                                                                                                                                                                                                                                                                                       | 2.0-2.9x baseline                                                                        | <b>Injury</b>  | SCr increase 2.0x baseline<br>or<br>eGFR decrease ≥50%                                    | <0.5 ml/kg/h for 12 h<br>(<840 ml/24 h <sup>c</sup> )                               | <b>4</b>      | 500-999 ml |                |
|                                                                                                                                                                                                                                                                                                                                                |                                                                                          |                |                                                                                           |                                                                                     | <b>6</b>      |            | 10-29.9 mmol/L |
| <b>3</b>                                                                                                                                                                                                                                                                                                                                       | ≥3.0x baseline<br>or<br>≥4 mg/dl (= 353.7 μmol/L)<br>increase<br>or<br>initiation of RRT | <b>Failure</b> | SCr increase ≥3.0x baseline<br>or<br>≥4 mg/dl (= 353.7 μmol/L)<br>or<br>GFR decrease ≥75% | <0.3 ml/kg/h for 24 h<br>(<504 ml/24 h <sup>c</sup> )<br>or<br>anuria for 12 hours. | <b>10</b>     |            | >30 mmol/L     |
|                                                                                                                                                                                                                                                                                                                                                |                                                                                          |                |                                                                                           |                                                                                     | <b>11</b>     | <500 ml    |                |
| <sup>a</sup> SCr-increase within 48 hours.<br><sup>b</sup> UO criteria are shared by KDIGO and RIFLE.<br><sup>c</sup> Standardized for a patient with a weight of 70 kg.                                                                                                                                                                       |                                                                                          |                |                                                                                           |                                                                                     |               |            |                |
| AKI = Acute Kidney Injury, KDIGO: Kidney Disease: Improving Global Outcomes, RIFLE: Risk, Injury, Failure, Loss, End-stage kidney disease, SAPS II = Simplified Acute Physiology Score II, SCr = Serum Creatinine, GFR = Glomerular Filtration Rate, UO = Urine Output, BUN = Blood Urea Nitrogen, RRT = Renal Replacement Therapy, h = hours. |                                                                                          |                |                                                                                           |                                                                                     |               |            |                |

**Table 1: Patient characteristics by AKI-status at ICU-admission.**

| <b>Patient demographics</b> | All patients<br>(N = 361) | Missing data<br>(No of<br>patients) | AKI<br>(n = 114)    | No AKI<br>(n = 242) | <i>p</i> -value<br>(AKI vs no AKI) |
|-----------------------------|---------------------------|-------------------------------------|---------------------|---------------------|------------------------------------|
| Age in years, median [IQR]  | 63.6 [53.5-72.5]          | -                                   | 65.6 [58.4-73.6]    | 61.6 [52.0-72.3]    | <b>0.003</b>                       |
| Height in cm, median [IQR]  | 174.0 [166.0-180.0]       | 138                                 | 175.0 [169.0-180.0] | 173.0 [165.0-180.0] | 0.258                              |
| Weight in kg, median [IQR]  | 85.0 [75.0-95.1]          | 90                                  | 83.0 [70.0-96.3]    | 85.2 [75.0-95.0]    | 0.418                              |
| BMI (CI), median [IQR]      | 27.7 [24.8-32.0]          | 141                                 | 27.3 [23.0-30.6]    | 28.3 [25.1-32.4]    | 0.132                              |
|                             | No of patients (%)        |                                     |                     |                     |                                    |
| BMI ≥30                     | 83 (37.7%)                | 141                                 | 21 (31.8%)          | 61 (40.4%)          | 0.147                              |
| Male                        | 261 (72.3%)               | -                                   | 86 (75.4%)          | 172 (71.1%)         | 0.233                              |
| Female                      | 100 (27.7%)               | -                                   | 28 (24.6%)          | 70 (28.9%)          | 0.233                              |
| Current smoker              | 9 (2.5%)                  | -                                   | 3 (2.6%)            | 6 (2.5%)            | 0.592                              |
| Comorbidity/ies             | 246 (68.1%)               | -                                   | 81 (71.1%)          | 161 (66.5%)         | 0.233                              |
| 1                           | 141 (39.1%)               | -                                   | 44 (38.6%)          | 94 (38.8%)          | 0.530                              |
| ≥2                          | 105 (29.1%)               | -                                   | 37 (32.5%)          | 67 (27.7%)          | 0.212                              |
| CVD                         | 158 (43.8%)               | -                                   | 58 (50.9%)          | 98 (40.5%)          | <b>0.042</b>                       |
| DM                          | 74 (20.5%)                | -                                   | 23 (20.2%)          | 50 (20.7%)          | 0.518                              |
| Asthma                      | 55 (15.2%)                | -                                   | 15 (13.2%)          | 39 (16.1%)          | 0.288                              |
| CPD                         | 37 (10.2%)                | -                                   | 14 (12.3%)          | 23 (9.5%)           | 0.266                              |
| Immunocompromised           | 20 (5.5%)                 | -                                   | 5 (4.4%)            | 14 (5.8%)           | 0.394                              |
| Cancer                      | 17 (4.7%)                 | -                                   | 6 (5.3%)            | 11 (4.5%)           | 0.476                              |
| CND                         | 12 (3.3%)                 | -                                   | 5 (4.4%)            | 7 (2.9%)            | 0.329                              |
| Liver disease               | 3 (0.8%)                  | -                                   | 1 (0.9%)            | 2 (0.8%)            | 0.687                              |
| ACEi/ARB                    | 83 (23.4%)                | 7                                   | 34 (30.6%)          | 47 (19.7%)          | <b>0.019</b>                       |

AKI = Acute Kidney Injury, ICU = Intensive Care Unit, IQR = Interquartile Range, BMI = Body Mass Index, CVD = Cardiovascular Disease, DM = Diabetes Mellitus, CPD = Chronic Pulmonary Disease, CND = Chronic Neurological Disease, ACEi = Angiotensin-Converting Enzyme-inhibitor, ARB = Angiotensin II Receptor Blocker.

Table 1: Patient characteristics by AKI-status at ICU admission.

109x97mm (300 x 300 DPI)

**Table 2: Laboratory findings and organ complications by AKI-status at ICU-admission.**

| <b>Variables</b>                        | All patients<br>(N = 361) | Missing data<br>(No of<br>patients) | AKI<br>(n= 114)   | No AKI<br>(n= 242) | <i>p</i> -value<br>(AKI vs No AKI) |
|-----------------------------------------|---------------------------|-------------------------------------|-------------------|--------------------|------------------------------------|
| SCr in $\mu\text{mol/l}$ , median [IQR] | 85.0 [70.3-104.0]         | 1                                   | 98.0 [73.5-128.0] | 80.5 [69.5-96.0]   | <0.000                             |
| Estimated baseline SCr, median [IQR]    | 92.5 [76.0-95.6]          | -                                   | 92.5 [85.0-94.5]  | 92.7 [75.3-96.1]   | 0.826                              |
| AKI at hospital-admission               | 105 (29.1%)               | 4                                   | 62 (54.4%)        | 42 (17.4%)         | <0.000                             |
| Severe ARF                              | 319 (88.6%)               | 1                                   | 103 (91.2%)       | 212 (87.2%)        | 0.213                              |
| Severe ACF                              | 124 (35.4%)               | 11                                  | 49 (45.0%)        | 74 (31.4%)         | 0.010                              |
| <b>Variables at ICU</b>                 |                           |                                     |                   |                    |                                    |
| GCS                                     |                           |                                     |                   |                    |                                    |
| 14-15                                   | 323 (89.5%)               | -                                   | 89 (78.1%)        | 229 (94.6%)        | <0.000                             |
| $\leq 13$                               | 38 (10.5%)                | -                                   | 25 (21.9%)        | 13 (5.4%)          | <0.000                             |
| SAPS II score, median [IQR]             | 34.0 [26.0-42.0]          | -                                   | 43.0 [37.0-50.0]  | 31.0 [24.0-36.0]   | <0.000                             |
| BUN in mmol/L                           |                           | 5                                   |                   |                    |                                    |
| <10                                     | 275 (77.2%)               | -                                   | 33 (28.9%)        | 242 (100.0%)       | <0.000                             |
| 10-29.9                                 | 79 (21.9%)                | -                                   | 79 (69.3%)        |                    |                                    |
| $\geq 30$                               | 2 (0.6%)                  | -                                   | 2 (1.8%)          |                    |                                    |
| UO in ml per 24 hours                   |                           |                                     |                   |                    |                                    |
| >1000                                   | 307 (85.0%)               | -                                   | 60 (52.6%)        | 242 (100.0%)       | <0.000                             |
| 500-999                                 | 35 (9.7%)                 | -                                   | 35 (30.7%)        |                    |                                    |
| <500                                    | 19 (5.3%)                 | -                                   | 19 (16.7%)        |                    |                                    |
| <b>AKI at ICU-admission</b>             | 114 (32.0%)               | 5                                   |                   |                    |                                    |

AKI = Acute Kidney Injury, ICU = Intensive Care Unit, SCr = Serum-Creatinine, IQR = Interquartile Range, ARF = Acute Respiratory Failure, ACF = Acute Circulatory Failure, GCS = Glasgow Coma Scale, SAPS II = Simplified Acute Physiology Score II, BUN = Blood Urea Nitrogen, UO = Urine Output.

Table 2: Laboratory findings and organ complications by AKI-status at ICU admission.

122x99mm (300 x 300 DPI)

**Table 3: Treatment and patient outcome by AKI-status at ICU-admission.**

| <b>Treatment</b>                    | All patients<br>(N = 361) | Missing data<br>(No of<br>patients) | AKI<br>(n = 114) | No AKI<br>(n = 242) | <i>p</i> -value<br>(AKI vs no AKI) |
|-------------------------------------|---------------------------|-------------------------------------|------------------|---------------------|------------------------------------|
| LOS in ICU, median [IQR]            | 11.6 [5.7-19.5]           | -                                   | 13.5 [5.9-25.6]  | 10.9 [5.7-19.0]     | 0.125                              |
| Mechanical ventilation <sup>a</sup> | 293 (81.2%)               | -                                   | 99 (86.8%)       | 192 (79.3%)         | 0.057                              |
| RRT                                 | 29 (8.0%)                 | -                                   | 16 (14.0%)       | 13 (5.4%)           | <b>0.006</b>                       |
| CRRT                                | 28 (7.8%)                 | -                                   | 15 (13.2%)       | 13 (5.4%)           | <b>0.012</b>                       |
| Median days [IQR]                   | 9.0 [5.0-14.0]            | -                                   | 8.0 [5.0-12.0]   | 11.5 [5.5-16.3]     | 0.863                              |
| IRRT                                | 7 (1.9%)                  | -                                   | 6 (5.3%)         | 0 (0.0%)            | <b>0.001</b>                       |
| Median days [IQR]                   | 6.5 [5.0-7.5]             | -                                   | 6.5 [5.0-7.5]    | -                   | -                                  |
| <b>Outcome</b>                      |                           |                                     |                  |                     |                                    |
| Survival first 24 hours in ICU      | 358 (99.2%)               | -                                   | 111 (97.4%)      | 242 (100.0%)        | <b>0.032</b>                       |
| Survival at hospital discharge      | 295 (81.7%)               | -                                   | 80 (70.2%)       | 210 (86.8%)         | <b>&lt;0.000</b>                   |
| Survival at 30 days                 | 298 (82.5%)               | -                                   | 77 (67.5%)       | 217 (89.7%)         | <b>&lt;0.000</b>                   |
| Survival at 90 days                 | 280 (77.6%)               | -                                   | 70 (61.4%)       | 206 (85.1%)         | <b>&lt;0.000</b>                   |

AKI = Acute Kidney Injury, ICU = Intensive Care Unit, LOS = Length of stay, IQR = Interquartile Range, RRT = Renal Replacement Therapy, CRRT = Continuous Renal Replacement Therapy, IRRT = Intermittent Renal Replacement Therapy.

Table 3: Treatment and patient outcome by AKI-status at ICU admission.

163x97mm (300 x 300 DPI)

Table 4: Odds for AKI at ICU-admission.

| Univariate logistic regression |      |              |              | Multivariable logistic regression |             |                  |
|--------------------------------|------|--------------|--------------|-----------------------------------|-------------|------------------|
| Variable                       | OR   | 95% CI       | p-value      | OR                                | 95% CI      | p-value          |
| Immunocompromised              | 0.50 | 0.11 - 1.58  | 0.281        |                                   |             |                  |
| Liver disease                  | 1.11 | 0.05 - 11.67 | 0.935        |                                   |             |                  |
| Cancer                         | 0.80 | 0.22 - 2.39  | 0.701        |                                   |             |                  |
| CND                            | 1.27 | 0.33 - 4.31  | 0.705        |                                   |             |                  |
| Current smoker                 | 1.11 | 0.23 - 4.29  | 0.886        |                                   |             |                  |
| Gender                         | 0.88 | 0.52 - 1.46  | 0.619        |                                   |             |                  |
| Age                            | 1.02 | 1.01 - 1.04  | <b>0.013</b> | 1.02                              | 1.00 - 1.04 | 0.121            |
| CVD                            | 1.50 | 0.94 - 2.38  | 0.089        | 1.00                              | 0.56 - 1.78 | 0.996            |
| DM                             | 0.95 | 0.52 - 1.69  | 0.867        |                                   |             |                  |
| Asthma                         | 0.79 | 0.39 - 1.49  | 0.474        |                                   |             |                  |
| CPD                            | 1.17 | 0.54 - 2.42  | 0.673        |                                   |             |                  |
| ACEi/ARB                       | 1.77 | 1.04 - 3.00  | <b>0.033</b> | 1.52                              | 0.82 - 2.83 | 0.187            |
| ACF                            | 1.21 | 1.07 - 1.37  | <b>0.002</b> | 1.19                              | 1.05 - 1.35 | <b>0.006</b>     |
| ARF                            | 1.08 | 0.85 - 1.42  | 0.561        |                                   |             |                  |
| (Intercept)                    |      |              |              | 0.09                              | 0.03 - 0.31 | <b>&lt;0.000</b> |

AKI = Acute Kidney Injury, ICU = Intensive Care Unit, OR = Odds Ratio, CI = Confidence Interval, CND = Chronic Neurological Disease, CVD = Cardiovascular Disease, DM = Diabetes Mellitus, CPD = Chronic Pulmonary Disease, ACEi = Angiotensin-Converting Enzyme-inhibitor, ARB = Angiotensin II Receptor Blocker, ACF = Acute Circulatory Failure, ARF = Acute Respiratory Failure.

Table 4: Odds for AKI at ICU-admission.

135x98mm (300 x 300 DPI)



Table 5: Odds for survival at 30 days.

| Univariate logistic regression |      |              |                  | Multivariable logistic regression |              |                  |
|--------------------------------|------|--------------|------------------|-----------------------------------|--------------|------------------|
| Variable                       | OR   | 95% CI       | p-value          | OR                                | 95% CI       | p-value          |
| Immunocompromised              | 0.29 | 0.02 - 1.47  | 0.235            |                                   |              |                  |
| Liver disease                  | 2.28 | 0.11 - 24.21 | 0.503            |                                   |              |                  |
| Cancer                         | 3.24 | 1.05 - 9.35  | <b>0.032</b>     | 4.39                              | 1.17 - 15.90 | <b>0.024</b>     |
| CND                            | 0.44 | 0.02 - 2.38  | 0.442            |                                   |              |                  |
| Current smoker                 | 1.30 | 0.19 - 5.55  | 0.746            |                                   |              |                  |
| Gender                         | 1.54 | 0.85 - 2.75  | 0.149            |                                   |              |                  |
| Age                            | 1.08 | 1.05 - 1.11  | <b>&lt;0.000</b> | 1.07                              | 1.04 - 1.11  | <b>&lt;0.000</b> |
| CVD                            | 2.33 | 1.33 - 4.15  | <b>0.004</b>     | 0.93                              | 0.40 - 2.11  | 0.857            |
| DM                             | 1.14 | 0.56 - 2.20  | 0.707            |                                   |              |                  |
| Asthma                         | 1.09 | 0.49 - 2.25  | 0.818            |                                   |              |                  |
| CPD                            | 4.17 | 1.97 - 8.73  | <b>&lt;0.000</b> | 2.50                              | 0.98 - 6.43  | 0.055            |
| ACEi/ARB                       | 2.02 | 1.09 - 3.66  | <b>0.023</b>     | 1.24                              | 0.53 - 2.89  | 0.625            |
| ACF                            | 1.78 | 1.50 - 2.14  | <b>&lt;0.000</b> | 1.70                              | 1.41 - 2.09  | <b>&lt;0.000</b> |
| ARF                            | 1.18 | 0.87 - 1.79  | 0.349            |                                   |              |                  |
| <b>AKI at ICU-admission</b>    | 4.32 | 2.44 - 7.78  | <b>&lt;0.000</b> | 3.78                              | 1.90 - 7.67  | <b>&lt;0.000</b> |
| (Intercept)                    |      |              |                  | 0.00                              | 0.00 - 0.002 | <b>&lt;0.000</b> |

OR = Odds Ratio, CI = Confidence Interval, CND = Chronic Neurological Disease, CVD = Cardiovascular Disease, DM = Diabetes Mellitus, CPD = Chronic Pulmonary Disease, ACEi = Angiotensin-Converting Enzyme-inhibitor, ARB = Angiotensin II Receptor Blocker, ACF = Acute Circulatory Failure, ARF = Acute Respiratory Failure, AKI = Acute Kidney Injury, ICU = Intensive Care Unit.

Table 5: Odds for survival at 30 days.

140x106mm (300 x 300 DPI)

Figure 1: Kaplan-Meier survival analysis stratified by AKI-status at admission to ICU.

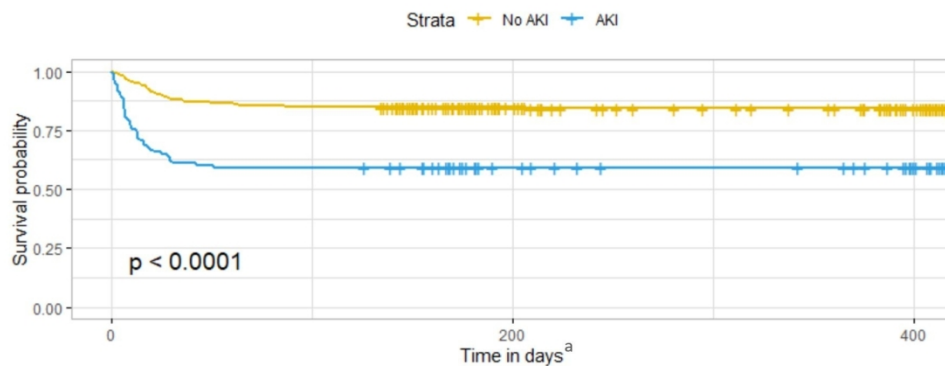

AKI = Acute Kidney Injury, ICU = Intensive Care Unit, <sup>a</sup>Time in days from ICU-admission,

Figure 1: Kaplan-Meier Survival analysis stratified by AKI-status at ICU admission.

156x82mm (300 x 300 DPI)

**Table S1: Odds for survival at 90 days.**

| <b>Univariate logistic regression</b> |      |              |                  | <b>Multivariable logistic regression</b> |              |                  |
|---------------------------------------|------|--------------|------------------|------------------------------------------|--------------|------------------|
| Variable                              | OR   | 95% CI       | <i>p</i> -value  | OR                                       | 95% CI       | <i>p</i> -value  |
| Immunocompromised                     | 0.21 | 0.01 - 1.07  | 0.135            |                                          |              |                  |
| Liver disease                         | 1.67 | 0.08 - 17.65 | 0.678            |                                          |              |                  |
| Cancer                                | 2.32 | 0.75 - 6.64  | 0.123            |                                          |              |                  |
| CND                                   | 0.32 | 0.02 - 1.73  | 0.285            |                                          |              |                  |
| Current smoker                        | 0.95 | 0.14 - 4.02  | 0.947            |                                          |              |                  |
| Gender                                | 1.15 | 0.66 - 1.99  | 0.611            |                                          |              |                  |
| Age                                   | 1.08 | 1.06 - 1.11  | <b>&lt;0.000</b> | 1.08                                     | 1.04 - 1.11  | <b>&lt;0.000</b> |
| CVD                                   | 2.25 | 1.35 - 3.79  | <b>0.002</b>     | 0.72                                     | 0.33 - 1.53  | 0.396            |
| DM                                    | 0.97 | 0.50 - 1.81  | 0.928            |                                          |              |                  |
| Asthma                                | 0.76 | 0.35 - 1.54  | 0.468            |                                          |              |                  |
| CPD                                   | 3.26 | 1.57 - 6.71  | <b>0.001</b>     | 2.03                                     | 0.79 - 5.23  | 0.139            |
| ACEi/ARB                              | 2.54 | 1.45 - 4.45  | <b>0.001</b>     | 1.94                                     | 0.88 - 4.32  | 0.102            |
| ACF                                   | 1.78 | 1.53 - 2.10  | <b>&lt;0.000</b> | 1.72                                     | 1.46 - 2.06  | <b>&lt;0.000</b> |
| ARF                                   | 1.31 | 0.96 - 2.00  | 0.133            |                                          |              |                  |
| <b>AKI at ICU-admission</b>           | 3.90 | 2.31 - 6.67  | <b>&lt;0.000</b> | 3.14                                     | 1.66 - 6.00  | <b>0.001</b>     |
| (Intercept)                           |      |              |                  | 0.00                                     | 0.00 - 0.002 | <b>&lt;0.000</b> |

OR = Odds Ratio, CI = Confidence Interval, CND = Chronic Neurological Disease, CVD = Cardiovascular Disease, DM = Diabetes Mellitus, CPD = Chronic Pulmonary Disease, ACEi = Angiotensin-Converting Enzyme-inhibitor, ARB = Angiotensin II Receptor Blocker, ACF = Acute Circulatory Failure, ARF = Acute Respiratory Failure, AKI = Acute Kidney Injury, ICU = Intensive Care Unit.

(Supplementary) Table S1: Odds for survival at 90 days.

129x98mm (300 x 300 DPI)

Table S2: Comparison of AKI definitions and staging criteria

| KDIGO                                                                                                                                                                                                                                                                                                                                          |                                                                                          | RIFLE   |                                                                                           |                                                                                     | Renal SAPS II |            |                |
|------------------------------------------------------------------------------------------------------------------------------------------------------------------------------------------------------------------------------------------------------------------------------------------------------------------------------------------------|------------------------------------------------------------------------------------------|---------|-------------------------------------------------------------------------------------------|-------------------------------------------------------------------------------------|---------------|------------|----------------|
| Stage                                                                                                                                                                                                                                                                                                                                          | SCr <sup>a</sup>                                                                         | Class   | SCr or GFR                                                                                | UO <sup>b</sup>                                                                     | Score         | UO/24 h    | BUN            |
|                                                                                                                                                                                                                                                                                                                                                |                                                                                          |         |                                                                                           |                                                                                     | 0             | >1000 ml   | <10 mmol/L     |
| 1                                                                                                                                                                                                                                                                                                                                              | 1.5-1.9x baseline<br>or<br>>26.5 µmol/L increase                                         | Risk    | SCr increase 1.5x baseline<br>or<br>eGFR decrease ≥25%                                    | <0.5ml/kg/h for 6 h                                                                 |               |            |                |
| 2                                                                                                                                                                                                                                                                                                                                              | 2.0-2.9x baseline                                                                        | Injury  | SCr increase 2.0x baseline<br>or<br>eGFR decrease ≥50%                                    | <0.5 ml/kg/h for 12 h<br>(<840 ml/24 h <sup>c</sup> )                               | 4             | 500-999 ml |                |
|                                                                                                                                                                                                                                                                                                                                                |                                                                                          |         |                                                                                           |                                                                                     | 6             |            | 10-29.9 mmol/L |
| 3                                                                                                                                                                                                                                                                                                                                              | ≥3.0x baseline<br>or<br>≥4 mg/dl (= 353.7 µmol/L)<br>increase<br>or<br>initiation of RRT | Failure | SCr increase ≥3.0x baseline<br>or<br>≥4 mg/dl (= 353.7 µmol/L)<br>or<br>GFR decrease ≥75% | <0.3 ml/kg/h for 24 h<br>(<504 ml/24 h <sup>c</sup> )<br>or<br>anuria for 12 hours. | 10            |            | >30 mmol/L     |
|                                                                                                                                                                                                                                                                                                                                                |                                                                                          |         |                                                                                           |                                                                                     | 11            | <500 ml    |                |
| <sup>a</sup> SCr-increase within 48 hours.<br><sup>b</sup> UO criteria are shared by KDIGO and RIFLE.<br><sup>c</sup> Standardized for a patient with a weight of 70 kg.                                                                                                                                                                       |                                                                                          |         |                                                                                           |                                                                                     |               |            |                |
| AKI = Acute Kidney Injury, KDIGO: Kidney Disease: Improving Global Outcomes, RIFLE: Risk, Injury, Failure, Loss, End-stage kidney disease, SAPS II = Simplified Acute Physiology Score II, SCr = Serum Creatinine, GFR = Glomerular Filtration Rate, UO = Urine Output, BUN = Blood Urea Nitrogen, RRT = Renal Replacement Therapy, h = hours. |                                                                                          |         |                                                                                           |                                                                                     |               |            |                |

(Supplementary) Table S2: Comparison of AKI definitions and staging criteria.

194x125mm (300 x 300 DPI)

**STROBE Statement**—Checklist of items that should be included in reports of *cohort studies*

For article:

“Acute Kidney Injury in COVID-19 patients in the Intensive Care Unit. Evaluation of risk factors and mortality in a national cohort.”

|                              | Item No | Recommendation                                                                                                                                                                                                                                                                                                         | Page No |
|------------------------------|---------|------------------------------------------------------------------------------------------------------------------------------------------------------------------------------------------------------------------------------------------------------------------------------------------------------------------------|---------|
| <b>Title and abstract</b>    | 1       | (a) Indicate the study’s design with a commonly used term in the title or the abstract<br>(b) Provide in the abstract an informative and balanced summary of what was done and what was found                                                                                                                          | 1-2     |
| <b>Introduction</b>          |         |                                                                                                                                                                                                                                                                                                                        |         |
| Background/rationale         | 2       | Explain the scientific background and rationale for the investigation being reported                                                                                                                                                                                                                                   | 4       |
| Objectives                   | 3       | State specific objectives, including any prespecified hypotheses                                                                                                                                                                                                                                                       | 4       |
| <b>Methods</b>               |         |                                                                                                                                                                                                                                                                                                                        |         |
| Study design                 | 4       | Present key elements of study design early in the paper                                                                                                                                                                                                                                                                | (4-)5   |
| Setting                      | 5       | Describe the setting, locations, and relevant dates, including periods of recruitment, exposure, follow-up, and data collection                                                                                                                                                                                        | 5       |
| Participants                 | 6       | (a) Give the eligibility criteria, and the sources and methods of selection of participants. Describe methods of follow-up<br>(b) For matched studies, give matching criteria and number of exposed and unexposed                                                                                                      | 5       |
| Variables                    | 7       | Clearly define all outcomes, exposures, predictors, potential confounders, and effect modifiers. Give diagnostic criteria, if applicable                                                                                                                                                                               | 5-6     |
| Data sources/<br>measurement | 8*      | For each variable of interest, give sources of data and details of methods of assessment (measurement). Describe comparability of assessment methods if there is more than one group                                                                                                                                   | 6-7     |
| Bias                         | 9       | Describe any efforts to address potential sources of bias                                                                                                                                                                                                                                                              | 5-7     |
| Study size                   | 10      | Explain how the study size was arrived at                                                                                                                                                                                                                                                                              | 5       |
| Quantitative variables       | 11      | Explain how quantitative variables were handled in the analyses. If applicable, describe which groupings were chosen and why                                                                                                                                                                                           | 6-7     |
| Statistical methods          | 12      | (a) Describe all statistical methods, including those used to control for confounding<br>(b) Describe any methods used to examine subgroups and interactions<br>(c) Explain how missing data were addressed<br>(d) If applicable, explain how loss to follow-up was addressed<br>(e) Describe any sensitivity analyses | 6-7     |
| <b>Results</b>               |         |                                                                                                                                                                                                                                                                                                                        |         |
| Participants                 | 13*     | (a) Report numbers of individuals at each stage of study—eg numbers potentially eligible, examined for eligibility, confirmed eligible, included in the study, completing follow-up, and analysed<br>(b) Give reasons for non-participation at each stage<br>(c) Consider use of a flow diagram                        | 8       |
| Descriptive data             | 14*     | (a) Give characteristics of study participants (eg demographic, clinical, social) and information on exposures and potential confounders                                                                                                                                                                               | 8-11    |

|                          |     |                                                                                                                                                                                                                                                                                                                                                                                                               |       |
|--------------------------|-----|---------------------------------------------------------------------------------------------------------------------------------------------------------------------------------------------------------------------------------------------------------------------------------------------------------------------------------------------------------------------------------------------------------------|-------|
|                          |     | (b) Indicate number of participants with missing data for each variable of interest<br>(c) Summarise follow-up time (eg, average and total amount)                                                                                                                                                                                                                                                            |       |
| Outcome data             | 15* | Report numbers of outcome events or summary measures over time                                                                                                                                                                                                                                                                                                                                                | 10-13 |
| Main results             | 16  | (a) Give unadjusted estimates and, if applicable, confounder-adjusted estimates and their precision (eg, 95% confidence interval). Make clear which confounders were adjusted for and why they were included<br>(b) Report category boundaries when continuous variables were categorized<br>(c) If relevant, consider translating estimates of relative risk into absolute risk for a meaningful time period | 11-13 |
| Other analyses           | 17  | Report other analyses done—eg analyses of subgroups and interactions, and sensitivity analyses                                                                                                                                                                                                                                                                                                                | 13    |
| <b>Discussion</b>        |     |                                                                                                                                                                                                                                                                                                                                                                                                               |       |
| Key results              | 18  | Summarise key results with reference to study objectives                                                                                                                                                                                                                                                                                                                                                      | 14    |
| Limitations              | 19  | Discuss limitations of the study, taking into account sources of potential bias or imprecision. Discuss both direction and magnitude of any potential bias                                                                                                                                                                                                                                                    | 14-16 |
| Interpretation           | 20  | Give a cautious overall interpretation of results considering objectives, limitations, multiplicity of analyses, results from similar studies, and other relevant evidence                                                                                                                                                                                                                                    | 14-16 |
| Generalisability         | 21  | Discuss the generalisability (external validity) of the study results                                                                                                                                                                                                                                                                                                                                         | 16    |
| <b>Other information</b> |     |                                                                                                                                                                                                                                                                                                                                                                                                               |       |
| Funding                  | 22  | Give the source of funding and the role of the funders for the present study and, if applicable, for the original study on which the present article is based                                                                                                                                                                                                                                                 | 22    |

\*Give information separately for exposed and unexposed groups.

**Note:** An Explanation and Elaboration article discusses each checklist item and gives methodological background and published examples of transparent reporting. The STROBE checklist is best used in conjunction with this article (freely available on the Web sites of PLoS Medicine at <http://www.plosmedicine.org/>, Annals of Internal Medicine at <http://www.annals.org/>, and Epidemiology at <http://www.epidem.com/>). Information on the STROBE Initiative is available at <http://www.strobe-statement.org>.

# BMJ Open

## Acute Kidney Injury in COVID-19 patients in the Intensive Care Unit. Evaluation of risk factors and mortality in a national cohort.

|                                 |                                                                                                                                                                                                                                                                                                                                                                                                                                                                                                                                                                                                                                                                                                                 |
|---------------------------------|-----------------------------------------------------------------------------------------------------------------------------------------------------------------------------------------------------------------------------------------------------------------------------------------------------------------------------------------------------------------------------------------------------------------------------------------------------------------------------------------------------------------------------------------------------------------------------------------------------------------------------------------------------------------------------------------------------------------|
| Journal:                        | <i>BMJ Open</i>                                                                                                                                                                                                                                                                                                                                                                                                                                                                                                                                                                                                                                                                                                 |
| Manuscript ID                   | bmjopen-2021-059046.R1                                                                                                                                                                                                                                                                                                                                                                                                                                                                                                                                                                                                                                                                                          |
| Article Type:                   | Original research                                                                                                                                                                                                                                                                                                                                                                                                                                                                                                                                                                                                                                                                                               |
| Date Submitted by the Author:   | 31-Mar-2022                                                                                                                                                                                                                                                                                                                                                                                                                                                                                                                                                                                                                                                                                                     |
| Complete List of Authors:       | Aukland, Eirik; Norwegian University of Science and Technology, Faculty of Medicine and Health Sciences<br>Klepstad, Pål; Norwegian University of Science and Technology, Department of Circulation and Medical Imaging; St Olavs Hospital Trondheim University Hospital, Department of Anesthesia and Intensive Care Medicine<br>Aukland, Stein Magnus; Haukeland University Hospital, Department of Radiology; University of Bergen, Department of Clinical Medicine<br>Ghavidel, Fatemeh; Haukeland University Hospital, Department of Research and Development<br>Buanes, Eirik; Norwegian Intensive Care and Pandemic Registry; Haukeland University Hospital, Department of Anesthesia and Intensive Care |
| <b>Primary Subject Heading</b>: | Intensive care                                                                                                                                                                                                                                                                                                                                                                                                                                                                                                                                                                                                                                                                                                  |
| Secondary Subject Heading:      | Intensive care                                                                                                                                                                                                                                                                                                                                                                                                                                                                                                                                                                                                                                                                                                  |
| Keywords:                       | COVID-19, Acute renal failure < NEPHROLOGY, Adult intensive & critical care < INTENSIVE & CRITICAL CARE                                                                                                                                                                                                                                                                                                                                                                                                                                                                                                                                                                                                         |
|                                 |                                                                                                                                                                                                                                                                                                                                                                                                                                                                                                                                                                                                                                                                                                                 |

SCHOLARONE™  
Manuscripts



I, the Submitting Author has the right to grant and does grant on behalf of all authors of the Work (as defined in the below author licence), an exclusive licence and/or a non-exclusive licence for contributions from authors who are: i) UK Crown employees; ii) where BMJ has agreed a CC-BY licence shall apply, and/or iii) in accordance with the terms applicable for US Federal Government officers or employees acting as part of their official duties; on a worldwide, perpetual, irrevocable, royalty-free basis to BMJ Publishing Group Ltd ("BMJ") its licensees and where the relevant Journal is co-owned by BMJ to the co-owners of the Journal, to publish the Work in this journal and any other BMJ products and to exploit all rights, as set out in our [licence](#).

The Submitting Author accepts and understands that any supply made under these terms is made by BMJ to the Submitting Author unless you are acting as an employee on behalf of your employer or a postgraduate student of an affiliated institution which is paying any applicable article publishing charge ("APC") for Open Access articles. Where the Submitting Author wishes to make the Work available on an Open Access basis (and intends to pay the relevant APC), the terms of reuse of such Open Access shall be governed by a Creative Commons licence – details of these licences and which [Creative Commons](#) licence will apply to this Work are set out in our licence referred to above.

Other than as permitted in any relevant BMJ Author's Self Archiving Policies, I confirm this Work has not been accepted for publication elsewhere, is not being considered for publication elsewhere and does not duplicate material already published. I confirm all authors consent to publication of this Work and authorise the granting of this licence.



1  
2  
3 Long title:  
4

5 Acute Kidney Injury in COVID-19 patients in the Intensive Care  
6 Unit. Evaluation of risk factors and mortality in a national cohort.  
7  
8

9  
10  
11 Short title: Acute Kidney Injury in ICU-treated COVID-19 patients.  
12

13  
14 Eirik Aasen Aukland<sup>1\*</sup>, Pål Klepstad<sup>2</sup>, Stein Magnus Aukland<sup>3</sup>, Fatemeh Zamanzad  
15 Ghavidel<sup>4</sup>, Eirik Alnes Buanes<sup>5</sup>  
16  
17

18  
19  
20 <sup>1</sup>*Faculty of Medicine and Health Sciences, Norwegian University of Science and Technology*  
21 *(NTNU), Trondheim, Norway.*

22  
23 <sup>2</sup>*Department of Circulation and Medical Imaging, NTNU; Department of Anesthesia and*  
24 *Intensive Care Medicine, St Olav University Hospital, Trondheim, Norway.*

25  
26 <sup>3</sup>*Department of Radiology, Haukeland University Hospital; Department of Clinical*  
27 *Medicine, University of Bergen, Bergen, Norway.*

28  
29 <sup>4</sup>*Department of Research and Development, Haukeland University Hospital, Bergen,*  
30 *Norway.*

31  
32 <sup>5</sup>*Norwegian Intensive Care and Pandemic Registry; Department of Anesthesia and Intensive*  
33 *Care, Haukeland University Hospital, Bergen, Norway.*  
34  
35  
36  
37  
38

39 **\* Corresponding author**

40 e-mail address (primary): eirik\_aukland@hotmail.com

41 e-mail address (secondary): eirikaau@stud.ntnu.no  
42  
43  
44  
45

46 **Keywords:** COVID-19, acute renal failure, adult intensive & critical care  
47  
48

49 **Word count** (excludes the title page, abstract, tables, acknowledgements, contributions and  
50 references): 3374  
51  
52  
53

54 **Number of tables:** 5

55 **Number of figures:** 1

56 **Number of supplementary tables:** 4  
57  
58  
59  
60

## ABSTRACT

**Objectives:** Acute kidney injury (AKI) is a frequent complication among critical ill patients with COVID-19, but the actual incidence is unknown as AKI-incidence varies from 25 to 89% in intensive care unit (ICU) populations. We aimed to describe the prevalence and risk factors of AKI in COVID-19 patients admitted to ICU in Norway.

**Design:** Nation-wide observational study with data sampled from the Norwegian Intensive Care and Pandemic Registry (NIPaR) for the period between March 10<sup>th</sup> until December 31<sup>st</sup>, 2020.

**Setting:** ICU patients with COVID-19 in Norway. NIPaR collects data on intensive care stays covering more than 90% of Norwegian ICU and 98% of ICU stays.

**Participants:** Adult COVID-19 patients admitted to Norwegian ICU were included in the study. Patients with Chronic Kidney Disease (CKD) were excluded in order to avoid bias from CKD on the incidence of AKI.

**Primary and secondary outcome measures:** Primary outcome was AKI at ICU admission as defined by renal SAPS-II score in NIPaR. Secondary outcome measures included survival at 30 and 90 days after admission to hospital.

**Results:** A total number of 361 COVID-19 patients were included in the analysis. AKI was present in 32.0% of the patients at ICU admission. The risk for AKI at ICU admission was related to acute circulatory failure at admission to hospital. Survival for the study population at 30 and 90 days was 82.5% and 77.6%, respectively. Cancer was a predictor of 30-day mortality. Age, acute circulatory failure at hospital admission and AKI at ICU admission were predictors of both 30- and 90-day mortality.

**Conclusions:** A high number of COVID-19 patients had AKI at ICU admission. The study indicates that AKI at ICU admission was related to acute circulatory failure at hospital admission. Age, acute circulatory failure at hospital admission and AKI at ICU admission were associated with mortality.

## ARTICLE SUMMARY

### Strength and limitations of this study

- The study is a national cohort of Norwegian COVID-19 patients admitted to ICUs in the study period.
- The study has few missing data, and the inclusion rate is high.
- The health system functioned within capacity during the study period, which renders that results are less likely to be biased due to capacity strains.
- AKI in the ICU was defined according to renal SAPS II score and does not fully comply with the RIFLE or KDIGO criteria due to the lack of creatinine-based measures of kidney function in the registry.
- While the study provides complete data on AKI at ICU-admission, it does not present the ICU trajectory of AKI in COVID-19 patients.

## INTRODUCTION

COVID-19, an infectious disease caused by the novel coronavirus Severe Acute Respiratory Syndrome Coronavirus 2 (SARS-CoV-2), has quickly developed into a pandemic since the early outbreak in Wuhan, China, in December 2019 <sup>1</sup>.

Several studies report Acute Kidney Injury (AKI) among hospitalized COVID-19 patients while less data is obtained exclusively in Intensive Care Unit (ICU) patients <sup>2-10</sup>. To our knowledge, previous studies are not based upon all ICU admissions within a large population. Furthermore, there is a call from the consensus report on COVID-19 associated AKI published by the 25<sup>th</sup> Acute Dialysis Quality Initiative (ADQI) Workgroup that studies should “incorporate the information about the proportion of different comorbidities in patients with and without AKI, including potential risk factors for the development of AKI” <sup>11</sup>.

National registries in Norway provide opportunities to perform nationwide registry studies in order to answer calls such as the one from the ADQI workgroup. The strength of such registry-based studies is that they are based on larger patient cohorts which make results more robust and generalizable. The drawback is that registry data set seldom are a direct fit for the research in question, making adaptations and extrapolations necessary.

This study is based on data available from the Norwegian Intensive Care and Pandemic Registry (NIPaR). NIPaR is a government funded national health registry constituted of two parts; the Norwegian Intensive Care Registry established in 1998, and the Norwegian Pandemic Registry established in March 2020 <sup>12</sup>. Registration is mandatory, and data is entered by hospital staff. For patients with COVID-19 in the ICU we report the prevalence of AKI, factors associated with AKI and the association between AKI and mortality.

## METHODS

The Norwegian Intensive Care and Pandemic Registry (NIPaR) contains two patient populations. NIPaR collects data on intensive care stays in pre-defined ICU, covering more than 90% of Norwegian ICU and 98% of ICU stays<sup>13</sup>. Qualification criteria for ICU and intensive care patients are defined by NIPaR<sup>14</sup>. The Norwegian Pandemic Registry includes patients admitted to hospital in Norway with a positive PCR test for SARS-CoV-2 during the previous 3 months, and includes 99% of pandemic patients admitted to hospital<sup>13</sup>. Both registry parts employ automatic and manual validation to ensure data quality.

The study group included COVID-19 patients above the age of 18 years admitted to ICU in the period between March 10<sup>th</sup>, 2020 (the initial outbreak of SARS-CoV-2 in Norway), until December 31<sup>st</sup>, 2020. Patients with Chronic Kidney Disease (CKD), defined as previously diagnosed kidney disease upon hospital admission, were excluded in order to avoid bias from CKD on the effects of AKI.

Data collection at hospital admission included age, gender, height, weight, comorbidities, pregnancy, regular medication of Angiotensin-Converting Enzyme-inhibitor (ACEi) or Angiotensin II Receptor Blocker (ARB), smoking, S-Creatinine (SCr), organ complications at hospital admission (Acute Kidney Injury [AKI], Acute Respiratory Failure [ARF], Acute Circulatory Failure [ACF] recorded at the discretion of the attending physician).

Data collection from the ICU stay included primary reason for referral to ICU, clinical scoring systems in the ICU (Glasgow Coma Scale [GCS], SAPSII-score), length of stay (LOS), mechanical ventilation, Renal Replacement Therapy (RRT) (Intermittent [IRRT] and Continuous [CRRT]), and survival (ICU first 24 hours, in-hospital at ICU and at 30 and 90 days after admission to hospital).

### Definitions

Due to lack of variables, it was not possible to employ creatinine values to define AKI in the ICU. The only available marker for renal function in the Norwegian Intensive Care Registry is contained within the Simplified Acute Physiology Score (SAPS II)<sup>15</sup>. As a result, renal Simplified Acute Physiology Score II (rSAPSII) is the sole marker for AKI during ICU stay in this study. AKI in the ICU was defined as rSAPSII score of  $\geq 4$  (Urine Output/24 h <1000

1  
2  
3 ml and/or Blood Urea Nitrogen >10 mmol/L). SAPS II is based on observations within the  
4 first 24 hours in the ICU.  
5  
6  
7

8 While AKI at ICU-admission was defined according to rSAPSII score, AKI at admission to  
9 hospital was defined according to RIFLE-criteria. A serum creatinine increase of >1.5x  
10 baseline was available as a separate variable (RIFLE Risk-category). For missing data, AKI  
11 at hospital admission was based on serum creatinine at hospital admission and the MDRD  
12 equation for estimating baseline creatinine. An estimated Glomerular Filtration Rate (GFR)  
13 of 75 ml/min/1.73m<sup>2</sup> was used to calculate baseline creatinine<sup>16</sup>. Data on ethnicity was not  
14 available for input in the equation.  
15  
16  
17  
18  
19  
20  
21

22 Acute Circulatory Failure (ACF) at admission to hospital was defined as acute deterioration  
23 in the patient circulation as compared to normal state, resulting in circulatory symptoms in  
24 high, moderate or light exertion or in rest. This includes cardiac arrhythmia, symptoms of heart  
25 failure and/or cardiac ischemia, regardless of vasopressor or inotrope treatment. Severe ACF  
26 was defined as circulatory symptoms in rest.  
27  
28  
29  
30  
31

32 Acute Respiratory Failure (ARF) at admission to hospital was defined as acute deterioration  
33 of respiratory function at admission to hospital as compared to normal state, resulting in  
34 respiratory symptoms in high, moderate or light exertion or in rest. This includes all  
35 conditions which can cause acute deterioration of respiratory function, including bacterial,  
36 viral, or cryptogenic pneumoniae, acute respiratory distress syndrome (ARDS),  
37 pneumothorax, pleural fluid, and bronchiolitis. Severe ARF was defined as respiratory  
38 symptoms in rest.  
39  
40  
41  
42  
43  
44  
45

46 Comorbidities are defined as pre-existing diagnoses upon admission to hospital.

47 Comorbidities included Chronic Pulmonary Disease (CPD), Asthma, Diabetes Mellitus (DM)  
48 type 1 or 2, Chronic Kidney Disease (CKD), Cardiovascular Disease (CVD) including  
49 Hypertension, Liver disease, Chronic Neurological Disease (CND), Cancer, and  
50 Immunocompromised condition (including HIV and immunosuppressive therapy).  
51  
52  
53  
54  
55

56 The primary outcome was the development of AKI at admission to ICU, while secondary  
57 outcomes included survival at 30 and 90 days after admission to hospital.  
58  
59  
60

## Statistics

Statistical analysis was performed using IBM SPSS Statistics ® (version 26) and R version 4.0.4. If not stated otherwise, continuous variables are presented as median and/or mean if data is normally distributed, and categorical variables are presented as the number (n) of patients (valid % of the study population). Shapiro-Wilk test of normality was performed for continuous variables. Patient characteristics for patients with or without AKI was compared using Student's t-test for continuous variables and Fisher exact test for categorical variables. A *p*-value <0.05 was considered statistically significant

Univariable logistic regression analysis was performed to examine the predictors for AKI at ICU-admission (as defined by rSAPSII-score  $\geq 4$ ). Independent variables included age, gender, comorbidities, smoking-status, medication with ACEi or ARB, ACF and ARF at admission to hospital. AKI at admission to hospital was not included as an independent variable in the analysis due to discrepancy in AKI-definition. Variables with a *p*-value <0.1 in the univariable regression were included in the multivariable regression, where a *p*-value <0.05 was considered as statistically significant. Multicollinearity was evaluated using the variance inflation factor (VIF).

Both univariable and multivariable logistic regression analysis as described, and univariable and multivariable Cox regression analysis, was performed to assess risk factors associated with 30- and 90-days mortality and the role of AKI at ICU-admission for predicting survival. Independent variables in univariable logistic regression analysis included comorbidities, age, gender, smoking-status, medication with ACEi or ARB, ACF and ARF at admission to hospital, and AKI at ICU-admission. Multicollinearity was evaluated using the VIF.

Kaplan-Meier survival analyses for the time to death was performed to compare the group with AKI at ICU-admission versus the group with no AKI. The comparison was done using log-rank test. Level of significance was considered *p*-value <0.05. Days from ICU-admission to death (event) or May 15<sup>th</sup>, 2021 (censoring), considered the time of analysis.

## Ethics

The study was approved by Regional Committees for Medical and Health Research Ethics West (approval number 169604). Informed consent was waived based on information to participants in NIPaR about the registry and their right to withdraw from NIPaR.

## RESULTS

A total of 394 adult patients were admitted to ICU with COVID-19 in the study period. Thirty-three of the patients were excluded due to CKD, resulting in a study population of 361 ICU-patients, 100 females and 261 males. From these, 105 (29.1%) had AKI at hospital admission. Median age was 63.6 [IQR; 53.5-72.5] years and median BMI was 27.7 [24.8-32.0] kg/m<sup>2</sup>. Current smokers constituted 2.5% of the patients. None of the female patients were pregnant. Median length of stay (LOS) at the ICU was 11.6 [5.7-19.5] days. Mechanical ventilation was initiated in 81.2% of the patients.

Comorbidity was reported in 68.1% of the study population, and 29.1% had two or more comorbidities. Regular medication of Angiotensin Converting Enzyme-inhibitor (ACEi) and/or Angiotensin II Receptor Blocker (ARB) was used by 23.4% of the study population (Table 1).



**Table 1: Patient characteristics by AKI-status at ICU admission.**

| Patient demographics       | All patients<br>(N = 361) | Missing data<br>(No of<br>patients) | AKI<br>(n = 114) | No AKI<br>(n = 242) | p-value<br>(AKI vs no AKI) |
|----------------------------|---------------------------|-------------------------------------|------------------|---------------------|----------------------------|
| Age in years, median [IQR] | 63.6 [53.5-72.5]          | -                                   | 65.6 [58.4-73.6] | 61.6 [52.0-72.3]    | <b>0.003</b>               |
| Male                       | 261 (72.3%)               | -                                   | 86 (75.4%)       | 172 (71.1%)         | 0.233                      |
| Female                     | 100 (27.7%)               | -                                   | 28 (24.6%)       | 70 (28.9%)          | 0.233                      |
| BMI, median [IQR]          | 27.7 [24.8-32.0]          | 141                                 | 27.3 [23.0-30.6] | 28.3 [25.1-32.4]    | 0.132                      |
| BMI $\geq$ 30              | 83 (37.7%)                | 141                                 | 21 (31.8%)       | 61 (40.4%)          | 0.147                      |
| Current smoker             | 9 (2.5%)                  | -                                   | 3 (2.6%)         | 6 (2.5%)            | 0.592                      |
| Comorbidity/ies            | 246 (68.1%)               | -                                   | 81 (71.1%)       | 161 (66.5%)         | 0.233                      |
| 1                          | 141 (39.1%)               | -                                   | 44 (38.6%)       | 94 (38.8%)          | 0.530                      |
| $\geq$ 2                   | 105 (29.1%)               | -                                   | 37 (32.5%)       | 67 (27.7%)          | 0.212                      |
| CVD                        | 158 (43.8%)               | -                                   | 58 (50.9%)       | 98 (40.5%)          | <b>0.042</b>               |
| DM                         | 74 (20.5%)                | -                                   | 23 (20.2%)       | 50 (20.7%)          | 0.518                      |
| Asthma                     | 55 (15.2%)                | -                                   | 15 (13.2%)       | 39 (16.1%)          | 0.288                      |
| CPD                        | 37 (10.2%)                | -                                   | 14 (12.3%)       | 23 (9.5%)           | 0.266                      |
| Immunocompromised          | 20 (5.5%)                 | -                                   | 5 (4.4%)         | 14 (5.8%)           | 0.394                      |
| Cancer                     | 17 (4.7%)                 | -                                   | 6 (5.3%)         | 11 (4.5%)           | 0.476                      |
| CND                        | 12 (3.3%)                 | -                                   | 5 (4.4%)         | 7 (2.9%)            | 0.329                      |
| Liver disease              | 3 (0.8%)                  | -                                   | 1 (0.9%)         | 2 (0.8%)            | 0.687                      |
| ACEi/ARB                   | 83 (23.4%)                | 7                                   | 34 (30.6%)       | 47 (19.7%)          | <b>0.019</b>               |

AKI = Acute Kidney Injury, ICU = Intensive Care Unit, IQR = Interquartile Range, BMI = Body Mass Index, CVD = Cardiovascular Disease, DM = Diabetes Mellitus, CPD = Chronic Pulmonary Disease, CND = Chronic Neurological Disease, ACEi = Angiotensin-Converting Enzyme-inhibitor, ARB = Angiotensin II Receptor Blocker.

Patients with AKI at admission to the ICU were older than patients with no AKI. They also had more cardiovascular disease (CVD) and more often used ACEi or ARB (Table 1).

Patients with AKI at admission to ICU were more likely to have reduced GCS (Table 2).

**Table 2: Laboratory findings and organ complications by AKI-status at ICU admission.**

| Variables at admission to hospital      | All patients<br>(N = 361) | Missing data<br>(No of patients) | AKI<br>(n= 114)   | No AKI<br>(n= 242) | p-value<br>(AKI vs No AKI) |
|-----------------------------------------|---------------------------|----------------------------------|-------------------|--------------------|----------------------------|
| SCr in $\mu\text{mol/l}$ , median [IQR] | 85.0 [70.3-104.0]         | 1                                | 98.0 [73.5-128.0] | 80.5 [69.5-96.0]   | <b>&lt;0.000</b>           |
| Estimated baseline SCr, median [IQR]    | 92.5 [76.0-95.6]          | -                                | 92.5 [85.0-94.5]  | 92.7 [75.3-96.1]   | 0.826                      |
| AKI at hospital-admission               | 105 (29.1%)               | 4                                | 62 (54.4%)        | 42 (17.4%)         | <b>&lt;0.000</b>           |
| Severe ARF                              | 319 (88,6%)               | 1                                | 103 (91,2%)       | 212 (87.2%)        | 0.213                      |
| Severe ACF                              | 124 (35,4%)               | 11                               | 49 (45,0%)        | 74 (31.4%)         | <b>0.010</b>               |
| <b>Variables at ICU</b>                 |                           |                                  |                   |                    |                            |
| GCS                                     |                           |                                  |                   |                    |                            |
| 14-15                                   | 323 (89.5%)               | -                                | 89 (78.1%)        | 229 (94.6%)        | <b>&lt;0.000</b>           |
| $\leq 13$                               | 38 (10.5%)                | -                                | 25 (21.9%)        | 13 (5.4%)          | <b>&lt;0.000</b>           |
| SAPS II score, median [IQR]             | 34.0 [26.0-42.0]          | -                                | 43.0 [37.0-50.0]  | 31.0 [24.0-36.0]   | <b>&lt;0.000</b>           |
| BUN in mmol/L                           |                           | 5                                |                   |                    |                            |
| <10                                     | 275 (77.2%)               | -                                | 33 (28.9%)        | 242 (100.0%)       | <b>&lt;0.000</b>           |
| 10-29,9                                 | 79 (21.9%)                | -                                | 79 (69.3%)        |                    |                            |
| $\geq 30$                               | 2 (0.6%)                  | -                                | 2 (1.8%)          |                    |                            |
| UO in ml per 24 hours                   |                           |                                  |                   |                    |                            |
| >1000                                   | 307 (85.0%)               | -                                | 60 (52.6%)        | 242 (100.0%)       | <b>&lt;0.000</b>           |
| 500-999                                 | 35 (9.7%)                 | -                                | 35 (30.7%)        |                    |                            |
| <500                                    | 19 (5.3%)                 | -                                | 19 (16.7%)        |                    |                            |
| <b>AKI at ICU admission</b>             | 114 (32.0%)               | 5                                |                   |                    |                            |

AKI = Acute Kidney Injury, ICU = Intensive Care Unit, SCr = Serum-Creatinine, IQR = Interquartile Range, ARF = Acute Respiratory Failure, ACF = Acute Circulatory Failure, GCS = Glasgow Coma Scale, SAPS II = Simplified Acute Physiology Score II, BUN = Blood Urea Nitrogen, UO = Urine Output.

The distribution of organ failure at admission to hospital were 88.6%, 35.4% and 29.1% for Acute Respiratory Failure (ARF), Acute Circulatory Failure (ACF), and AKI (as defined by RIFLE-criteria), respectively. ACF at hospital admission was significantly more prevalent in patients who suffered AKI at ICU admission ( $p$ -value <0.05).

A total of 114 (32.0%) patients had AKI in the ICU. From these, 79 (69.3%) and 2 (1.8%) had BUN =10-29.9 mmol/L and  $\geq 30$  mmol/L, respectively. Urine Output (UO) of 500-999 ml/24 hours and <500 ml/24 hours were presented by 30.7% and 16.7%. More than half of the patients who had AKI at ICU-admission also had AKI at admission to hospital.

Renal Replacement Therapy (RRT) was required in 8.0% (n = 29) of the total patient group during the ICU-stay (Table 3). Continuous RRT (CRRT) was initiated in 28 patients, and intermittent RRT (IRRT) was initiated in 7 patients. Median time with CRRT was 9.0 [5.0-14.0] days and 6.5 [5.0-7.5] days with IRRT.

**Table 3: Treatment and patient outcome by AKI-status at ICU admission.**

| Treatment                                                                                                                                                                                                                           | All patients<br>(N = 361) | Missing data<br>(No of<br>patients) | AKI<br>(n = 114) | No AKI<br>(n = 242) | p-value<br>(AKI vs no AKI) |
|-------------------------------------------------------------------------------------------------------------------------------------------------------------------------------------------------------------------------------------|---------------------------|-------------------------------------|------------------|---------------------|----------------------------|
| LOS in ICU, median [IQR]                                                                                                                                                                                                            | 11.6 [5.7-19.5]           | -                                   | 13.5 [5.9-25.6]  | 10.9 [5.7-19.0]     | 0.125                      |
| Mechanical ventilation <sup>a</sup>                                                                                                                                                                                                 | 293 (81.2%)               | -                                   | 99 (86.8%)       | 192 (79.3%)         | 0.057                      |
| RRT                                                                                                                                                                                                                                 | 29 (8.0%)                 | -                                   | 16 (14.0%)       | 13 (5.4%)           | <b>0.006</b>               |
| CRRT                                                                                                                                                                                                                                | 28 (7.8%)                 | -                                   | 15 (13.2%)       | 13 (5.4%)           | <b>0.012</b>               |
| Median days [IQR]                                                                                                                                                                                                                   | 9.0 [5.0-14.0]            | -                                   | 8.0 [5.0-12.0]   | 11.5 [5.5-16.3]     | 0.863                      |
| IRRT                                                                                                                                                                                                                                | 7 (1.9%)                  | -                                   | 6 (5.3%)         | 0 (0.0%)            | <b>0.001</b>               |
| Median days [IQR]                                                                                                                                                                                                                   | 6.5 [5.0-7.5]             | -                                   | 6.5 [5.0-7.5]    | -                   | -                          |
| <b>Outcome</b>                                                                                                                                                                                                                      |                           |                                     |                  |                     |                            |
| Survival first 24 hours in ICU                                                                                                                                                                                                      | 358 (99.2%)               | -                                   | 111 (97.4%)      | 242 (100.0%)        | <b>0.032</b>               |
| Survival at hospital discharge                                                                                                                                                                                                      | 295 (81.7%)               | -                                   | 80 (70.2%)       | 210 (86.8%)         | <b>&lt;0.000</b>           |
| Survival at 30 days                                                                                                                                                                                                                 | 298 (82.5%)               | -                                   | 77 (67.5%)       | 217 (89.7%)         | <b>&lt;0.000</b>           |
| Survival at 90 days                                                                                                                                                                                                                 | 280 (77.6%)               | -                                   | 70 (61.4%)       | 206 (85.1%)         | <b>&lt;0.000</b>           |
| AKI = Acute Kidney Injury, ICU = Intensive Care Unit, LOS = Length of stay, IQR = Interquartile Range, RRT = Renal Replacement Therapy, CRRT = Continuous Renal Replacement Therapy, IRRT = Intermittent Renal Replacement Therapy. |                           |                                     |                  |                     |                            |

Survival for the total study population at 30 and 90 days was 82.5% and 77.6%, respectively. Survival at 30 and 90 days in patients with AKI at ICU admission were 67.5% and 61.4%, respectively, which was significantly lower compared to 89.7% and 85.1% in patients with no AKI.

A total of 337 patients with no missing data were included in three logistic regression analyses to assess risk factors for AKI at ICU admission and risk factors associated with mortality.

In the first multivariable model only ACF was significantly associated with the development of AKI at ICU-admission (OR 1.19; 95% CI: 1.05–1.35) (Table 4). Multicollinearity was evaluated using the variance inflation factor (VIF). VIF ranged from 1.02 (ACF) to 1.51 (CVD). The area under the curve (AUC) was 0.64 (95% CI: 0.57–0.70).

**Table 4: Odds for AKI at ICU admission.**

| Univariable logistic regression |      |              |                 | Multivariable logistic regression |             |                  |
|---------------------------------|------|--------------|-----------------|-----------------------------------|-------------|------------------|
| Variable                        | OR   | 95% CI       | <i>p</i> -value | OR                                | 95% CI      | <i>p</i> -value  |
| Immunocompromised               | 0.50 | 0.11 - 1.58  | 0.281           |                                   |             |                  |
| Liver disease                   | 1.11 | 0.05 - 11.67 | 0.935           |                                   |             |                  |
| Cancer                          | 0.80 | 0.22 - 2.39  | 0.701           |                                   |             |                  |
| CND                             | 1.27 | 0.33 - 4.31  | 0.705           |                                   |             |                  |
| Current smoker                  | 1.11 | 0.23 - 4.29  | 0.886           |                                   |             |                  |
| Gender                          | 0.88 | 0.52 - 1.46  | 0.619           |                                   |             |                  |
| Age                             | 1.02 | 1.01 - 1.04  | <b>0.013</b>    | 1.02                              | 1.00 - 1.04 | 0.121            |
| CVD                             | 1.50 | 0.94 - 2.38  | <b>0.089</b>    | 1.00                              | 0.56 - 1.78 | 0.996            |
| DM                              | 0.95 | 0.52 - 1.69  | 0.867           |                                   |             |                  |
| Asthma                          | 0.79 | 0.39 - 1.49  | 0.474           |                                   |             |                  |
| CPD                             | 1.17 | 0.54 - 2.42  | 0.673           |                                   |             |                  |
| ACEi/ARB                        | 1.77 | 1.04 - 3.00  | <b>0.033</b>    | 1.52                              | 0.82 - 2.83 | 0.187            |
| ACF                             | 1.21 | 1.07 - 1.37  | <b>0.002</b>    | 1.19                              | 1.05 - 1.35 | <b>0.006</b>     |
| ARF                             | 1.08 | 0.85 - 1.42  | 0.561           |                                   |             |                  |
| (Intercept)                     |      |              |                 | 0.09                              | 0.03 - 0.31 | <b>&lt;0.000</b> |

AKI = Acute Kidney Injury, ICU = Intensive Care Unit, OR = Odds Ratio, CI = Confidence Interval, CND = Chronic Neurological Disease, CVD = Cardiovascular Disease, DM = Diabetes Mellitus, CPD = Chronic Pulmonary Disease, ACEi = Angiotensin-Converting Enzyme-inhibitor, ARB = Angiotensin II Receptor Blocker, ACF = Acute Circulatory Failure, ARF = Acute Respiratory Failure.

In the second multivariable model, risk factors associated with 30-day mortality were Cancer, Age, AKI at ICU-admission and ACF (Table 5). VIF ranged from 1.03 (ACF) to 1.47 (CVD). The AUC was 0.87 (95% CI 0.83–0.92).

**Table 5: Odds for survival at 30 days.**

| Univariable logistic regression |      |              |                  | Multivariable logistic regression |              |                  |
|---------------------------------|------|--------------|------------------|-----------------------------------|--------------|------------------|
| Variable                        | OR   | 95% CI       | p-value          | OR                                | 95% CI       | p-value          |
| Immunocompromised               | 0.29 | 0.02 - 1.47  | 0.235            |                                   |              |                  |
| Liver disease                   | 2.28 | 0.11 - 24.21 | 0.503            |                                   |              |                  |
| Cancer                          | 3.24 | 1.05 - 9.35  | <b>0.032</b>     | 4.39                              | 1.17 - 15.90 | <b>0.024</b>     |
| CND                             | 0.44 | 0.02 - 2.38  | 0.442            |                                   |              |                  |
| Current smoker                  | 1.30 | 0.19 - 5.55  | 0.746            |                                   |              |                  |
| Gender                          | 1.54 | 0.85 - 2.75  | 0.149            |                                   |              |                  |
| Age                             | 1.08 | 1.05 - 1.11  | <b>&lt;0.000</b> | 1.07                              | 1.04 - 1.11  | <b>&lt;0.000</b> |
| CVD                             | 2.33 | 1.33 - 4.15  | <b>0.004</b>     | 0.93                              | 0.40 - 2.11  | 0.857            |
| DM                              | 1.14 | 0.56 - 2.20  | 0.707            |                                   |              |                  |
| Asthma                          | 1.09 | 0.49 - 2.25  | 0.818            |                                   |              |                  |
| CPD                             | 4.17 | 1.97 - 8.73  | <b>&lt;0.000</b> | 2.50                              | 0.98 - 6.43  | 0.055            |
| ACEi/ARB                        | 2.02 | 1.09 - 3.66  | <b>0.023</b>     | 1.24                              | 0.53 - 2.89  | 0.625            |
| ACF                             | 1.78 | 1.50 - 2.14  | <b>&lt;0.000</b> | 1.70                              | 1.41 - 2.09  | <b>&lt;0.000</b> |
| ARF                             | 1.18 | 0.87 - 1.79  | 0.349            |                                   |              |                  |
| <b>AKI at ICU admission</b>     | 4.32 | 2.44 - 7.78  | <b>&lt;0.000</b> | 3.78                              | 1.90 - 7.67  | <b>&lt;0.000</b> |
| (Intercept)                     |      |              |                  | 0.00                              | 0.00 - 0.002 | <b>&lt;0.000</b> |

OR = Odds Ratio, CI = Confidence Interval, CND = Chronic Neurological Disease, CVD = Cardiovascular Disease, DM = Diabetes Mellitus, CPD = Chronic Pulmonary Disease, ACEi = Angiotensin-Converting Enzyme-inhibitor, ARB = Angiotensin II Receptor Blocker, ACF = Acute Circulatory Failure, ARF = Acute Respiratory Failure, AKI = Acute Kidney Injury, ICU = Intensive Care Unit.

In the third model, age, AKI at ICU-admission and ACF were associated with 90-day mortality (Table S1). VIF in this model ranged from 1.02 (ACF) to 1.46 (CVD). The AUC was 0.87 (95% CI 0.82–0.91).

The results of Kaplan-Meier survival analysis stratified by AKI-status at admission to ICU showed that patients with AKI had significantly lower survival than patients without AKI (log-rank  $p$ -value  $<0.001$ ) (Fig 1). The difference in survival was constrained to the first 50 days.

<Figure 1>

A Cox regression analysis was performed as an additional approach. The results for survival at 30 days were in agreement with the results from logistic regression analysis. For survival at 90 days, the results were also in agreement, while CPD and regular medication of ACEi and/or ARB were additional significant predictors of mortality (Table S2 & S3).

## DISCUSSION

We performed a nationwide study of 361 adult patients with COVID-19 admitted to ICU. Prevalence of AKI at ICU admission was 32.0%. Acute Circulatory Failure (ACF) at hospital admission predicted AKI at ICU admission. Age, Cancer, ACF, and AKI at ICU admission were risk factors for mortality at 30 days.

The COVID-19 pandemic in Norway, with its population of 5.4 million people<sup>17</sup>, has been relatively well contained. During the study period a total 50145 cases of SARS-CoV-2 were reported, of which 2185 were admitted to hospital and 394 to the ICU<sup>18</sup>. As in other countries, patients with COVID-19 in Norwegian ICU tend to be younger and more likely male compared with the general ICU-population<sup>14</sup>. Most patients in the study population were overweight, and a large proportion were obese, which is markedly different than in the general Norwegian population<sup>19</sup>. Comorbidities such as CVD, DM and Asthma, were also more prevalent in the study population than in the general Norwegian population<sup>20</sup>.

The definition of AKI at ICU admission in our study does not fully comply with the AKI staging criteria due to the lack of creatinine-based measures of kidney function in the Norwegian Intensive Care Registry<sup>21</sup>. The SAPS II criteria for reduced urine output are similar to the staging criteria from the AKI network consensus, corresponding to AKI stage 2 and 3 (Table S4). BUN may increase by factors unrelated to kidney function, for instance due to steroid use which is regularly prescribed to COVID-19 patients in the ICU<sup>22</sup>. This would lead to an overestimate of AKI at ICU admission in our study, given standard enteral nutrition practices in Norwegian ICU. Creatinine is also influenced by several factors unrelated to kidney function but was chosen over BUN as the preferred biochemical parameter in the consensus process leading up to AKI definitions due to its widespread use<sup>21, 23</sup>.

While not fully in line with current AKI definitions, the combination of urine output and BUN should provide an estimate of AKI sufficiently similar to that of creatinine and urine output to be relevant in a registry study. The significant difference in s-creatinine at admission to hospital between patients with and without AKI at ICU admission in our material supports this assumption. Prevalence of AKI at ICU admission in our study is also similar to previous findings in the general ICU population. Bagshaw et al. report that on the

1  
2  
3 day of ICU-admission, 36% of the general ICU-population suffer AKI as defined by RIFLE-  
4 criteria, 16.3% in the Risk group and 19.9% in the Injury and Failure groups combined <sup>24</sup>. A  
5 narrative review in COVID-19 found 23% prevalence of AKI in the ICU <sup>25</sup>. In our study,  
6  
7 30.2% (n = 114) of COVID-19 patients admitted to ICU had AKI (Table 2).  
8  
9

10  
11 Due to the lack of granularity in our data there are findings in our material that warrant  
12 further investigation. In our study group, 40.4% (n = 42) of the patients with AKI at  
13 admission to hospital did not present AKI at ICU admission. It is likely that different AKI  
14 criteria applied at hospital admission and ICU admission affects this difference. However, we  
15 cannot rule out, for instance, that patients with mild pre-renal AKI at admission were  
16 clinically stabilized to normal kidney function in a hospital ward prior to ICU admission due  
17 to respiratory failure. This would not contradict the impression that many COVID-19 patients  
18 in the ICU have single organ respiratory dysfunction <sup>26</sup>. On the other hand, 5.4% (n=13) of  
19 patients with no AKI at ICU admission received RRT during their ICU stay (Table 3). We  
20 would expect some patients with long ICU stays do develop AKI during their ICU stays, but  
21 we cannot rule out losing cases of AKI at ICU admission due to lack of creatinine values in  
22 the ICU. In order to establish the timeline of AKI in COVID-19 patients in ICU, studies with  
23 higher granularity data including serial urine output and creatinine measurements are needed.  
24  
25  
26  
27  
28  
29  
30  
31  
32  
33  
34  
35

36 In the regression model for AKI at ICU admission, only ACF at admission to hospital was  
37 found to be significantly associated. ACF is an uncommonly reported parameter at admission  
38 to hospital, and thus often not included in analysis for prediction of AKI. Although we  
39 biologically would expect collinearity between ACF and AKI at ICU admission, this was  
40 contradicted by low VIF in the statistical analysis. The results suggests that AKI at ICU  
41 admission is more closely associated to circulatory status than any other factors in critically  
42 ill COVID-19 patients.  
43  
44  
45  
46  
47  
48  
49

50 In the regression model on survival, the factors Age, Cancer, ACF and AKI at ICU admission  
51 were significantly associated with increased risk of death during first 30 days. Age, ACF, and  
52 AKI at ICU admission were significantly associated with increased risk of death during first  
53 90 days. AKI at ICU admission contributed considerably to the regression model. The finding  
54 puts AKI at ICU admission up as a strong and clinically important marker for survival in  
55 critically ill COVID-19 patients. While cancer also had a high contribution to the model, only  
56 17 patients with cancer are included in the study, which reduces the clinical impact of this  
57  
58  
59  
60

1  
2  
3 finding. Chronic Pulmonary Disease (CPD) also contributes to the model but is only  
4 borderline significant. However, in the supplementary Cox regression model CPD was found  
5 significantly associated with risk of death during both first 30 and 90 days. Additionally,  
6 CPD is a risk factor in a larger group of the study population, 37 in total, and as such may be  
7 a more clinically relevant risk factor than cancer. Furthermore, respiratory disease, in  
8 addition to age, CVD and diabetes, is a previously well-recognized risk factor for severe  
9 disease progression and mortality in COVID-19 <sup>27</sup>.

10  
11  
12  
13  
14  
15  
16  
17 More than one out of three patients with AKI diagnosed first 24 hours of ICU-stay were  
18 deceased after 30-90 days. The Kaplan-Meier analysis illustrates that the mortality is  
19 predominantly in the short term within 50 days, in essence predominantly during the acute  
20 phase of illness. The finding supports that AKI at ICU-admission is a clinically important  
21 marker for poor outcome in COVID-19 (Figure 1). Low VIF in both regression models  
22 means that the effects of collinearity in the models are low. This puts further emphasis on  
23 AKI at ICU admission as an important prognostic factor for mortality in COVID-19.

24  
25  
26  
27  
28  
29  
30  
31 We recognize several strengths and limitations in this study. The study is a national cohort  
32 containing complete data of all Norwegian COVID-19 patients (N = 394) admitted to ICU in  
33 the study period. Furthermore, because of the mandatory obligation by the Norwegian  
34 authorities to deliver data, the number of missing data was negligible. ICU admission criteria  
35 and treatment traditions are also similar in Norwegian ICUs which renders that data are  
36 comparable across centers. Furthermore, during the COVID-19 pandemic in Norway patients  
37 were not denied ICU care due to capacity concerns, thereby reducing selection bias due to  
38 triage decisions.

39  
40  
41  
42  
43  
44  
45  
46 While national data increases generalizability, a major limitation in this study is that the  
47 Norwegian Intensive Care and Pandemic Registry (NIPaR) does not contain creatinine-based  
48 measures for AKI. Although the combination of urine output and BUN in rSAPSII should  
49 provide an estimate of AKI sufficiently similar to that of urine output and creatinine to be  
50 relevant, these indicators mandates that the results be interpreted with caution and limit  
51 generalizability. We also lack data regarding the timeline of AKI in COVID-19, and the use  
52 of vasopressor in the ICU. While the statistical analyses are rigorous, we nevertheless  
53 recommend that the results are treated as a basis for further investigation.



## CONCLUSION

In this national cohort of COVID-19 patients admitted to ICUs in Norway 32.0% (n = 114) developed Acute Kidney Injury (AKI) during first 24 hours of ICU-admission. The majority presented clinical and/or biochemical signs of AKI at admission to hospital. The study indicates that Acute Circulatory Failure (ACF) at hospital admission was the most important risk factor for AKI at admission to ICU, and that age, cancer, ACF and AKI at ICU-admission were associated with mortality at 30 days after hospital admission.

For peer review only

## REFERENCES

1. World Health Organization. Coronavirus Disease (COVID-19) Situation Report 51 [Internet]. March 11, 2020 [cited May 22, 2021]. Available from: [https://www.who.int/docs/default-source/coronaviruse/situation-reports/20200311-sitrep-51-covid-19.pdf?sfvrsn=1ba62e57\\_10](https://www.who.int/docs/default-source/coronaviruse/situation-reports/20200311-sitrep-51-covid-19.pdf?sfvrsn=1ba62e57_10).
2. Sardu C, Gambardella J, Morelli MB, et al. Hypertension, Thrombosis, Kidney Failure, and Diabetes: Is COVID-19 an Endothelial Disease? A Comprehensive Evaluation of Clinical and Basic Evidence. *J Clin Med* 2020;9(5) doi: 10.3390/jcm9051417 [published Online First: 2020/05/11]
3. Farouk SS, Fiaccadori E, Cravedi P, et al. COVID-19 and the kidney: what we think we know so far and what we don't. *J Nephrol* 2020 doi: 10.1007/s40620-020-00789-y [published Online First: 2020/07/22]
4. Chen YT, Shao SC, Hsu CK, et al. Incidence of acute kidney injury in COVID-19 infection: a systematic review and meta-analysis. *Crit Care* 2020;24(1):346. doi: 10.1186/s13054-020-03009-y [published Online First: 2020/06/18]
5. Hirsch JS, Ng JH, Ross DW, et al. Acute kidney injury in patients hospitalized with COVID-19. *Kidney Int* 2020 doi: 10.1016/j.kint.2020.05.006 [published Online First: 2020/05/16]
6. Rubin S, Orieux A, Prevel R, et al. Characterization of acute kidney injury in critically ill patients with severe coronavirus disease 2019. *Clin Kidney J* 2020;13(3):354-61. doi: 10.1093/ckj/sfaa099 [published Online First: 2020/06/06]
7. Xu J, Yang X, Yang L, et al. Clinical course and predictors of 60-day mortality in 239 critically ill patients with COVID-19: a multicenter retrospective study from Wuhan, China. *Crit Care* 2020;24(1):394. doi: 10.1186/s13054-020-03098-9 [published Online First: 2020/07/06]
8. Yu Y, Xu D, Fu S, et al. Patients with COVID-19 in 19 ICUs in Wuhan, China: a cross-sectional study. *Crit Care* 2020;24(1):219. doi: 10.1186/s13054-020-02939-x [published Online First: 2020/05/14]
9. Luther T, Bülow-Anderberg S, Larsson A, et al. COVID-19 patients in intensive care develop predominantly oliguric acute kidney injury. *Acta Anaesthesiol Scand* 2020 doi: 10.1111/aas.13746 [published Online First: 2020/11/15]
10. Martinot M, Eyriey M, Gravier S, et al. Predictors of mortality, ICU hospitalization, and extrapulmonary complications in COVID-19 patients. *Infect Dis Now* 2021;51(6):518-25. doi: 10.1016/j.idnow.2021.07.002 [published Online First: 20210707]
11. Nadim MK, Forni LG, Mehta RL, et al. COVID-19-associated acute kidney injury: consensus report of the 25th Acute Disease Quality Initiative (ADQI) Workgroup. *Nat Rev Nephrol* 2020;16(12):747-64. doi: 10.1038/s41581-020-00356-5 [published Online First: 2020/10/15]

- 1  
2  
3 12. Nasjonalt Servicemiljø for medisinske kvalitetsregistre. Norsk Intensiv- og pandemiregister  
4 [Internet]. [cited Sept 23, 2020]. Available from:  
5  
6 <https://www.kvalitetsregistre.no/registers/norsk-intensiv-og-pandemiregister>.  
7
- 8 13. Buanes EA, Kvåle R, Barratt-Due A. Årsrapport for 2020 med plan for forbedringstiltak [Internet].  
9 Norsk intensiv- og pandemiregister. Jun 15, 2021 [cited Jun 18, 2021]. Available from:  
10 <https://helse-bergen.no/norsk-intensivregister-nir/arsrapportar>.  
11
- 12 14. Buanes EA, Kvåle R, Barratt-Due A. Årsrapport for 2019 med plan for forbedringstiltak [Internet].  
13 Norsk Intensivregister. Nov 10, 2020 [cited Dec 15, 2020]. Available from: [https://helse-](https://helse-bergen.no/norsk-intensivregister-nir/arsrapportar)  
14 [bergen.no/norsk-intensivregister-nir/arsrapportar](https://helse-bergen.no/norsk-intensivregister-nir/arsrapportar).  
15
- 16 15. Le Gall JR, Lemeshow S, Saulnier F. A new Simplified Acute Physiology Score (SAPS II) based  
17 on a European/North American multicenter study. *JAMA* 1993;270(24):2957-63. [published  
18 Online First: 1993/12/22]  
19
- 20 16. Bagshaw SM, Uchino S, Cruz D, et al. A comparison of observed versus estimated baseline  
21 creatinine for determination of RIFLE class in patients with acute kidney injury. *Nephrol Dial*  
22 *Transplant* 2009;24(9):2739-44. doi: 10.1093/ndt/gfp159 [published Online First:  
23 2009/04/06]  
24
- 25 17. Statistisk Sentralbyrå. Befolkning [Internet] 2021 [updated Aug 19, 2021; cited Oct 10, 2021].  
26 Available from <https://www.ssb.no/befolkning/folketall/statistikk/befolkning>.  
27
- 28 18. Folkehelseinstituttet. Statistikk om koronavirus og covid-19 [Internet]. [updated Jun 9, 2021; cited  
29 Jun 9, 2021]. Available from: [https://www.fhi.no/sv/smittsomme-sykdommer/corona/dags--](https://www.fhi.no/sv/smittsomme-sykdommer/corona/dags--og-ukerapporter/dags--og-ukerapporter-om-koronavirus/#table-pagination-32719729)  
30 [og-ukerapporter/dags--og-ukerapporter-om-koronavirus/#table-pagination-32719729](https://www.fhi.no/sv/smittsomme-sykdommer/corona/dags--og-ukerapporter/dags--og-ukerapporter-om-koronavirus/#table-pagination-32719729).  
31
- 32 19. Statistisk Sentralbyrå. Helseforhold, levekårsundersøkelsen [Internet]. In: 06181: Levevaner  
33 (prosent) etter statistikkvariabel, år og kjønn, 2019 [cited May 22, 2021]. Available from:  
34 <https://www.ssb.no/statbank/table/06181/tableViewLayout1/>.  
35
- 36 20. Statistisk Sentralbyrå. Helseforhold, levekårsundersøkelsen [Internet]: In: 11190: Sykelighet.  
37 Sykdom, skade eller funksjonshemming, etter type sykelighet, alder, statistikkvariabel, år og  
38 kjønn, 2019 [cited May 22, 2021]. Available from:  
39 <https://www.ssb.no/statbank/table/11190/tableViewLayout1/>.  
40
- 41 21. Mehta RL, Kellum JA, Shah SV, et al. Acute Kidney Injury Network: report of an initiative to  
42 improve outcomes in acute kidney injury. *Crit Care* 2007;11(2):R31. doi: 10.1186/cc5713  
43
- 44 22. Inker LA, Perrone RD. Assessment of kidney function. In: UpToDate, Sterns RH (Ed), UpToDate,  
45 Waltham, MA. [updated Oct 4, 2021; cited Oct 10, 2021].  
46
- 47 23. Edelstein CL. Biomarkers of acute kidney injury. *Adv Chronic Kidney Dis* 2008;15(3):222-34.  
48 doi: 10.1053/j.ackd.2008.04.003  
49
- 50 24. Bagshaw SM, George C, Dinu I, et al. A multi-centre evaluation of the RIFLE criteria for early  
51 acute kidney injury in critically ill patients. *Nephrol Dial Transplant* 2008;23(4):1203-10.  
52 doi: 10.1093/ndt/gfm744 [published Online First: 2007/10/25]  
53  
54  
55  
56  
57  
58  
59  
60

- 1  
2  
3 25. Gabarre P, Dumas G, Dupont T, et al. Acute kidney injury in critically ill patients with COVID-  
4 19. *Intensive Care Med* 2020;46(7):1339-48. doi: 10.1007/s00134-020-06153-9 [published  
5 Online First: 2020/06/14]  
6  
7  
8 26. Laake JH, Buanes EA, Småstuen MC, et al. Characteristics, management and survival of ICU  
9 patients with coronavirus disease-19 in Norway, March-June 2020. A prospective  
10 observational study. *Acta Anaesthesiol Scand* 2021;65(5):618-28. doi: 10.1111/aas.13785  
11 [published Online First: 20210227]  
12  
13  
14 27. Zheng Z, Peng F, Xu B, et al. Risk factors of critical & mortal COVID-19 cases: A systematic  
15 literature review and meta-analysis. *J Infect* 2020 doi: 10.1016/j.jinf.2020.04.021 [published  
16 Online First: 2020/04/23]  
17  
18  
19  
20  
21  
22  
23  
24  
25  
26  
27  
28  
29  
30  
31  
32  
33  
34  
35  
36  
37  
38  
39  
40  
41  
42  
43  
44  
45  
46  
47  
48  
49  
50  
51  
52  
53  
54  
55  
56  
57  
58  
59  
60

## ABREVIATIONS

ACEi = Angiotensin-Converting Enzyme-inhibitor

ACF = Acute Circulatory Failure

ADQI = Acute Dialysis Quality Initiative

AKI = Acute Kidney Injury

ARB = Angiotensin II Receptor Blocker

ARDS = Acute Respiratory Distress Syndrome

ARF = Acute Respiratory Failure

BMI = Body Mass Index

BUN = Blood Urea Nitrogen

CKD = Chronic Kidney Disease

CND = Chronic Neurological Disease

COVID-19 = Corona Virus Disease-19

CPD = Chronic Pulmonary Disease

CRRT = Continuous Renal Replacement Therapy

CVD = Cardiovascular Disease

DM = Diabetes Mellitus

GFR = Glomerular Filtration Rate

GCS = Glasgow Coma Scale

ICU = Intensive Care Unit

IRRT = Intermittent Renal Replacement Therapy

KDIGO = The Kidney Disease: Improving Global Outcomes

NIPaR = Norwegian Intensive Care and Pandemic Registry

RIFLE = Risk, Injury, Failure, Loss of kidney function and End-stage renal disease

RRT = Renal Replacement Therapy

rSAPS II = renal Simplified Acute Physiology Score II

SAPS II = Simplified Acute Physiology Score II

SARS-CoV-2 = Severe Acute Respiratory Syndrome Coronavirus 2

SCr = Serum-Creatinine

UO = Urine Output

## **FUNDING STATEMENT**

This research received no specific grant from any funding agency in the public, commercial or not-for-profit sectors.

## **COMPETING INTERESTS STATEMENT**

The authors declare no conflict of interest.

## **DATA SHARING STATEMENT**

Data cannot be shared publicly because of GDPR restrictions. Data are available from Norwegian Intensive Care and Pandemic Registry (NIPaR) upon application containing necessary approvals

## **AUTHOR CONTRIBUTIONS**

All authors contributed to the study design. EAA and EAB collected data; EAA and FZG analyzed the data; All authors contributed to interpretation of results and in writing the paper.

## **EXCLUSIVE LICENSE STATEMENT**

I, the Submitting Author has the right to grant and does grant on behalf of all authors of the Work (as defined in the below author licence), an exclusive licence and/or a non-exclusive licence for contributions from authors who are: i) UK Crown employees; ii) where BMJ has agreed a CC-BY licence shall apply, and/or iii) in accordance with the terms applicable for US Federal Government officers or employees acting as part of their official duties; on a worldwide, perpetual, irrevocable, royalty-free basis to BMJ Publishing Group Ltd (“BMJ”) its licensees and where the relevant Journal is co-owned by BMJ to the co-owners of the Journal, to publish the Work in BMJ Open and any other BMJ products and to exploit all rights, as set out in our licence.

## **PATIENT CONSENT FORM**

Not applicable.

## PATIENT AND PUBLIC INVOLVEMENT STATEMENT

Patients or the public were not involved in the design, or conduct, or reporting, or dissemination plans of our research.

## SUPPORTING INFORMATION

### 1. Figure(s)

**Figure 1: Kaplan-Meier Survival analysis stratified by AKI-status at ICU admission.**

*Legends:* Time in days from ICU admission. AKI = Acute Kidney Injury, ICU = Intensive Care Unit.

For peer review only

Figure 1: Kaplan-Meier survival analysis stratified by AKI-status at admission to ICU.

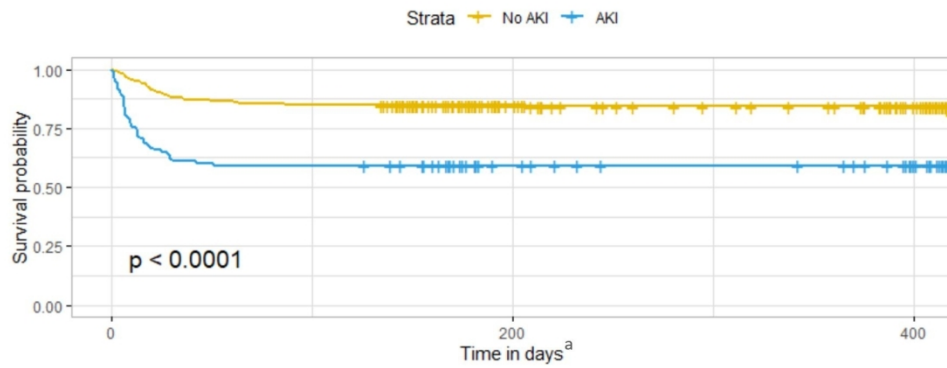

AKI = Acute Kidney Injury, ICU = Intensive Care Unit, <sup>a</sup>Time in days from ICU-admission,

Figure 1: Kaplan-Meier Survival analysis stratified by AKI-status at ICU admission.

156x82mm (300 x 300 DPI)



## SUPPLEMENTARY MATERIAL

**Table S1: Odds for survival at 90 days.** *Legends:* OR = Odds Ratio, CI = Confidence Interval, CND = Chronic Neurological Disease, CVD = Cardiovascular Disease, DM = Diabetes Mellitus, CPD = Chronic Pulmonary Disease, ACEi = Angiotensin-Converting Enzyme-inhibitor, ARB = Angiotensin II Receptor Blocker, ACF = Acute Circulatory Failure, ARF = Acute Respiratory Failure, AKI = Acute Kidney Injury, ICU = Intensive Care Unit.

| Table S1: Odds for survival at 90 days. |      |              |         |                                   |              |         |
|-----------------------------------------|------|--------------|---------|-----------------------------------|--------------|---------|
| Univariate logistic regression          |      |              |         | Multivariable logistic regression |              |         |
| Variable                                | OR   | 95% CI       | p-value | OR                                | 95% CI       | p-value |
| Immunocompromised                       | 0.21 | 0.01 - 1.07  | 0.135   |                                   |              |         |
| Liver disease                           | 1.67 | 0.08 - 17.65 | 0.678   |                                   |              |         |
| Cancer                                  | 2.32 | 0.75 - 6.64  | 0.123   |                                   |              |         |
| CND                                     | 0.32 | 0.02 - 1.73  | 0.285   |                                   |              |         |
| Current smoker                          | 0.95 | 0.14 - 4.02  | 0.947   |                                   |              |         |
| Gender                                  | 1.15 | 0.66 - 1.99  | 0.611   |                                   |              |         |
| Age                                     | 1.08 | 1.06 - 1.11  | <0.000  | 1.08                              | 1.04 - 1.11  | <0.000  |
| CVD                                     | 2.25 | 1.35 - 3.79  | 0.002   | 0.72                              | 0.33 - 1.53  | 0.396   |
| DM                                      | 0.97 | 0.50 - 1.81  | 0.928   |                                   |              |         |
| Asthma                                  | 0.76 | 0.35 - 1.54  | 0.468   |                                   |              |         |
| CPD                                     | 3.26 | 1.57 - 6.71  | 0.001   | 2.03                              | 0.79 - 5.23  | 0.139   |
| ACEi/ARB                                | 2.54 | 1.45 - 4.45  | 0.001   | 1.94                              | 0.88 - 4.32  | 0.102   |
| ACF                                     | 1.78 | 1.53 - 2.10  | <0.000  | 1.72                              | 1.46 - 2.06  | <0.000  |
| ARF                                     | 1.31 | 0.96 - 2.00  | 0.133   |                                   |              |         |
| <b>AKI at ICU-admission</b>             | 3.90 | 2.31 - 6.67  | <0.000  | 3.14                              | 1.66 - 6.00  | 0.001   |
| (Intercept)                             |      |              |         | 0.00                              | 0.00 - 0.002 | <0.000  |

OR = Odds Ratio, CI = Confidence Interval, CND = Chronic Neurological Disease, CVD = Cardiovascular Disease, DM = Diabetes Mellitus, CPD = Chronic Pulmonary Disease, ACEi = Angiotensin-Converting Enzyme-inhibitor, ARB = Angiotensin II Receptor Blocker, ACF = Acute Circulatory Failure, ARF = Acute Respiratory Failure, AKI = Acute Kidney Injury, ICU = Intensive Care Unit.

**Table S2: Hazard ratio for survival at 30 days.** *Legends:* HR = Hazard Ratio, CI = Confidence Interval, CND = Chronic Neurological Disease, CVD = Cardiovascular Disease, DM = Diabetes Mellitus, CPD = Chronic Pulmonary Disease, ACEi = Angiotensin-Converting Enzyme-inhibitor, ARB = Angiotensin II Receptor Blocker, ACF = Acute Circulatory Failure, ARF = Acute Respiratory Failure, AKI = Acute Kidney Injury, ICU = Intensive Care Unit.

| <b>Table S2: Hazard ratio for survival at 30 days.</b> |       |              |                  |                                     |             |                  |
|--------------------------------------------------------|-------|--------------|------------------|-------------------------------------|-------------|------------------|
| <b>Univariable Cox regression</b>                      |       |              |                  | <b>Multivariable Cox regression</b> |             |                  |
| Variable                                               | HR    | 95% CI       | <i>p</i> -value  | HR                                  | 95% CI      | <i>p</i> -value  |
| Immunocompromised                                      | 0.32  | 0.05 - 2.30  | 0.261            |                                     |             |                  |
| Liver disease                                          | 0.85  | 0.33 - 17.00 | 0.398            |                                     |             |                  |
| Cancer                                                 | 0.97  | 1.10 - 6.20  | <b>0.023</b>     | 2.65                                | 1.11 - 6.36 | <b>0.029</b>     |
| CND                                                    | -0.73 | 0.07 - 3.50  | 0.468            |                                     |             |                  |
| Current smoker                                         | 0.15  | 0.29 - 4.80  | 0.830            |                                     |             |                  |
| Gender                                                 | 0.41  | 0.90 - 2.60  | 0.121            |                                     |             |                  |
| Age                                                    | 0.07  | 1.00 - 1.10  | <b>&lt;0.000</b> | 1.05                                | 1.03 - 1.08 | <b>&lt;0.000</b> |
| CVD                                                    | 0.77  | 1.30 - 3.60  | <b>0.004</b>     | 0.96                                | 0.52 - 1.76 | 0.886            |
| DM                                                     | 0.12  | 0.61 - 2.10  | 0.695            |                                     |             |                  |
| Asthma                                                 | 0.08  | 0.55 - 2.10  | 0.807            |                                     |             |                  |
| CPD                                                    | 1.30  | 2.00 - 6.40  | <b>&lt;0.000</b> | 2.31                                | 1.25 - 4.25 | <b>0.008</b>     |
| ACEi/ARB                                               | 0.63  | 1.10 - 3.20  | <b>0.019</b>     | 1.37                                | 0.75 - 2.50 | 0.311            |
| ACF                                                    | 0.52  | 1.40 - 2.00  | <b>&lt;0.000</b> | 1.56                                | 1.32 - 1.85 | <b>&lt;0.000</b> |
| ARF                                                    | 0.15  | 0.83 - 1.60  | 0.379            |                                     |             |                  |
| <b>AKI at ICU admission</b>                            | 1.30  | 2.30 - 6.30  | <b>&lt;0.000</b> | 2.92                                | 1.74 - 4.90 | <b>&lt;0.000</b> |

HR = Hazard Ratio, CI = Confidence Interval, CND = Chronic Neurological Disease, CVD = Cardiovascular Disease, DM = Diabetes Mellitus, CPD = Chronic Pulmonary Disease, ACEi = Angiotensin-Converting Enzyme-inhibitor, ARB = Angiotensin II Receptor Blocker, ACF = Acute Circulatory Failure, ARF = Acute Respiratory Failure, AKI = Acute Kidney Injury, ICU = Intensive Care Unit.

**Table S3: Hazard ratio for survival at 90 days.** *Legends:* HR = Hazard Ratio, CI = Confidence Interval, CND = Chronic Neurological Disease, CVD = Cardiovascular Disease, DM = Diabetes Mellitus, CPD = Chronic Pulmonary Disease, ACEi = Angiotensin-Converting Enzyme-inhibitor, ARB = Angiotensin II Receptor Blocker, ACF = Acute Circulatory Failure, ARF = Acute Respiratory Failure, AKI = Acute Kidney Injury, ICU = Intensive Care Unit.

| <b>Table S3: Hazard ratio for survival at 90 days.</b> |             |                    |                  |                                     |                    |                  |
|--------------------------------------------------------|-------------|--------------------|------------------|-------------------------------------|--------------------|------------------|
| <b>Univariable Cox regression</b>                      |             |                    |                  | <b>Multivariable Cox regression</b> |                    |                  |
| Variable                                               | HR          | 95% CI             | <i>p</i> -value  | HR                                  | 95% CI             | <i>p</i> -value  |
| Immunocompromised                                      | 0.24        | 0.03 - 1.70        | 0.160            |                                     |                    |                  |
| Liver disease                                          | 1.80        | 0.25 - 13.00       | 0.557            |                                     |                    |                  |
| Cancer                                                 | 2.10        | 0.90 - 4.80        | <b>0.086</b>     | 2.07                                | 0.88 - 4.88        | 0.095            |
| CND                                                    | 0.37        | 0.05 - 2.60        | 0.317            |                                     |                    |                  |
| Current smoker                                         | 0.92        | 0.22 - 3.70        | 0.902            |                                     |                    |                  |
| Gender                                                 | 1.20        | 0.74 - 1.90        | 0.472            |                                     |                    |                  |
| Age                                                    | 1.10        | 1.00 - 1.10        | <b>&lt;0.000</b> | 1.05                                | 1.03 - 1.08        | <b>&lt;0.000</b> |
| CVD                                                    | 2.10        | 1.30 - 3.20        | <b>0.002</b>     | 0.85                                | 0.50 - 1.46        | 0.558            |
| DM                                                     | 0.99        | 0.56 - 1.70        | 0.964            |                                     |                    |                  |
| Asthma                                                 | 0.81        | 0.42 - 1.60        | 0.527            |                                     |                    |                  |
| CPD                                                    | 2.90        | 1.70 - 5.10        | <b>&lt;0.000</b> | 2.09                                | 1.18 - 3.70        | <b>0.012</b>     |
| ACEi/ARB                                               | 2.20        | 1.40 - 3.50        | <b>&lt;0.000</b> | 1.78                                | 1.05 - 3.01        | <b>0.032</b>     |
| ACF                                                    | 1.70        | 1.40 - 1.90        | <b>&lt;0.000</b> | 1.56                                | 1.35 - 1.80        | <b>&lt;0.000</b> |
| ARF                                                    | 1.30        | 0.91 - 1.80        | 0.159            |                                     |                    |                  |
| <b>AKI at ICU admission</b>                            | <b>3.40</b> | <b>2.20 - 5.30</b> | <b>&lt;0.000</b> | <b>2.66</b>                         | <b>1.69 - 4.19</b> | <b>&lt;0.000</b> |

HR = Hazard Ratio, CI = Confidence Interval, CND = Chronic Neurological Disease, CVD = Cardiovascular Disease, DM = Diabetes Mellitus, CPD = Chronic Pulmonary Disease, ACEi = Angiotensin-Converting Enzyme-inhibitor, ARB = Angiotensin II Receptor Blocker, ACF = Acute Circulatory Failure, ARF = Acute Respiratory Failure, AKI = Acute Kidney Injury, ICU = Intensive Care Unit.

**Table S4: Comparison of AKI definitions and staging criteria.** *Legends:* AKI = Acute Kidney Injury, KDIGO = Kidney Disease: Improving Global Outcomes, RIFLE = Risk, Injury, Failure, Loss, End-stage kidney disease, SAPS II = Simplified Acute Physiology Score II, SCr = Serum Creatinine, GFR = Glomerular Filtration Rate, UO = Urine Output, BUN = Blood Urea Nitrogen, RRT = Renal Replacement Therapy, h = hours.

| Table S4: Comparison of AKI definitions and staging criteria. |                                                                                          |                |                                                                                           |                                                                                     |               |            |                |
|---------------------------------------------------------------|------------------------------------------------------------------------------------------|----------------|-------------------------------------------------------------------------------------------|-------------------------------------------------------------------------------------|---------------|------------|----------------|
| KDIGO                                                         |                                                                                          | RIFLE          |                                                                                           |                                                                                     | Renal SAPS II |            |                |
| Stage                                                         | SCr <sup>a</sup>                                                                         | Class          | SCr or GFR                                                                                | UO <sup>b</sup>                                                                     | Score         | UO/24 h    | BUN            |
|                                                               |                                                                                          |                |                                                                                           |                                                                                     | <b>0</b>      | >1000 ml   | <10 mmol/L     |
| <b>1</b>                                                      | 1.5-1.9x baseline<br>or<br>>26.5 µmol/L increase                                         | <b>Risk</b>    | SCr increase 1.5x baseline<br>or<br>eGFR decrease ≥25%                                    | <0.5ml/kg/h for 6 h                                                                 |               |            |                |
| <b>2</b>                                                      | 2.0-2.9x baseline                                                                        | <b>Injury</b>  | SCr increase 2.0x baseline<br>or<br>eGFR decrease ≥50%                                    | <0.5 ml/kg/h for 12 h<br>(<840 ml/24 h <sup>c</sup> )                               | <b>4</b>      | 500-999 ml |                |
|                                                               |                                                                                          |                |                                                                                           |                                                                                     | <b>6</b>      |            | 10-29.9 mmol/L |
| <b>3</b>                                                      | ≥3.0x baseline<br>or<br>≥4 mg/dl (= 353.7 µmol/L)<br>increase<br>or<br>initiation of RRT | <b>Failure</b> | SCr increase ≥3.0x baseline<br>or<br>≥4 mg/dl (= 353.7 µmol/L)<br>or<br>GFR decrease ≥75% | <0.3 ml/kg/h for 24 h<br>(<504 ml/24 h <sup>c</sup> )<br>or<br>anuria for 12 hours. | <b>10</b>     |            | >30 mmol/L     |
|                                                               |                                                                                          |                |                                                                                           |                                                                                     | <b>11</b>     | <500 ml    |                |

<sup>a</sup>SCr-increase within 48 hours.  
<sup>b</sup>UO criteria are shared by KDIGO and RIFLE.  
<sup>c</sup>Standardized for a patient with a weight of 70 kg.

AKI = Acute Kidney Injury, KDIGO: Kidney Disease: Improving Global Outcomes, RIFLE: Risk, Injury, Failure, Loss, End-stage kidney disease, SAPS II = Simplified Acute Physiology Score II, SCr = Serum Creatinine, GFR = Glomerular Filtration Rate, UO = Urine Output, BUN = Blood Urea Nitrogen, RRT = Renal Replacement Therapy, h = hours.

**STROBE Statement**—Checklist of items that should be included in reports of *cohort studies*

For article:

“Acute Kidney Injury in COVID-19 patients in the Intensive Care Unit. Evaluation of risk factors and mortality in a national cohort.”

|                              | Item No | Recommendation                                                                                                                                                                                                                                                                                                         | Page No |
|------------------------------|---------|------------------------------------------------------------------------------------------------------------------------------------------------------------------------------------------------------------------------------------------------------------------------------------------------------------------------|---------|
| <b>Title and abstract</b>    | 1       | (a) Indicate the study’s design with a commonly used term in the title or the abstract<br>(b) Provide in the abstract an informative and balanced summary of what was done and what was found                                                                                                                          | 1-2     |
| <b>Introduction</b>          |         |                                                                                                                                                                                                                                                                                                                        |         |
| Background/rationale         | 2       | Explain the scientific background and rationale for the investigation being reported                                                                                                                                                                                                                                   | 4       |
| Objectives                   | 3       | State specific objectives, including any prespecified hypotheses                                                                                                                                                                                                                                                       | 4       |
| <b>Methods</b>               |         |                                                                                                                                                                                                                                                                                                                        |         |
| Study design                 | 4       | Present key elements of study design early in the paper                                                                                                                                                                                                                                                                | (4-)5   |
| Setting                      | 5       | Describe the setting, locations, and relevant dates, including periods of recruitment, exposure, follow-up, and data collection                                                                                                                                                                                        | 5       |
| Participants                 | 6       | (a) Give the eligibility criteria, and the sources and methods of selection of participants. Describe methods of follow-up<br>(b) For matched studies, give matching criteria and number of exposed and unexposed                                                                                                      | 5       |
| Variables                    | 7       | Clearly define all outcomes, exposures, predictors, potential confounders, and effect modifiers. Give diagnostic criteria, if applicable                                                                                                                                                                               | 5-6     |
| Data sources/<br>measurement | 8*      | For each variable of interest, give sources of data and details of methods of assessment (measurement). Describe comparability of assessment methods if there is more than one group                                                                                                                                   | 6-7     |
| Bias                         | 9       | Describe any efforts to address potential sources of bias                                                                                                                                                                                                                                                              | 5-7     |
| Study size                   | 10      | Explain how the study size was arrived at                                                                                                                                                                                                                                                                              | 5       |
| Quantitative variables       | 11      | Explain how quantitative variables were handled in the analyses. If applicable, describe which groupings were chosen and why                                                                                                                                                                                           | 6-7     |
| Statistical methods          | 12      | (a) Describe all statistical methods, including those used to control for confounding<br>(b) Describe any methods used to examine subgroups and interactions<br>(c) Explain how missing data were addressed<br>(d) If applicable, explain how loss to follow-up was addressed<br>(e) Describe any sensitivity analyses | 6-7     |
| <b>Results</b>               |         |                                                                                                                                                                                                                                                                                                                        |         |
| Participants                 | 13*     | (a) Report numbers of individuals at each stage of study—eg numbers potentially eligible, examined for eligibility, confirmed eligible, included in the study, completing follow-up, and analysed<br>(b) Give reasons for non-participation at each stage<br>(c) Consider use of a flow diagram                        | 8       |
| Descriptive data             | 14*     | (a) Give characteristics of study participants (eg demographic, clinical, social) and information on exposures and potential confounders                                                                                                                                                                               | 8-11    |

|                          |     |                                                                                                                                                                                                                                                                                                                                                                                                               |       |
|--------------------------|-----|---------------------------------------------------------------------------------------------------------------------------------------------------------------------------------------------------------------------------------------------------------------------------------------------------------------------------------------------------------------------------------------------------------------|-------|
|                          |     | (b) Indicate number of participants with missing data for each variable of interest                                                                                                                                                                                                                                                                                                                           |       |
|                          |     | (c) Summarise follow-up time (eg, average and total amount)                                                                                                                                                                                                                                                                                                                                                   |       |
| Outcome data             | 15* | Report numbers of outcome events or summary measures over time                                                                                                                                                                                                                                                                                                                                                | 10-13 |
| Main results             | 16  | (a) Give unadjusted estimates and, if applicable, confounder-adjusted estimates and their precision (eg, 95% confidence interval). Make clear which confounders were adjusted for and why they were included<br>(b) Report category boundaries when continuous variables were categorized<br>(c) If relevant, consider translating estimates of relative risk into absolute risk for a meaningful time period | 11-13 |
| Other analyses           | 17  | Report other analyses done—eg analyses of subgroups and interactions, and sensitivity analyses                                                                                                                                                                                                                                                                                                                | 13    |
| <b>Discussion</b>        |     |                                                                                                                                                                                                                                                                                                                                                                                                               |       |
| Key results              | 18  | Summarise key results with reference to study objectives                                                                                                                                                                                                                                                                                                                                                      | 14    |
| Limitations              | 19  | Discuss limitations of the study, taking into account sources of potential bias or imprecision. Discuss both direction and magnitude of any potential bias                                                                                                                                                                                                                                                    | 14-16 |
| Interpretation           | 20  | Give a cautious overall interpretation of results considering objectives, limitations, multiplicity of analyses, results from similar studies, and other relevant evidence                                                                                                                                                                                                                                    | 14-16 |
| Generalisability         | 21  | Discuss the generalisability (external validity) of the study results                                                                                                                                                                                                                                                                                                                                         | 16    |
| <b>Other information</b> |     |                                                                                                                                                                                                                                                                                                                                                                                                               |       |
| Funding                  | 22  | Give the source of funding and the role of the funders for the present study and, if applicable, for the original study on which the present article is based                                                                                                                                                                                                                                                 | 22    |

\*Give information separately for exposed and unexposed groups.

**Note:** An Explanation and Elaboration article discusses each checklist item and gives methodological background and published examples of transparent reporting. The STROBE checklist is best used in conjunction with this article (freely available on the Web sites of PLoS Medicine at <http://www.plosmedicine.org/>, Annals of Internal Medicine at <http://www.annals.org/>, and Epidemiology at <http://www.epidem.com/>). Information on the STROBE Initiative is available at <http://www.strobe-statement.org>.

# BMJ Open

## Acute Kidney Injury in COVID-19 patients in the Intensive Care Unit. Evaluation of risk factors and mortality in a national cohort.

|                                 |                                                                                                                                                                                                                                                                                                                                                                                                                                                                                                                                                                                                                                                                                                                 |
|---------------------------------|-----------------------------------------------------------------------------------------------------------------------------------------------------------------------------------------------------------------------------------------------------------------------------------------------------------------------------------------------------------------------------------------------------------------------------------------------------------------------------------------------------------------------------------------------------------------------------------------------------------------------------------------------------------------------------------------------------------------|
| Journal:                        | <i>BMJ Open</i>                                                                                                                                                                                                                                                                                                                                                                                                                                                                                                                                                                                                                                                                                                 |
| Manuscript ID                   | bmjopen-2021-059046.R2                                                                                                                                                                                                                                                                                                                                                                                                                                                                                                                                                                                                                                                                                          |
| Article Type:                   | Original research                                                                                                                                                                                                                                                                                                                                                                                                                                                                                                                                                                                                                                                                                               |
| Date Submitted by the Author:   | 04-May-2022                                                                                                                                                                                                                                                                                                                                                                                                                                                                                                                                                                                                                                                                                                     |
| Complete List of Authors:       | Aukland, Eirik; Norwegian University of Science and Technology, Faculty of Medicine and Health Sciences<br>Klepstad, Pål; Norwegian University of Science and Technology, Department of Circulation and Medical Imaging; St Olavs Hospital Trondheim University Hospital, Department of Anesthesia and Intensive Care Medicine<br>Aukland, Stein Magnus; Haukeland University Hospital, Department of Radiology; University of Bergen, Department of Clinical Medicine<br>Ghavidel, Fatemeh; Haukeland University Hospital, Department of Research and Development<br>Buanes, Eirik; Norwegian Intensive Care and Pandemic Registry; Haukeland University Hospital, Department of Anesthesia and Intensive Care |
| <b>Primary Subject Heading</b>: | Intensive care                                                                                                                                                                                                                                                                                                                                                                                                                                                                                                                                                                                                                                                                                                  |
| Secondary Subject Heading:      | Intensive care                                                                                                                                                                                                                                                                                                                                                                                                                                                                                                                                                                                                                                                                                                  |
| Keywords:                       | COVID-19, Acute renal failure < NEPHROLOGY, Adult intensive & critical care < INTENSIVE & CRITICAL CARE                                                                                                                                                                                                                                                                                                                                                                                                                                                                                                                                                                                                         |
|                                 |                                                                                                                                                                                                                                                                                                                                                                                                                                                                                                                                                                                                                                                                                                                 |

SCHOLARONE™  
Manuscripts



I, the Submitting Author has the right to grant and does grant on behalf of all authors of the Work (as defined in the below author licence), an exclusive licence and/or a non-exclusive licence for contributions from authors who are: i) UK Crown employees; ii) where BMJ has agreed a CC-BY licence shall apply, and/or iii) in accordance with the terms applicable for US Federal Government officers or employees acting as part of their official duties; on a worldwide, perpetual, irrevocable, royalty-free basis to BMJ Publishing Group Ltd ("BMJ") its licensees and where the relevant Journal is co-owned by BMJ to the co-owners of the Journal, to publish the Work in this journal and any other BMJ products and to exploit all rights, as set out in our [licence](#).

The Submitting Author accepts and understands that any supply made under these terms is made by BMJ to the Submitting Author unless you are acting as an employee on behalf of your employer or a postgraduate student of an affiliated institution which is paying any applicable article publishing charge ("APC") for Open Access articles. Where the Submitting Author wishes to make the Work available on an Open Access basis (and intends to pay the relevant APC), the terms of reuse of such Open Access shall be governed by a Creative Commons licence – details of these licences and which [Creative Commons](#) licence will apply to this Work are set out in our licence referred to above.

Other than as permitted in any relevant BMJ Author's Self Archiving Policies, I confirm this Work has not been accepted for publication elsewhere, is not being considered for publication elsewhere and does not duplicate material already published. I confirm all authors consent to publication of this Work and authorise the granting of this licence.



1  
2  
3 Long title:  
4

5 Acute Kidney Injury in COVID-19 patients in the Intensive Care  
6 Unit. Evaluation of risk factors and mortality in a national cohort.  
7  
8

9  
10  
11 Short title: Acute Kidney Injury in ICU-treated COVID-19 patients.  
12

13  
14 Eirik Aasen Aukland<sup>1\*</sup>, Pål Klepstad<sup>2</sup>, Stein Magnus Aukland<sup>3</sup>, Fatemeh Zamanzad  
15 Ghavidel<sup>4</sup>, Eirik Alnes Buanes<sup>5</sup>  
16  
17

18  
19  
20 <sup>1</sup>*Faculty of Medicine and Health Sciences, Norwegian University of Science and Technology*  
21 *(NTNU), Trondheim, Norway.*

22  
23 <sup>2</sup>*Department of Circulation and Medical Imaging, NTNU; Department of Anesthesia and*  
24 *Intensive Care Medicine, St Olav University Hospital, Trondheim, Norway.*

25  
26 <sup>3</sup>*Department of Radiology, Haukeland University Hospital; Department of Clinical*  
27 *Medicine, University of Bergen, Bergen, Norway.*

28  
29 <sup>4</sup>*Department of Research and Development, Haukeland University Hospital, Bergen,*  
30 *Norway.*

31  
32 <sup>5</sup>*Norwegian Intensive Care and Pandemic Registry; Department of Anesthesia and Intensive*  
33 *Care, Haukeland University Hospital, Bergen, Norway.*  
34  
35  
36  
37  
38

39 **\* Corresponding author**

40 e-mail address (primary): eirik\_aukland@hotmail.com

41 e-mail address (secondary): eirikaau@stud.ntnu.no  
42  
43  
44  
45

46 **Keywords:** COVID-19, acute renal failure, adult intensive & critical care  
47  
48

49 **Word count** (excludes the title page, abstract, tables, acknowledgements, contributions and  
50 references): 3390  
51  
52  
53

54 **Number of tables:** 5

55 **Number of figures:** 1

56 **Number of supplementary tables:** 4  
57  
58  
59  
60

## ABSTRACT

**Objectives:** Acute kidney injury (AKI) is a frequent complication among critical ill patients with COVID-19, but the actual incidence is unknown as AKI-incidence varies from 25 to 89% in intensive care unit (ICU) populations. We aimed to describe the prevalence and risk factors of AKI in COVID-19 patients admitted to ICU in Norway.

**Design:** Nation-wide observational study with data sampled from the Norwegian Intensive Care and Pandemic Registry (NIPaR) for the period between March 10<sup>th</sup> until December 31<sup>st</sup>, 2020.

**Setting:** ICU patients with COVID-19 in Norway. NIPaR collects data on intensive care stays covering more than 90% of Norwegian ICU and 98% of ICU stays.

**Participants:** Adult COVID-19 patients admitted to Norwegian ICU were included in the study. Patients with Chronic Kidney Disease (CKD) were excluded in order to avoid bias from CKD on the incidence of AKI.

**Primary and secondary outcome measures:** Primary outcome was AKI at ICU admission as defined by renal SAPS-II score in NIPaR. Secondary outcome measures included survival at 30 and 90 days after admission to hospital.

**Results:** A total number of 361 COVID-19 patients were included in the analysis. AKI was present in 32.0% of the patients at ICU admission. The risk for AKI at ICU admission was related to acute circulatory failure at admission to hospital. Survival for the study population at 30 and 90 days was 82.5% and 77.6%, respectively. Cancer was a predictor of 30-day mortality. Age, acute circulatory failure at hospital admission and AKI at ICU admission were predictors of both 30- and 90-day mortality.

**Conclusions:** A high number of COVID-19 patients had AKI at ICU admission. The study indicates that AKI at ICU admission was related to acute circulatory failure at hospital admission. Age, acute circulatory failure at hospital admission and AKI at ICU admission were associated with mortality.

## ARTICLE SUMMARY

### Strength and limitations of this study

- The study is a national cohort of Norwegian COVID-19 patients admitted to ICUs in the study period.
- The study has few missing data, and the inclusion rate is high.
- The health system functioned within capacity during the study period, which renders that results are less likely to be biased due to capacity strains.
- AKI in the ICU was defined according to renal SAPS II score and does not fully comply with the RIFLE or KDIGO criteria due to the lack of creatinine-based measures of kidney function in the registry.
- While the study provides complete data on AKI at ICU-admission, it does not present the ICU trajectory of AKI in COVID-19 patients.

## INTRODUCTION

COVID-19, an infectious disease caused by the novel coronavirus Severe Acute Respiratory Syndrome Coronavirus 2 (SARS-CoV-2), has quickly developed into a pandemic since the early outbreak in Wuhan, China, in December 2019 <sup>1</sup>.

Several studies report Acute Kidney Injury (AKI) among hospitalized COVID-19 patients while less data is obtained exclusively in Intensive Care Unit (ICU) patients <sup>2-10</sup>. To our knowledge, previous studies are not based upon all ICU admissions within a large population. Furthermore, there is a call from the consensus report on COVID-19 associated AKI published by the 25<sup>th</sup> Acute Dialysis Quality Initiative (ADQI) Workgroup that studies should “incorporate the information about the proportion of different comorbidities in patients with and without AKI, including potential risk factors for the development of AKI” <sup>11</sup>.

National registries in Norway provide opportunities to perform nationwide registry studies in order to answer calls such as the one from the ADQI workgroup. The strength of such registry-based studies is that they are based on larger patient cohorts which make results more robust and generalizable. The drawback is that registry data set seldom are a direct fit for the research in question, making adaptations and extrapolations necessary.

This study is based on data available from the Norwegian Intensive Care and Pandemic Registry (NIPaR). NIPaR is a government funded national health registry constituted of two parts; the Norwegian Intensive Care Registry established in 1998, and the Norwegian Pandemic Registry established in March 2020 <sup>12</sup>. Registration is mandatory, and data is entered by hospital staff. For patients with COVID-19 in the ICU we report the prevalence of AKI, factors associated with AKI and the association between AKI and mortality.

## METHODS

The Norwegian Intensive Care and Pandemic Registry (NIPaR) contains two patient populations. NIPaR collects data on intensive care stays in pre-defined ICU, covering more than 90% of Norwegian ICU and 98% of ICU stays<sup>13</sup>. Qualification criteria for ICU and intensive care patients are defined by NIPaR<sup>14</sup>. The Norwegian Pandemic Registry includes patients admitted to hospital in Norway with a positive PCR test for SARS-CoV-2 during the previous 3 months, and includes 99% of pandemic patients admitted to hospital<sup>13</sup>. Both registry parts employ automatic and manual validation to ensure data quality.

The study group included COVID-19 patients above the age of 18 years admitted to ICU in the period between March 10<sup>th</sup>, 2020 (the initial outbreak of SARS-CoV-2 in Norway), until December 31<sup>st</sup>, 2020. Patients with Chronic Kidney Disease (CKD), defined as previously diagnosed kidney disease upon hospital admission, were excluded in order to avoid bias from CKD on the effects of AKI.

Data collection at hospital admission included age, gender, height, weight, comorbidities, pregnancy, regular medication of Angiotensin-Converting Enzyme-inhibitor (ACEi) or Angiotensin II Receptor Blocker (ARB), smoking, S-Creatinine (SCr), organ complications at hospital admission (Acute Kidney Injury [AKI], Acute Respiratory Failure [ARF], Acute Circulatory Failure [ACF] recorded at the discretion of the attending physician).

Data collection from the ICU stay included primary reason for referral to ICU, clinical scoring systems in the ICU (Glasgow Coma Scale [GCS], SAPSII-score), length of stay (LOS), mechanical ventilation, Renal Replacement Therapy (RRT) (Intermittent [IRRT] and Continuous [CRRT]), and survival (ICU first 24 hours, in-hospital at ICU and at 30 and 90 days after admission to hospital).

### Definitions

Due to lack of variables, it was not possible to employ creatinine values to define AKI in the ICU. The only available marker for renal function in the Norwegian Intensive Care Registry is contained within the Simplified Acute Physiology Score (SAPS II)<sup>15</sup>. As a result, renal Simplified Acute Physiology Score II (rSAPSII) is the sole marker for AKI during ICU stay in this study. AKI in the ICU was defined as rSAPSII score of  $\geq 4$  (Urine Output/24 h <1000

1  
2  
3 ml and/or Blood Urea Nitrogen >10 mmol/L). SAPS II is based on observations within the  
4 first 24 hours in the ICU.  
5  
6  
7

8 While AKI at ICU-admission was defined according to rSAPSII score, AKI at admission to  
9 hospital was defined according to RIFLE-criteria. A serum creatinine increase of >1.5x  
10 baseline was available as a separate variable (RIFLE Risk-category). For missing data, AKI  
11 at hospital admission was based on serum creatinine at hospital admission and the MDRD  
12 equation for estimating baseline creatinine. An estimated Glomerular Filtration Rate (GFR)  
13 of 75 ml/min/1.73m<sup>2</sup> was used to calculate baseline creatinine<sup>16</sup>. Data on ethnicity was not  
14 available for input in the equation.  
15  
16  
17  
18  
19  
20  
21

22 Acute Circulatory Failure (ACF) at admission to hospital was defined as acute deterioration  
23 in the patient circulation as compared to normal state, resulting in circulatory symptoms in  
24 high, moderate or light exertion or in rest. This includes cardiac arrhythmia, symptoms of heart  
25 failure and/or cardiac ischemia, regardless of vasopressor or inotrope treatment. Severe ACF  
26 was defined as circulatory symptoms in rest.  
27  
28  
29  
30  
31

32 Acute Respiratory Failure (ARF) at admission to hospital was defined as acute deterioration  
33 of respiratory function at admission to hospital as compared to normal state, resulting in  
34 respiratory symptoms in high, moderate or light exertion or in rest. This includes all  
35 conditions which can cause acute deterioration of respiratory function, including bacterial,  
36 viral, or cryptogenic pneumoniae, acute respiratory distress syndrome (ARDS),  
37 pneumothorax, pleural fluid, and bronchiolitis. Severe ARF was defined as respiratory  
38 symptoms in rest.  
39  
40  
41  
42  
43  
44  
45

46 Comorbidities are defined as pre-existing diagnoses upon admission to hospital.

47 Comorbidities included Chronic Pulmonary Disease (CPD), Asthma, Diabetes Mellitus (DM)  
48 type 1 or 2, Chronic Kidney Disease (CKD), Cardiovascular Disease (CVD) including  
49 Hypertension, Liver disease, Chronic Neurological Disease (CND), Cancer, and  
50 Immunocompromised condition (including HIV and immunosuppressive therapy).  
51  
52  
53  
54  
55

56 The primary outcome was the development of AKI at admission to ICU, while secondary  
57 outcomes included survival at 30 and 90 days after admission to hospital.  
58  
59  
60

## Statistics

Statistical analysis was performed using IBM SPSS Statistics® (version 26) and R version 4.0.4. If not stated otherwise, continuous variables are presented as median and/or mean if data is normally distributed, and categorical variables are presented as the number (n) of patients (valid % of the study population). Shapiro-Wilk test of normality was performed for continuous variables. Patient characteristics for patients with or without AKI was compared using Student's t-test for continuous variables and Fisher exact test for categorical variables. A *p*-value <0.05 was considered statistically significant

Univariable logistic regression analysis was performed to examine the predictors for AKI at ICU-admission (as defined by rSAPSII-score  $\geq 4$ ). Independent variables included age, gender, comorbidities, smoking-status, medication with ACEi or ARB, ACF and ARF at admission to hospital. AKI at admission to hospital was not included as an independent variable in the analysis due to discrepancy in AKI-definition. Variables with a *p*-value <0.1 in the univariable regression were included in the multivariable regression, where a *p*-value <0.05 was considered as statistically significant. Multicollinearity was evaluated using the variance inflation factor (VIF).

Univariable and multivariable logistic regression analysis as described, was performed to assess risk factors associated with 30- and 90-days mortality and the role of AKI at ICU-admission for predicting survival. Independent variables in univariable logistic regression analysis included comorbidities, age, gender, smoking-status, medication with ACEi or ARB, ACF and ARF at admission to hospital, and AKI at ICU-admission. Multicollinearity was evaluated using the VIF.

Univariable and multivariable Cox regression analysis was performed in a similar fashion, as an additional approach to assess 30- and 90-days mortality. The data was censored at 30 and 90 days.

Kaplan-Meier survival analyses for the time to death was performed to compare the group with AKI at ICU-admission versus the group with no AKI. The comparison was done using log-rank test. Level of significance was considered *p*-value <0.05. Days from ICU-admission to death (event) or May 15<sup>th</sup>, 2021 (censoring), considered the time of analysis.

## Ethics

The study was approved by Regional Committees for Medical and Health Research Ethics West (approval number 169604). Informed consent was waived based on information to participants in NIPaR about the registry and their right to withdraw from NIPaR.

## RESULTS

A total of 394 adult patients were admitted to ICU with COVID-19 in the study period. Thirty-three of the patients were excluded due to CKD, resulting in a study population of 361 ICU-patients, 100 females and 261 males. From these, 105 (29.1%) had AKI at hospital admission. Median age was 63.6 [IQR; 53.5-72.5] years and median BMI was 27.7 [24.8-32.0] kg/m<sup>2</sup>. Current smokers constituted 2.5% of the patients. None of the female patients were pregnant. Median length of stay (LOS) at the ICU was 11.6 [5.7-19.5] days. Mechanical ventilation was initiated in 81.2% of the patients.

Comorbidity was reported in 68.1% of the study population, and 29.1% had two or more comorbidities. Regular medication of Angiotensin Converting Enzyme-inhibitor (ACEi) and/or Angiotensin II Receptor Blocker (ARB) was used by 23.4% of the study population (Table 1).



**Table 1: Patient characteristics by AKI-status at ICU admission.**

| Patient demographics       | All patients<br>(N = 361) | Missing data<br>(No of<br>patients) | AKI<br>(n = 114) | No AKI<br>(n = 242) | p-value<br>(AKI vs no AKI) |
|----------------------------|---------------------------|-------------------------------------|------------------|---------------------|----------------------------|
| Age in years, median [IQR] | 63.6 [53.5-72.5]          | -                                   | 65.6 [58.4-73.6] | 61.6 [52.0-72.3]    | <b>0.003</b>               |
| Male                       | 261 (72.3%)               | -                                   | 86 (75.4%)       | 172 (71.1%)         | 0.233                      |
| Female                     | 100 (27.7%)               | -                                   | 28 (24.6%)       | 70 (28.9%)          | 0.233                      |
| BMI, median [IQR]          | 27.7 [24.8-32.0]          | 141                                 | 27.3 [23.0-30.6] | 28.3 [25.1-32.4]    | 0.132                      |
| BMI $\geq$ 30              | 83 (37.7%)                | 141                                 | 21 (31.8%)       | 61 (40.4%)          | 0.147                      |
| Current smoker             | 9 (2.5%)                  | -                                   | 3 (2.6%)         | 6 (2.5%)            | 0.592                      |
| Comorbidity/ies            | 246 (68.1%)               | -                                   | 81 (71.1%)       | 161 (66.5%)         | 0.233                      |
| 1                          | 141 (39.1%)               | -                                   | 44 (38.6%)       | 94 (38.8%)          | 0.530                      |
| $\geq$ 2                   | 105 (29.1%)               | -                                   | 37 (32.5%)       | 67 (27.7%)          | 0.212                      |
| CVD                        | 158 (43.8%)               | -                                   | 58 (50.9%)       | 98 (40.5%)          | <b>0.042</b>               |
| DM                         | 74 (20.5%)                | -                                   | 23 (20.2%)       | 50 (20.7%)          | 0.518                      |
| Asthma                     | 55 (15.2%)                | -                                   | 15 (13.2%)       | 39 (16.1%)          | 0.288                      |
| CPD                        | 37 (10.2%)                | -                                   | 14 (12.3%)       | 23 (9.5%)           | 0.266                      |
| Immunocompromised          | 20 (5.5%)                 | -                                   | 5 (4.4%)         | 14 (5.8%)           | 0.394                      |
| Cancer                     | 17 (4.7%)                 | -                                   | 6 (5.3%)         | 11 (4.5%)           | 0.476                      |
| CND                        | 12 (3.3%)                 | -                                   | 5 (4.4%)         | 7 (2.9%)            | 0.329                      |
| Liver disease              | 3 (0.8%)                  | -                                   | 1 (0.9%)         | 2 (0.8%)            | 0.687                      |
| ACEi/ARB                   | 83 (23.4%)                | 7                                   | 34 (30.6%)       | 47 (19.7%)          | <b>0.019</b>               |

AKI = Acute Kidney Injury, ICU = Intensive Care Unit, IQR = Interquartile Range, BMI = Body Mass Index, CVD = Cardiovascular Disease, DM = Diabetes Mellitus, CPD = Chronic Pulmonary Disease, CND = Chronic Neurological Disease, ACEi = Angiotensin-Converting Enzyme-inhibitor, ARB = Angiotensin II Receptor Blocker.

Patients with AKI at admission to the ICU were older than patients with no AKI. They also had more cardiovascular disease (CVD) and more often used ACEi or ARB (Table 1).

Patients with AKI at admission to ICU were more likely to have reduced GCS (Table 2).

**Table 2: Laboratory findings and organ complications by AKI-status at ICU admission.**

| Variables at admission to hospital      | All patients<br>(N = 361) | Missing data<br>(No of patients) | AKI<br>(n= 114)   | No AKI<br>(n= 242) | p-value<br>(AKI vs No AKI) |
|-----------------------------------------|---------------------------|----------------------------------|-------------------|--------------------|----------------------------|
| SCr in $\mu\text{mol/l}$ , median [IQR] | 85.0 [70.3-104.0]         | 1                                | 98.0 [73.5-128.0] | 80.5 [69.5-96.0]   | <0.000                     |
| Estimated baseline SCr, median [IQR]    | 92.5 [76.0-95.6]          | -                                | 92.5 [85.0-94.5]  | 92.7 [75.3-96.1]   | 0.826                      |
| AKI at hospital-admission               | 105 (29.1%)               | 4                                | 62 (54.4%)        | 42 (17.4%)         | <0.000                     |
| Severe ARF                              | 319 (88.6%)               | 1                                | 103 (91.2%)       | 212 (87.2%)        | 0.213                      |
| Severe ACF                              | 124 (35.4%)               | 11                               | 49 (45.0%)        | 74 (31.4%)         | 0.010                      |
| <b>Variables at ICU</b>                 |                           |                                  |                   |                    |                            |
| GCS                                     |                           |                                  |                   |                    |                            |
| 14-15                                   | 323 (89.5%)               | -                                | 89 (78.1%)        | 229 (94.6%)        | <0.000                     |
| $\leq 13$                               | 38 (10.5%)                | -                                | 25 (21.9%)        | 13 (5.4%)          | <0.000                     |
| SAPS II score, median [IQR]             | 34.0 [26.0-42.0]          | -                                | 43.0 [37.0-50.0]  | 31.0 [24.0-36.0]   | <0.000                     |
| BUN in mmol/L                           |                           | 5                                |                   |                    |                            |
| <10                                     | 275 (77.2%)               | -                                | 33 (28.9%)        | 242 (100.0%)       | <0.000                     |
| 10-29.9                                 | 79 (21.9%)                | -                                | 79 (69.3%)        |                    |                            |
| $\geq 30$                               | 2 (0.6%)                  | -                                | 2 (1.8%)          |                    |                            |
| UO in ml per 24 hours                   |                           |                                  |                   |                    |                            |
| >1000                                   | 307 (85.0%)               | -                                | 60 (52.6%)        | 242 (100.0%)       | <0.000                     |
| 500-999                                 | 35 (9.7%)                 | -                                | 35 (30.7%)        |                    |                            |
| <500                                    | 19 (5.3%)                 | -                                | 19 (16.7%)        |                    |                            |
| <b>AKI at ICU admission</b>             | 114 (32.0%)               | 5                                |                   |                    |                            |

AKI = Acute Kidney Injury, ICU = Intensive Care Unit, SCr = Serum-Creatinine, IQR = Interquartile Range, ARF = Acute Respiratory Failure, ACF = Acute Circulatory Failure, GCS = Glasgow Coma Scale, SAPS II = Simplified Acute Physiology Score II, BUN = Blood Urea Nitrogen, UO = Urine Output.

The distribution of organ failure at admission to hospital were 88.6%, 35.4% and 29.1% for Acute Respiratory Failure (ARF), Acute Circulatory Failure (ACF), and AKI (as defined by RIFLE-criteria), respectively. ACF at hospital admission was significantly more prevalent in patients who suffered AKI at ICU admission ( $p$ -value <0.05).

A total of 114 (32.0%) patients had AKI in the ICU. From these, 79 (69.3%) and 2 (1.8%) had BUN =10-29.9 mmol/L and  $\geq 30$  mmol/L, respectively. Urine Output (UO) of 500-999 ml/24 hours and <500 ml/24 hours were presented by 30.7% and 16.7%. More than half of the patients who had AKI at ICU-admission also had AKI at admission to hospital.

Renal Replacement Therapy (RRT) was required in 8.0% (n = 29) of the total patient group during the ICU-stay (Table 3). Continuous RRT (CRRT) was initiated in 28 patients, and intermittent RRT (IRRT) was initiated in 7 patients. Median time with CRRT was 9.0 [5.0-14.0] days and 6.5 [5.0-7.5] days with IRRT.

**Table 3: Treatment and patient outcome by AKI-status at ICU admission.**

| Treatment                                                                                                                                                                                                                           | All patients<br>(N = 361) | Missing data<br>(No of<br>patients) | AKI<br>(n = 114) | No AKI<br>(n = 242) | p-value<br>(AKI vs no AKI) |
|-------------------------------------------------------------------------------------------------------------------------------------------------------------------------------------------------------------------------------------|---------------------------|-------------------------------------|------------------|---------------------|----------------------------|
| LOS in ICU, median [IQR]                                                                                                                                                                                                            | 11.6 [5.7-19.5]           | -                                   | 13.5 [5.9-25.6]  | 10.9 [5.7-19.0]     | 0.125                      |
| Mechanical ventilation <sup>a</sup>                                                                                                                                                                                                 | 293 (81.2%)               | -                                   | 99 (86.8%)       | 192 (79.3%)         | 0.057                      |
| RRT                                                                                                                                                                                                                                 | 29 (8.0%)                 | -                                   | 16 (14.0%)       | 13 (5.4%)           | <b>0.006</b>               |
| CRRT                                                                                                                                                                                                                                | 28 (7.8%)                 | -                                   | 15 (13.2%)       | 13 (5.4%)           | <b>0.012</b>               |
| Median days [IQR]                                                                                                                                                                                                                   | 9.0 [5.0-14.0]            | -                                   | 8.0 [5.0-12.0]   | 11.5 [5.5-16.3]     | 0.863                      |
| IRRT                                                                                                                                                                                                                                | 7 (1.9%)                  | -                                   | 6 (5.3%)         | 0 (0.0%)            | <b>0.001</b>               |
| Median days [IQR]                                                                                                                                                                                                                   | 6.5 [5.0-7.5]             | -                                   | 6.5 [5.0-7.5]    | -                   | -                          |
| <b>Outcome</b>                                                                                                                                                                                                                      |                           |                                     |                  |                     |                            |
| Survival first 24 hours in ICU                                                                                                                                                                                                      | 358 (99.2%)               | -                                   | 111 (97.4%)      | 242 (100.0%)        | <b>0.032</b>               |
| Survival at hospital discharge                                                                                                                                                                                                      | 295 (81.7%)               | -                                   | 80 (70.2%)       | 210 (86.8%)         | <b>&lt;0.000</b>           |
| Survival at 30 days                                                                                                                                                                                                                 | 298 (82.5%)               | -                                   | 77 (67.5%)       | 217 (89.7%)         | <b>&lt;0.000</b>           |
| Survival at 90 days                                                                                                                                                                                                                 | 280 (77.6%)               | -                                   | 70 (61.4%)       | 206 (85.1%)         | <b>&lt;0.000</b>           |
| AKI = Acute Kidney Injury, ICU = Intensive Care Unit, LOS = Length of stay, IQR = Interquartile Range, RRT = Renal Replacement Therapy, CRRT = Continuous Renal Replacement Therapy, IRRT = Intermittent Renal Replacement Therapy. |                           |                                     |                  |                     |                            |

Survival for the total study population at 30 and 90 days was 82.5% and 77.6%, respectively. Survival at 30 and 90 days in patients with AKI at ICU admission were 67.5% and 61.4%, respectively, which was significantly lower compared to 89.7% and 85.1% in patients with no AKI.

A total of 337 patients with no missing data were included in three logistic regression analyses to assess risk factors for AKI at ICU admission and risk factors associated with mortality.

In the first multivariable model only ACF was significantly associated with the development of AKI at ICU-admission (OR 1.19; 95% CI: 1.05–1.35) (Table 4). Multicollinearity was evaluated using the variance inflation factor (VIF). VIF ranged from 1.02 (ACF) to 1.51 (CVD). The area under the curve (AUC) was 0.64 (95% CI: 0.57–0.70).

**Table 4: Odds for AKI at ICU admission.**

| Univariable logistic regression |      |              |                 | Multivariable logistic regression |             |                  |
|---------------------------------|------|--------------|-----------------|-----------------------------------|-------------|------------------|
| Variable                        | OR   | 95% CI       | <i>p</i> -value | OR                                | 95% CI      | <i>p</i> -value  |
| Immunocompromised               | 0.50 | 0.11 - 1.58  | 0.281           |                                   |             |                  |
| Liver disease                   | 1.11 | 0.05 - 11.67 | 0.935           |                                   |             |                  |
| Cancer                          | 0.80 | 0.22 - 2.39  | 0.701           |                                   |             |                  |
| CND                             | 1.27 | 0.33 - 4.31  | 0.705           |                                   |             |                  |
| Current smoker                  | 1.11 | 0.23 - 4.29  | 0.886           |                                   |             |                  |
| Gender                          | 0.88 | 0.52 - 1.46  | 0.619           |                                   |             |                  |
| Age                             | 1.02 | 1.01 - 1.04  | <b>0.013</b>    | 1.02                              | 1.00 - 1.04 | 0.121            |
| CVD                             | 1.50 | 0.94 - 2.38  | <b>0.089</b>    | 1.00                              | 0.56 - 1.78 | 0.996            |
| DM                              | 0.95 | 0.52 - 1.69  | 0.867           |                                   |             |                  |
| Asthma                          | 0.79 | 0.39 - 1.49  | 0.474           |                                   |             |                  |
| CPD                             | 1.17 | 0.54 - 2.42  | 0.673           |                                   |             |                  |
| ACEi/ARB                        | 1.77 | 1.04 - 3.00  | <b>0.033</b>    | 1.52                              | 0.82 - 2.83 | 0.187            |
| ACF                             | 1.21 | 1.07 - 1.37  | <b>0.002</b>    | 1.19                              | 1.05 - 1.35 | <b>0.006</b>     |
| ARF                             | 1.08 | 0.85 - 1.42  | 0.561           |                                   |             |                  |
| (Intercept)                     |      |              |                 | 0.09                              | 0.03 - 0.31 | <b>&lt;0.000</b> |

AKI = Acute Kidney Injury, ICU = Intensive Care Unit, OR = Odds Ratio, CI = Confidence Interval, CND = Chronic Neurological Disease, CVD = Cardiovascular Disease, DM = Diabetes Mellitus, CPD = Chronic Pulmonary Disease, ACEi = Angiotensin-Converting Enzyme-inhibitor, ARB = Angiotensin II Receptor Blocker, ACF = Acute Circulatory Failure, ARF = Acute Respiratory Failure.

In the second multivariable model, risk factors associated with 30-day mortality were Cancer, Age, AKI at ICU-admission and ACF (Table 5). VIF ranged from 1.03 (ACF) to 1.47 (CVD). The AUC was 0.87 (95% CI 0.83–0.92).

**Table 5: Odds for survival at 30 days.**

| Univariable logistic regression |      |              |                  | Multivariable logistic regression |              |                  |
|---------------------------------|------|--------------|------------------|-----------------------------------|--------------|------------------|
| Variable                        | OR   | 95% CI       | p-value          | OR                                | 95% CI       | p-value          |
| Immunocompromised               | 0.29 | 0.02 - 1.47  | 0.235            |                                   |              |                  |
| Liver disease                   | 2.28 | 0.11 - 24.21 | 0.503            |                                   |              |                  |
| Cancer                          | 3.24 | 1.05 - 9.35  | <b>0.032</b>     | 4.39                              | 1.17 - 15.90 | <b>0.024</b>     |
| CND                             | 0.44 | 0.02 - 2.38  | 0.442            |                                   |              |                  |
| Current smoker                  | 1.30 | 0.19 - 5.55  | 0.746            |                                   |              |                  |
| Gender                          | 1.54 | 0.85 - 2.75  | 0.149            |                                   |              |                  |
| Age                             | 1.08 | 1.05 - 1.11  | <b>&lt;0.000</b> | 1.07                              | 1.04 - 1.11  | <b>&lt;0.000</b> |
| CVD                             | 2.33 | 1.33 - 4.15  | <b>0.004</b>     | 0.93                              | 0.40 - 2.11  | 0.857            |
| DM                              | 1.14 | 0.56 - 2.20  | 0.707            |                                   |              |                  |
| Asthma                          | 1.09 | 0.49 - 2.25  | 0.818            |                                   |              |                  |
| CPD                             | 4.17 | 1.97 - 8.73  | <b>&lt;0.000</b> | 2.50                              | 0.98 - 6.43  | 0.055            |
| ACEi/ARB                        | 2.02 | 1.09 - 3.66  | <b>0.023</b>     | 1.24                              | 0.53 - 2.89  | 0.625            |
| ACF                             | 1.78 | 1.50 - 2.14  | <b>&lt;0.000</b> | 1.70                              | 1.41 - 2.09  | <b>&lt;0.000</b> |
| ARF                             | 1.18 | 0.87 - 1.79  | 0.349            |                                   |              |                  |
| <b>AKI at ICU admission</b>     | 4.32 | 2.44 - 7.78  | <b>&lt;0.000</b> | 3.78                              | 1.90 - 7.67  | <b>&lt;0.000</b> |
| (Intercept)                     |      |              |                  | 0.00                              | 0.00 - 0.002 | <b>&lt;0.000</b> |

OR = Odds Ratio, CI = Confidence Interval, CND = Chronic Neurological Disease, CVD = Cardiovascular Disease, DM = Diabetes Mellitus, CPD = Chronic Pulmonary Disease, ACEi = Angiotensin-Converting Enzyme-inhibitor, ARB = Angiotensin II Receptor Blocker, ACF = Acute Circulatory Failure, ARF = Acute Respiratory Failure, AKI = Acute Kidney Injury, ICU = Intensive Care Unit.

In the third model, age, AKI at ICU-admission and ACF were associated with 90-day mortality (Table S1). VIF in this model ranged from 1.02 (ACF) to 1.46 (CVD). The AUC was 0.87 (95% CI 0.82–0.91).

The results of Kaplan-Meier survival analysis stratified by AKI-status at admission to ICU showed that patients with AKI had significantly lower survival than patients without AKI (log-rank  $p$ -value  $<0.001$ ) (Fig 1). The difference in survival was constrained to the first 50 days.

<Figure 1>

The results from Cox regression analysis for survival at 30 days were in agreement with the results from logistic regression analysis. For survival at 90 days, the results were also in agreement, while CPD and regular medication of ACEi and/or ARB were additional significant predictors of mortality (Table S2 & S3).

## DISCUSSION

We performed a nationwide study of 361 adult patients with COVID-19 admitted to ICU. Prevalence of AKI at ICU admission was 32.0%. Acute Circulatory Failure (ACF) at hospital admission predicted AKI at ICU admission. Age, Cancer, ACF, and AKI at ICU admission were risk factors for mortality at 30 days.

The COVID-19 pandemic in Norway, with its population of 5.4 million people<sup>17</sup>, has been relatively well contained. During the study period a total 50145 cases of SARS-CoV-2 were reported, of which 2185 were admitted to hospital and 394 to the ICU<sup>18</sup>. As in other countries, patients with COVID-19 in Norwegian ICU tend to be younger and more likely male compared with the general ICU-population<sup>14</sup>. Most patients in the study population were overweight, and a large proportion were obese, which is markedly different than in the general Norwegian population<sup>19</sup>. Comorbidities such as CVD, DM and Asthma, were also more prevalent in the study population than in the general Norwegian population<sup>20</sup>.

The definition of AKI at ICU admission in our study does not fully comply with the AKI staging criteria due to the lack of creatinine-based measures of kidney function in the Norwegian Intensive Care Registry<sup>21</sup>. The SAPS II criteria for reduced urine output are similar to the staging criteria from the AKI network consensus, corresponding to AKI stage 2 and 3 (Table S4). BUN may increase by factors unrelated to kidney function, for instance due to steroid use which is regularly prescribed to COVID-19 patients in the ICU<sup>22</sup>. This would lead to an overestimate of AKI at ICU admission in our study, given standard enteral nutrition practices in Norwegian ICU. Creatinine is also influenced by several factors unrelated to kidney function but was chosen over BUN as the preferred biochemical parameter in the consensus process leading up to AKI definitions due to its widespread use<sup>21, 23</sup>.

While not fully in line with current AKI definitions, the combination of urine output and BUN should provide an estimate of AKI sufficiently similar to that of creatinine and urine output to be relevant in a registry study. The significant difference in s-creatinine at admission to hospital between patients with and without AKI at ICU admission in our material supports this assumption. Prevalence of AKI at ICU admission in our study is also similar to previous findings in the general ICU population. Bagshaw et al. report that on the

1  
2  
3 day of ICU-admission, 36% of the general ICU-population suffer AKI as defined by RIFLE-  
4 criteria, 16.3% in the Risk group and 19.9% in the Injury and Failure groups combined <sup>24</sup>. A  
5 narrative review in COVID-19 found 23% prevalence of AKI in the ICU <sup>25</sup>. In our study,  
6  
7 30.2% (n = 114) of COVID-19 patients admitted to ICU had AKI (Table 2).  
8  
9

10  
11 Due to the lack of granularity in our data there are findings in our material that warrant  
12 further investigation. In our study group, 40.4% (n = 42) of the patients with AKI at  
13 admission to hospital did not present AKI at ICU admission. It is likely that different AKI  
14 criteria applied at hospital admission and ICU admission affects this difference. However, we  
15 cannot rule out, for instance, that patients with mild pre-renal AKI at admission were  
16 clinically stabilized to normal kidney function in a hospital ward prior to ICU admission due  
17 to respiratory failure. This would not contradict the impression that many COVID-19 patients  
18 in the ICU have single organ respiratory dysfunction <sup>26</sup>. On the other hand, 5.4% (n=13) of  
19 patients with no AKI at ICU admission received RRT during their ICU stay (Table 3). We  
20 would expect some patients with long ICU stays do develop AKI during their ICU stays, but  
21 we cannot rule out losing cases of AKI at ICU admission due to lack of creatinine values in  
22 the ICU. In order to establish the timeline of AKI in COVID-19 patients in ICU, studies with  
23 higher granularity data including serial urine output and creatinine measurements are needed.  
24  
25  
26  
27  
28  
29  
30  
31  
32  
33  
34  
35

36 In the regression model for AKI at ICU admission, only ACF at admission to hospital was  
37 found to be significantly associated. ACF is an uncommonly reported parameter at admission  
38 to hospital, and thus often not included in analysis for prediction of AKI. Although we  
39 biologically would expect collinearity between ACF and AKI at ICU admission, this was  
40 contradicted by low VIF in the statistical analysis. The results suggests that AKI at ICU  
41 admission is more closely associated to circulatory status than any other factors in critically  
42 ill COVID-19 patients.  
43  
44  
45  
46  
47  
48  
49

50 In the regression model on survival, the factors Age, Cancer, ACF and AKI at ICU admission  
51 were significantly associated with increased risk of death during first 30 days. Age, ACF, and  
52 AKI at ICU admission were significantly associated with increased risk of death during first  
53 90 days. AKI at ICU admission contributed considerably to the regression model. The finding  
54 puts AKI at ICU admission up as a strong and clinically important marker for survival in  
55 critically ill COVID-19 patients. While cancer also had a high contribution to the model, only  
56 17 patients with cancer are included in the study, which reduces the clinical impact of this  
57  
58  
59  
60

1  
2  
3 finding. Chronic Pulmonary Disease (CPD) also contributes to the model but is only  
4 borderline significant. However, in the supplementary Cox regression model CPD was found  
5 significantly associated with risk of death during both first 30 and 90 days. Additionally,  
6 CPD is a risk factor in a larger group of the study population, 37 in total, and as such may be  
7 a more clinically relevant risk factor than cancer. Furthermore, respiratory disease, in  
8 addition to age, CVD and diabetes, is a previously well-recognized risk factor for severe  
9 disease progression and mortality in COVID-19<sup>27</sup>.  
10  
11  
12  
13  
14  
15  
16

17 More than one out of three patients with AKI diagnosed first 24 hours of ICU-stay were  
18 deceased after 30-90 days. The Kaplan-Meier analysis illustrates that the mortality is  
19 predominantly in the short term within 50 days, in essence predominantly during the acute  
20 phase of illness. The finding supports that AKI at ICU-admission is a clinically important  
21 marker for poor outcome in COVID-19 (Figure 1). Low VIF in both regression models  
22 means that the effects of collinearity in the models are low. This puts further emphasis on  
23 AKI at ICU admission as an important prognostic factor for mortality in COVID-19.  
24  
25  
26  
27  
28  
29  
30

31 We recognize several strengths and limitations in this study. The study is a national cohort  
32 containing complete data of all Norwegian COVID-19 patients (N = 394) admitted to ICU in  
33 the study period. Furthermore, because of the mandatory obligation by the Norwegian  
34 authorities to deliver data, the number of missing data was negligible. ICU admission criteria  
35 and treatment traditions are also similar in Norwegian ICUs which renders that data are  
36 comparable across centers. Furthermore, during the COVID-19 pandemic in Norway patients  
37 were not denied ICU care due to capacity concerns, thereby reducing selection bias due to  
38 triage decisions.  
39  
40  
41  
42  
43  
44  
45

46 While national data increases generalizability, a major limitation in this study is that the  
47 Norwegian Intensive Care and Pandemic Registry (NIPaR) does not contain creatinine-based  
48 measures for AKI. Although the combination of urine output and BUN in rSAPSII should  
49 provide an estimate of AKI sufficiently similar to that of urine output and creatinine to be  
50 relevant, these indicators mandates that the results be interpreted with caution and limit  
51 generalizability. We also lack data regarding the timeline of AKI in COVID-19, and the use  
52 of vasopressor in the ICU. While the statistical analyses are rigorous, we nevertheless  
53 recommend that the results are treated as a basis for further investigation.  
54  
55  
56  
57  
58  
59  
60



## CONCLUSION

In this national cohort of COVID-19 patients admitted to ICUs in Norway 32.0% (n = 114) developed Acute Kidney Injury (AKI) during first 24 hours of ICU-admission. The majority presented clinical and/or biochemical signs of AKI at admission to hospital. The study indicates that Acute Circulatory Failure (ACF) at hospital admission was the most important risk factor for AKI at admission to ICU, and that age, cancer, ACF and AKI at ICU-admission were associated with mortality at 30 days after hospital admission.

For peer review only

## REFERENCES

1. World Health Organization. Coronavirus Disease (COVID-19) Situation Report 51 [Internet]. March 11, 2020 [cited May 22, 2021]. Available from: [https://www.who.int/docs/default-source/coronaviruse/situation-reports/20200311-sitrep-51-covid-19.pdf?sfvrsn=1ba62e57\\_10](https://www.who.int/docs/default-source/coronaviruse/situation-reports/20200311-sitrep-51-covid-19.pdf?sfvrsn=1ba62e57_10).
2. Sardu C, Gambardella J, Morelli MB, et al. Hypertension, Thrombosis, Kidney Failure, and Diabetes: Is COVID-19 an Endothelial Disease? A Comprehensive Evaluation of Clinical and Basic Evidence. *J Clin Med* 2020;9(5) doi: 10.3390/jcm9051417 [published Online First: 2020/05/11]
3. Farouk SS, Fiaccadori E, Cravedi P, et al. COVID-19 and the kidney: what we think we know so far and what we don't. *J Nephrol* 2020 doi: 10.1007/s40620-020-00789-y [published Online First: 2020/07/22]
4. Chen YT, Shao SC, Hsu CK, et al. Incidence of acute kidney injury in COVID-19 infection: a systematic review and meta-analysis. *Crit Care* 2020;24(1):346. doi: 10.1186/s13054-020-03009-y [published Online First: 2020/06/18]
5. Hirsch JS, Ng JH, Ross DW, et al. Acute kidney injury in patients hospitalized with COVID-19. *Kidney Int* 2020 doi: 10.1016/j.kint.2020.05.006 [published Online First: 2020/05/16]
6. Rubin S, Orioux A, Prevel R, et al. Characterization of acute kidney injury in critically ill patients with severe coronavirus disease 2019. *Clin Kidney J* 2020;13(3):354-61. doi: 10.1093/ckj/sfaa099 [published Online First: 2020/06/06]
7. Xu J, Yang X, Yang L, et al. Clinical course and predictors of 60-day mortality in 239 critically ill patients with COVID-19: a multicenter retrospective study from Wuhan, China. *Crit Care* 2020;24(1):394. doi: 10.1186/s13054-020-03098-9 [published Online First: 2020/07/06]
8. Yu Y, Xu D, Fu S, et al. Patients with COVID-19 in 19 ICUs in Wuhan, China: a cross-sectional study. *Crit Care* 2020;24(1):219. doi: 10.1186/s13054-020-02939-x [published Online First: 2020/05/14]
9. Luther T, Bülow-Anderberg S, Larsson A, et al. COVID-19 patients in intensive care develop predominantly oliguric acute kidney injury. *Acta Anaesthesiol Scand* 2020 doi: 10.1111/aas.13746 [published Online First: 2020/11/15]
10. Martinot M, Eyriey M, Gravier S, et al. Predictors of mortality, ICU hospitalization, and extrapulmonary complications in COVID-19 patients. *Infect Dis Now* 2021;51(6):518-25. doi: 10.1016/j.idnow.2021.07.002 [published Online First: 20210707]
11. Nadim MK, Forni LG, Mehta RL, et al. COVID-19-associated acute kidney injury: consensus report of the 25th Acute Disease Quality Initiative (ADQI) Workgroup. *Nat Rev Nephrol* 2020;16(12):747-64. doi: 10.1038/s41581-020-00356-5 [published Online First: 2020/10/15]

12. Nasjonalt Servicemiljø for medisinske kvalitetsregistre. Norsk Intensiv- og pandemiregister [Internet]. [cited Sept 23, 2020]. Available from: <https://www.kvalitetsregistre.no/registers/norsk-intensiv-og-pandemiregister>.
13. Buanes EA, Kvåle R, Barratt-Due A. Årsrapport for 2020 med plan for forbedringstiltak [Internet]. Norsk intensiv- og pandemiregister. Jun 15, 2021 [cited Jun 18, 2021]. Available from: <https://helse-bergen.no/norsk-intensivregister-nir/arsrapportar>.
14. Buanes EA, Kvåle R, Barratt-Due A. Årsrapport for 2019 med plan for forbedringstiltak [Internet]. Norsk Intensivregister. Nov 10, 2020 [cited Dec 15, 2020]. Available from: <https://helse-bergen.no/norsk-intensivregister-nir/arsrapportar>.
15. Le Gall JR, Lemeshow S, Saulnier F. A new Simplified Acute Physiology Score (SAPS II) based on a European/North American multicenter study. *JAMA* 1993;270(24):2957-63. [published Online First: 1993/12/22]
16. Bagshaw SM, Uchino S, Cruz D, et al. A comparison of observed versus estimated baseline creatinine for determination of RIFLE class in patients with acute kidney injury. *Nephrol Dial Transplant* 2009;24(9):2739-44. doi: 10.1093/ndt/gfp159 [published Online First: 2009/04/06]
17. Statistisk Sentralbyrå. Befolkning [Internet] 2021 [updated Aug 19, 2021; cited Oct 10, 2021]. Available from <https://www.ssb.no/befolkning/folketall/statistikk/befolkning>.
18. Folkehelseinstituttet. Statistikk om koronavirus og covid-19 [Internet]. [updated Jun 9, 2021; cited Jun 9, 2021]. Available from: <https://www.fhi.no/sv/smittsomme-sykdommer/corona/dags--og-ukerapporter/dags--og-ukerapporter-om-koronavirus/#table-pagination-32719729>.
19. Statistisk Sentralbyrå. Helseforhold, levekårsundersøkelsen [Internet]. In: 06181: Levevaner (prosent) etter statistikkvariabel, år og kjønn, 2019 [cited May 22, 2021]. Available from: <https://www.ssb.no/statbank/table/06181/tableViewLayout1/>.
20. Statistisk Sentralbyrå. Helseforhold, levekårsundersøkelsen [Internet]: In: 11190: Sykelighet. Sykdom, skade eller funksjonshemming, etter type sykelighet, alder, statistikkvariabel, år og kjønn, 2019 [cited May 22, 2021]. Available from: <https://www.ssb.no/statbank/table/11190/tableViewLayout1/>.
21. Mehta RL, Kellum JA, Shah SV, et al. Acute Kidney Injury Network: report of an initiative to improve outcomes in acute kidney injury. *Crit Care* 2007;11(2):R31. doi: 10.1186/cc5713
22. Inker LA, Perrone RD. Assessment of kidney function. In: UpToDate, Sterns RH (Ed), UpToDate, Waltham, MA. [updated Oct 4, 2021; cited Oct 10, 2021].
23. Edelstein CL. Biomarkers of acute kidney injury. *Adv Chronic Kidney Dis* 2008;15(3):222-34. doi: 10.1053/j.ackd.2008.04.003
24. Bagshaw SM, George C, Dinu I, et al. A multi-centre evaluation of the RIFLE criteria for early acute kidney injury in critically ill patients. *Nephrol Dial Transplant* 2008;23(4):1203-10. doi: 10.1093/ndt/gfm744 [published Online First: 2007/10/25]

- 1  
2  
3 25. Gabarre P, Dumas G, Dupont T, et al. Acute kidney injury in critically ill patients with COVID-  
4 19. *Intensive Care Med* 2020;46(7):1339-48. doi: 10.1007/s00134-020-06153-9 [published  
5 Online First: 2020/06/14]  
6  
7  
8 26. Laake JH, Buanes EA, Småstuen MC, et al. Characteristics, management and survival of ICU  
9 patients with coronavirus disease-19 in Norway, March-June 2020. A prospective  
10 observational study. *Acta Anaesthesiol Scand* 2021;65(5):618-28. doi: 10.1111/aas.13785  
11 [published Online First: 20210227]  
12  
13  
14 27. Zheng Z, Peng F, Xu B, et al. Risk factors of critical & mortal COVID-19 cases: A systematic  
15 literature review and meta-analysis. *J Infect* 2020 doi: 10.1016/j.jinf.2020.04.021 [published  
16 Online First: 2020/04/23]  
17  
18  
19  
20  
21  
22  
23  
24  
25  
26  
27  
28  
29  
30  
31  
32  
33  
34  
35  
36  
37  
38  
39  
40  
41  
42  
43  
44  
45  
46  
47  
48  
49  
50  
51  
52  
53  
54  
55  
56  
57  
58  
59  
60

## ABREVIATIONS

ACEi = Angiotensin-Converting Enzyme-inhibitor

ACF = Acute Circulatory Failure

ADQI = Acute Dialysis Quality Initiative

AKI = Acute Kidney Injury

ARB = Angiotensin II Receptor Blocker

ARDS = Acute Respiratory Distress Syndrome

ARF = Acute Respiratory Failure

BMI = Body Mass Index

BUN = Blood Urea Nitrogen

CKD = Chronic Kidney Disease

CND = Chronic Neurological Disease

COVID-19 = Corona Virus Disease-19

CPD = Chronic Pulmonary Disease

CRRT = Continuous Renal Replacement Therapy

CVD = Cardiovascular Disease

DM = Diabetes Mellitus

GFR = Glomerular Filtration Rate

GCS = Glasgow Coma Scale

ICU = Intensive Care Unit

IRRT = Intermittent Renal Replacement Therapy

KDIGO = The Kidney Disease: Improving Global Outcomes

NIPaR = Norwegian Intensive Care and Pandemic Registry

RIFLE = Risk, Injury, Failure, Loss of kidney function and End-stage renal disease

RRT = Renal Replacement Therapy

rSAPS II = renal Simplified Acute Physiology Score II

SAPS II = Simplified Acute Physiology Score II

SARS-CoV-2 = Severe Acute Respiratory Syndrome Coronavirus 2

SCr = Serum-Creatinine

UO = Urine Output

## FUNDING STATEMENT

This research received no specific grant from any funding agency in the public, commercial or not-for-profit sectors.

## COMPETING INTERESTS STATEMENT

The authors declare no conflict of interest.

## DATA SHARING STATEMENT

Data cannot be shared publicly because of GDPR restrictions. Data are available from Norwegian Intensive Care and Pandemic Registry (NIPaR) upon application containing necessary approvals

## AUTHOR CONTRIBUTIONS

Eirik Aasen Aukland (submitting author) conceptualized and designed the study, performed data cleaning and assisted with the data analyses, drafted the initial manuscript, and reviewed and revised the manuscript.

Pål Klepstad and Stein Magnus Aukland conceptualized and designed the study, contributed to the interpretation of the results, and critically reviewed the manuscript.

Fatemeh Zamanzad Ghavidel conducted the data analyses and critically reviewed the manuscript.

Eirik Alnes Buanes conceptualized and designed the study, collected the data, contributed to the interpretation of the results, and critically reviewed the paper.

All authors approved the final version of the manuscript.

## EXCLUSIVE LICENSE STATEMENT

I, the Submitting Author has the right to grant and does grant on behalf of all authors of the Work (as defined in the below author licence), an exclusive licence and/or a non-exclusive licence for contributions from authors who are: i) UK Crown employees; ii) where BMJ has agreed a CC-BY licence shall apply, and/or iii) in accordance with the terms applicable for US Federal Government officers or employees acting as part of their official duties; on a worldwide, perpetual, irrevocable, royalty-free basis to BMJ Publishing Group Ltd (“BMJ”) its licensees and where the relevant Journal is co-owned by BMJ to the co-owners of the

1  
2  
3 Journal, to publish the Work in BMJ Open and any other BMJ products and to exploit all  
4 rights, as set out in our licence.  
5  
6  
7

## 8 **PATIENT CONSENT FORM**

9

10 Not applicable.  
11  
12

## 13 **PATIENT AND PUBLIC INVOLVEMENT STATEMENT**

14

15 Patients or the public were not involved in the design, or conduct, or reporting, or  
16 dissemination plans of our research.  
17  
18

## 19 **SUPPORTING INFORMATION**

20

### 21 **1. Figure(s)**

22

23 **Figure 1: Kaplan-Meier Survival analysis stratified by AKI-status at ICU admission.**

24  
25  
26 *Legends:* Time in days from ICU admission. AKI = Acute Kidney Injury, ICU = Intensive  
27 Care Unit.  
28  
29  
30  
31  
32  
33  
34  
35  
36  
37  
38  
39  
40  
41  
42  
43  
44  
45  
46  
47  
48  
49  
50  
51  
52  
53  
54  
55  
56  
57  
58  
59  
60

1  
2  
3  
4  
5  
6  
7  
8  
9  
10  
11  
12  
13  
14  
15  
16  
17  
18  
19  
20  
21  
22  
23  
24  
25  
26  
27  
28  
29  
30  
31  
32  
33  
34  
35  
36  
37  
38  
39  
40  
41  
42  
43  
44  
45  
46  
47  
48  
49  
50  
51  
52  
53  
54  
55  
56  
57  
58  
59  
60

**Figure 1: Kaplan-Meier survival analysis stratified by AKI-status at admission to ICU.**

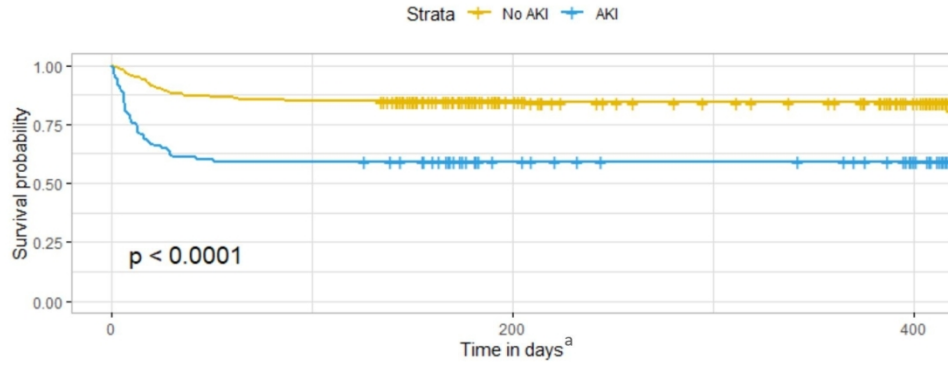

AKI = Acute Kidney Injury, ICU = Intensive Care Unit, <sup>a</sup>Time in days from ICU-admission,

Figure 1: Kaplan-Meier Survival analysis stratified by AKI-status at ICU admission.

156x82mm (300 x 300 DPI)



## SUPPLEMENTARY MATERIAL

**Table S1: Odds for survival at 90 days.** *Legends:* OR = Odds Ratio, CI = Confidence Interval, CND = Chronic Neurological Disease, CVD = Cardiovascular Disease, DM = Diabetes Mellitus, CPD = Chronic Pulmonary Disease, ACEi = Angiotensin-Converting Enzyme-inhibitor, ARB = Angiotensin II Receptor Blocker, ACF = Acute Circulatory Failure, ARF = Acute Respiratory Failure, AKI = Acute Kidney Injury, ICU = Intensive Care Unit.

| Table S1: Odds for survival at 90 days. |      |              |         |                                   |              |         |
|-----------------------------------------|------|--------------|---------|-----------------------------------|--------------|---------|
| Univariate logistic regression          |      |              |         | Multivariable logistic regression |              |         |
| Variable                                | OR   | 95% CI       | p-value | OR                                | 95% CI       | p-value |
| Immunocompromised                       | 0.21 | 0.01 - 1.07  | 0.135   |                                   |              |         |
| Liver disease                           | 1.67 | 0.08 - 17.65 | 0.678   |                                   |              |         |
| Cancer                                  | 2.32 | 0.75 - 6.64  | 0.123   |                                   |              |         |
| CND                                     | 0.32 | 0.02 - 1.73  | 0.285   |                                   |              |         |
| Current smoker                          | 0.95 | 0.14 - 4.02  | 0.947   |                                   |              |         |
| Gender                                  | 1.15 | 0.66 - 1.99  | 0.611   |                                   |              |         |
| Age                                     | 1.08 | 1.06 - 1.11  | <0.000  | 1.08                              | 1.04 - 1.11  | <0.000  |
| CVD                                     | 2.25 | 1.35 - 3.79  | 0.002   | 0.72                              | 0.33 - 1.53  | 0.396   |
| DM                                      | 0.97 | 0.50 - 1.81  | 0.928   |                                   |              |         |
| Asthma                                  | 0.76 | 0.35 - 1.54  | 0.468   |                                   |              |         |
| CPD                                     | 3.26 | 1.57 - 6.71  | 0.001   | 2.03                              | 0.79 - 5.23  | 0.139   |
| ACEi/ARB                                | 2.54 | 1.45 - 4.45  | 0.001   | 1.94                              | 0.88 - 4.32  | 0.102   |
| ACF                                     | 1.78 | 1.53 - 2.10  | <0.000  | 1.72                              | 1.46 - 2.06  | <0.000  |
| ARF                                     | 1.31 | 0.96 - 2.00  | 0.133   |                                   |              |         |
| <b>AKI at ICU-admission</b>             | 3.90 | 2.31 - 6.67  | <0.000  | 3.14                              | 1.66 - 6.00  | 0.001   |
| (Intercept)                             |      |              |         | 0.00                              | 0.00 - 0.002 | <0.000  |

OR = Odds Ratio, CI = Confidence Interval, CND = Chronic Neurological Disease, CVD = Cardiovascular Disease, DM = Diabetes Mellitus, CPD = Chronic Pulmonary Disease, ACEi = Angiotensin-Converting Enzyme-inhibitor, ARB = Angiotensin II Receptor Blocker, ACF = Acute Circulatory Failure, ARF = Acute Respiratory Failure, AKI = Acute Kidney Injury, ICU = Intensive Care Unit.

**Table S2: Hazard ratio for survival at 30 days.** *Legends:* HR = Hazard Ratio, CI = Confidence Interval, CND = Chronic Neurological Disease, CVD = Cardiovascular Disease, DM = Diabetes Mellitus, CPD = Chronic Pulmonary Disease, ACEi = Angiotensin-Converting Enzyme-inhibitor, ARB = Angiotensin II Receptor Blocker, ACF = Acute Circulatory Failure, ARF = Acute Respiratory Failure, AKI = Acute Kidney Injury, ICU = Intensive Care Unit.

| <b>Table S2: Hazard ratio for survival at 30 days.</b> |       |              |                  |                                     |             |                  |
|--------------------------------------------------------|-------|--------------|------------------|-------------------------------------|-------------|------------------|
| <b>Univariable Cox regression</b>                      |       |              |                  | <b>Multivariable Cox regression</b> |             |                  |
| Variable                                               | HR    | 95% CI       | <i>p</i> -value  | HR                                  | 95% CI      | <i>p</i> -value  |
| Immunocompromised                                      | 0.32  | 0.05 - 2.30  | 0.261            |                                     |             |                  |
| Liver disease                                          | 0.85  | 0.33 - 17.00 | 0.398            |                                     |             |                  |
| Cancer                                                 | 0.97  | 1.10 - 6.20  | <b>0.023</b>     | 2.65                                | 1.11 - 6.36 | <b>0.029</b>     |
| CND                                                    | -0.73 | 0.07 - 3.50  | 0.468            |                                     |             |                  |
| Current smoker                                         | 0.15  | 0.29 - 4.80  | 0.830            |                                     |             |                  |
| Gender                                                 | 0.41  | 0.90 - 2.60  | 0.121            |                                     |             |                  |
| Age                                                    | 0.07  | 1.00 - 1.10  | <b>&lt;0.000</b> | 1.05                                | 1.03 - 1.08 | <b>&lt;0.000</b> |
| CVD                                                    | 0.77  | 1.30 - 3.60  | <b>0.004</b>     | 0.96                                | 0.52 - 1.76 | 0.886            |
| DM                                                     | 0.12  | 0.61 - 2.10  | 0.695            |                                     |             |                  |
| Asthma                                                 | 0.08  | 0.55 - 2.10  | 0.807            |                                     |             |                  |
| CPD                                                    | 1.30  | 2.00 - 6.40  | <b>&lt;0.000</b> | 2.31                                | 1.25 - 4.25 | <b>0.008</b>     |
| ACEi/ARB                                               | 0.63  | 1.10 - 3.20  | <b>0.019</b>     | 1.37                                | 0.75 - 2.50 | 0.311            |
| ACF                                                    | 0.52  | 1.40 - 2.00  | <b>&lt;0.000</b> | 1.56                                | 1.32 - 1.85 | <b>&lt;0.000</b> |
| ARF                                                    | 0.15  | 0.83 - 1.60  | 0.379            |                                     |             |                  |
| <b>AKI at ICU admission</b>                            | 1.30  | 2.30 - 6.30  | <b>&lt;0.000</b> | 2.92                                | 1.74 - 4.90 | <b>&lt;0.000</b> |

HR = Hazard Ratio, CI = Confidence Interval, CND = Chronic Neurological Disease, CVD = Cardiovascular Disease, DM = Diabetes Mellitus, CPD = Chronic Pulmonary Disease, ACEi = Angiotensin-Converting Enzyme-inhibitor, ARB = Angiotensin II Receptor Blocker, ACF = Acute Circulatory Failure, ARF = Acute Respiratory Failure, AKI = Acute Kidney Injury, ICU = Intensive Care Unit.

**Table S3: Hazard ratio for survival at 90 days.** *Legends:* HR = Hazard Ratio, CI = Confidence Interval, CND = Chronic Neurological Disease, CVD = Cardiovascular Disease, DM = Diabetes Mellitus, CPD = Chronic Pulmonary Disease, ACEi = Angiotensin-Converting Enzyme-inhibitor, ARB = Angiotensin II Receptor Blocker, ACF = Acute Circulatory Failure, ARF = Acute Respiratory Failure, AKI = Acute Kidney Injury, ICU = Intensive Care Unit.

| <b>Table S3: Hazard ratio for survival at 90 days.</b> |             |                    |                  |                                     |                    |                  |
|--------------------------------------------------------|-------------|--------------------|------------------|-------------------------------------|--------------------|------------------|
| <b>Univariable Cox regression</b>                      |             |                    |                  | <b>Multivariable Cox regression</b> |                    |                  |
| Variable                                               | HR          | 95% CI             | <i>p</i> -value  | HR                                  | 95% CI             | <i>p</i> -value  |
| Immunocompromised                                      | 0.24        | 0.03 - 1.70        | 0.160            |                                     |                    |                  |
| Liver disease                                          | 1.80        | 0.25 - 13.00       | 0.557            |                                     |                    |                  |
| Cancer                                                 | 2.10        | 0.90 - 4.80        | <b>0.086</b>     | 2.07                                | 0.88 - 4.88        | 0.095            |
| CND                                                    | 0.37        | 0.05 - 2.60        | 0.317            |                                     |                    |                  |
| Current smoker                                         | 0.92        | 0.22 - 3.70        | 0.902            |                                     |                    |                  |
| Gender                                                 | 1.20        | 0.74 - 1.90        | 0.472            |                                     |                    |                  |
| Age                                                    | 1.10        | 1.00 - 1.10        | <b>&lt;0.000</b> | 1.05                                | 1.03 - 1.08        | <b>&lt;0.000</b> |
| CVD                                                    | 2.10        | 1.30 - 3.20        | <b>0.002</b>     | 0.85                                | 0.50 - 1.46        | 0.558            |
| DM                                                     | 0.99        | 0.56 - 1.70        | 0.964            |                                     |                    |                  |
| Asthma                                                 | 0.81        | 0.42 - 1.60        | 0.527            |                                     |                    |                  |
| CPD                                                    | 2.90        | 1.70 - 5.10        | <b>&lt;0.000</b> | 2.09                                | 1.18 - 3.70        | <b>0.012</b>     |
| ACEi/ARB                                               | 2.20        | 1.40 - 3.50        | <b>&lt;0.000</b> | 1.78                                | 1.05 - 3.01        | <b>0.032</b>     |
| ACF                                                    | 1.70        | 1.40 - 1.90        | <b>&lt;0.000</b> | 1.56                                | 1.35 - 1.80        | <b>&lt;0.000</b> |
| ARF                                                    | 1.30        | 0.91 - 1.80        | 0.159            |                                     |                    |                  |
| <b>AKI at ICU admission</b>                            | <b>3.40</b> | <b>2.20 - 5.30</b> | <b>&lt;0.000</b> | <b>2.66</b>                         | <b>1.69 - 4.19</b> | <b>&lt;0.000</b> |

HR = Hazard Ratio, CI = Confidence Interval, CND = Chronic Neurological Disease, CVD = Cardiovascular Disease, DM = Diabetes Mellitus, CPD = Chronic Pulmonary Disease, ACEi = Angiotensin-Converting Enzyme-inhibitor, ARB = Angiotensin II Receptor Blocker, ACF = Acute Circulatory Failure, ARF = Acute Respiratory Failure, AKI = Acute Kidney Injury, ICU = Intensive Care Unit.

**Table S4: Comparison of AKI definitions and staging criteria.** *Legends:* AKI = Acute Kidney Injury, KDIGO = Kidney Disease: Improving Global Outcomes, RIFLE = Risk, Injury, Failure, Loss, End-stage kidney disease, SAPS II = Simplified Acute Physiology Score II, SCr = Serum Creatinine, GFR = Glomerular Filtration Rate, UO = Urine Output, BUN = Blood Urea Nitrogen, RRT = Renal Replacement Therapy, h = hours.

| Table S4: Comparison of AKI definitions and staging criteria. |                                                                                          |                |                                                                                           |                                                                                     |               |            |                |
|---------------------------------------------------------------|------------------------------------------------------------------------------------------|----------------|-------------------------------------------------------------------------------------------|-------------------------------------------------------------------------------------|---------------|------------|----------------|
| KDIGO                                                         |                                                                                          | RIFLE          |                                                                                           |                                                                                     | Renal SAPS II |            |                |
| Stage                                                         | SCr <sup>a</sup>                                                                         | Class          | SCr or GFR                                                                                | UO <sup>b</sup>                                                                     | Score         | UO/24 h    | BUN            |
|                                                               |                                                                                          |                |                                                                                           |                                                                                     | <b>0</b>      | >1000 ml   | <10 mmol/L     |
| <b>1</b>                                                      | 1.5-1.9x baseline<br>or<br>>26.5 µmol/L increase                                         | <b>Risk</b>    | SCr increase 1.5x baseline<br>or<br>eGFR decrease ≥25%                                    | <0.5ml/kg/h for 6 h                                                                 |               |            |                |
| <b>2</b>                                                      | 2.0-2.9x baseline                                                                        | <b>Injury</b>  | SCr increase 2.0x baseline<br>or<br>eGFR decrease ≥50%                                    | <0.5 ml/kg/h for 12 h<br>(<840 ml/24 h <sup>c</sup> )                               | <b>4</b>      | 500-999 ml |                |
|                                                               |                                                                                          |                |                                                                                           |                                                                                     | <b>6</b>      |            | 10-29.9 mmol/L |
| <b>3</b>                                                      | ≥3.0x baseline<br>or<br>≥4 mg/dl (= 353.7 µmol/L)<br>increase<br>or<br>initiation of RRT | <b>Failure</b> | SCr increase ≥3.0x baseline<br>or<br>≥4 mg/dl (= 353.7 µmol/L)<br>or<br>GFR decrease ≥75% | <0.3 ml/kg/h for 24 h<br>(<504 ml/24 h <sup>c</sup> )<br>or<br>anuria for 12 hours. | <b>10</b>     |            | >30 mmol/L     |
|                                                               |                                                                                          |                |                                                                                           |                                                                                     | <b>11</b>     | <500 ml    |                |

<sup>a</sup>SCr-increase within 48 hours.  
<sup>b</sup>UO criteria are shared by KDIGO and RIFLE.  
<sup>c</sup>Standardized for a patient with a weight of 70 kg.

AKI = Acute Kidney Injury, KDIGO: Kidney Disease: Improving Global Outcomes, RIFLE: Risk, Injury, Failure, Loss, End-stage kidney disease, SAPS II = Simplified Acute Physiology Score II, SCr = Serum Creatinine, GFR = Glomerular Filtration Rate, UO = Urine Output, BUN = Blood Urea Nitrogen, RRT = Renal Replacement Therapy, h = hours.

**STROBE Statement**—Checklist of items that should be included in reports of *cohort studies*

For article:

“Acute Kidney Injury in COVID-19 patients in the Intensive Care Unit. Evaluation of risk factors and mortality in a national cohort.”

|                              | Item No | Recommendation                                                                                                                                                                                                                                                                                                         | Page No |
|------------------------------|---------|------------------------------------------------------------------------------------------------------------------------------------------------------------------------------------------------------------------------------------------------------------------------------------------------------------------------|---------|
| <b>Title and abstract</b>    | 1       | (a) Indicate the study’s design with a commonly used term in the title or the abstract<br>(b) Provide in the abstract an informative and balanced summary of what was done and what was found                                                                                                                          | 1-2     |
| <b>Introduction</b>          |         |                                                                                                                                                                                                                                                                                                                        |         |
| Background/rationale         | 2       | Explain the scientific background and rationale for the investigation being reported                                                                                                                                                                                                                                   | 4       |
| Objectives                   | 3       | State specific objectives, including any prespecified hypotheses                                                                                                                                                                                                                                                       | 4       |
| <b>Methods</b>               |         |                                                                                                                                                                                                                                                                                                                        |         |
| Study design                 | 4       | Present key elements of study design early in the paper                                                                                                                                                                                                                                                                | (4-)5   |
| Setting                      | 5       | Describe the setting, locations, and relevant dates, including periods of recruitment, exposure, follow-up, and data collection                                                                                                                                                                                        | 5       |
| Participants                 | 6       | (a) Give the eligibility criteria, and the sources and methods of selection of participants. Describe methods of follow-up<br>(b) For matched studies, give matching criteria and number of exposed and unexposed                                                                                                      | 5       |
| Variables                    | 7       | Clearly define all outcomes, exposures, predictors, potential confounders, and effect modifiers. Give diagnostic criteria, if applicable                                                                                                                                                                               | 5-6     |
| Data sources/<br>measurement | 8*      | For each variable of interest, give sources of data and details of methods of assessment (measurement). Describe comparability of assessment methods if there is more than one group                                                                                                                                   | 6-7     |
| Bias                         | 9       | Describe any efforts to address potential sources of bias                                                                                                                                                                                                                                                              | 5-7     |
| Study size                   | 10      | Explain how the study size was arrived at                                                                                                                                                                                                                                                                              | 5       |
| Quantitative variables       | 11      | Explain how quantitative variables were handled in the analyses. If applicable, describe which groupings were chosen and why                                                                                                                                                                                           | 6-7     |
| Statistical methods          | 12      | (a) Describe all statistical methods, including those used to control for confounding<br>(b) Describe any methods used to examine subgroups and interactions<br>(c) Explain how missing data were addressed<br>(d) If applicable, explain how loss to follow-up was addressed<br>(e) Describe any sensitivity analyses | 6-7     |
| <b>Results</b>               |         |                                                                                                                                                                                                                                                                                                                        |         |
| Participants                 | 13*     | (a) Report numbers of individuals at each stage of study—eg numbers potentially eligible, examined for eligibility, confirmed eligible, included in the study, completing follow-up, and analysed<br>(b) Give reasons for non-participation at each stage<br>(c) Consider use of a flow diagram                        | 8       |
| Descriptive data             | 14*     | (a) Give characteristics of study participants (eg demographic, clinical, social) and information on exposures and potential confounders                                                                                                                                                                               | 8-11    |

|                          |     |                                                                                                                                                                                                                                                                                                                                                                                                               |       |
|--------------------------|-----|---------------------------------------------------------------------------------------------------------------------------------------------------------------------------------------------------------------------------------------------------------------------------------------------------------------------------------------------------------------------------------------------------------------|-------|
|                          |     | (b) Indicate number of participants with missing data for each variable of interest                                                                                                                                                                                                                                                                                                                           |       |
|                          |     | (c) Summarise follow-up time (eg, average and total amount)                                                                                                                                                                                                                                                                                                                                                   |       |
| Outcome data             | 15* | Report numbers of outcome events or summary measures over time                                                                                                                                                                                                                                                                                                                                                | 10-13 |
| Main results             | 16  | (a) Give unadjusted estimates and, if applicable, confounder-adjusted estimates and their precision (eg, 95% confidence interval). Make clear which confounders were adjusted for and why they were included<br>(b) Report category boundaries when continuous variables were categorized<br>(c) If relevant, consider translating estimates of relative risk into absolute risk for a meaningful time period | 11-13 |
| Other analyses           | 17  | Report other analyses done—eg analyses of subgroups and interactions, and sensitivity analyses                                                                                                                                                                                                                                                                                                                | 13    |
| <b>Discussion</b>        |     |                                                                                                                                                                                                                                                                                                                                                                                                               |       |
| Key results              | 18  | Summarise key results with reference to study objectives                                                                                                                                                                                                                                                                                                                                                      | 14    |
| Limitations              | 19  | Discuss limitations of the study, taking into account sources of potential bias or imprecision. Discuss both direction and magnitude of any potential bias                                                                                                                                                                                                                                                    | 14-16 |
| Interpretation           | 20  | Give a cautious overall interpretation of results considering objectives, limitations, multiplicity of analyses, results from similar studies, and other relevant evidence                                                                                                                                                                                                                                    | 14-16 |
| Generalisability         | 21  | Discuss the generalisability (external validity) of the study results                                                                                                                                                                                                                                                                                                                                         | 16    |
| <b>Other information</b> |     |                                                                                                                                                                                                                                                                                                                                                                                                               |       |
| Funding                  | 22  | Give the source of funding and the role of the funders for the present study and, if applicable, for the original study on which the present article is based                                                                                                                                                                                                                                                 | 22    |

\*Give information separately for exposed and unexposed groups.

**Note:** An Explanation and Elaboration article discusses each checklist item and gives methodological background and published examples of transparent reporting. The STROBE checklist is best used in conjunction with this article (freely available on the Web sites of PLoS Medicine at <http://www.plosmedicine.org/>, Annals of Internal Medicine at <http://www.annals.org/>, and Epidemiology at <http://www.epidem.com/>). Information on the STROBE Initiative is available at <http://www.strobe-statement.org>.
