# Supplementary material for: Acute kidney injury in patients with COVID-19 in the intensive care unit: evaluation of risk factors and mortality in a national cohort
Source: PubMed Central journal article supplement — BMJ Open. 2022 Jun 22;12(6):e059046. doi: 10.1136/bmjopen-2021-059046 (PMC9226471; doi:10.1136/bmjopen-2021-059046), 2022-06-22
Supplement: bmjopen-2021-059046supp001.pdf [file bmjopen-2021-059046supp001.pdf]

## SUPPLEMENTARY MATERIAL

**Table S1: Odds for survival at 90 days.** *Legends:* OR = Odds Ratio, CI = Confidence Interval, CND = Chronic Neurological Disease, CVD = Cardiovascular Disease, DM = Diabetes Mellitus, CPD = Chronic Pulmonary Disease, ACEi = Angiotensin-Converting Enzyme-inhibitor, ARB = Angiotensin II Receptor Blocker, ACF = Acute Circulatory Failure, ARF = Acute Respiratory Failure, AKI = Acute Kidney Injury, ICU = Intensive Care Unit.

| Table S1: Odds for survival at 90 days. |      |              |                 |                                   |              |                 |
|-----------------------------------------|------|--------------|-----------------|-----------------------------------|--------------|-----------------|
| Univariate logistic regression          |      |              |                 | Multivariable logistic regression |              |                 |
| Variable                                | OR   | 95% CI       | <i>p</i> -value | OR                                | 95% CI       | <i>p</i> -value |
| Immunocompromised                       | 0.21 | 0.01 - 1.07  | 0.135           |                                   |              |                 |
| Liver disease                           | 1.67 | 0.08 - 17.65 | 0.678           |                                   |              |                 |
| Cancer                                  | 2.32 | 0.75 - 6.64  | 0.123           |                                   |              |                 |
| CND                                     | 0.32 | 0.02 - 1.73  | 0.285           |                                   |              |                 |
| Current smoker                          | 0.95 | 0.14 - 4.02  | 0.947           |                                   |              |                 |
| Gender                                  | 1.15 | 0.66 - 1.99  | 0.611           |                                   |              |                 |
| Age                                     | 1.08 | 1.06 - 1.11  | <0.000          | 1.08                              | 1.04 - 1.11  | <0.000          |
| CVD                                     | 2.25 | 1.35 - 3.79  | 0.002           | 0.72                              | 0.33 - 1.53  | 0.396           |
| DM                                      | 0.97 | 0.50 - 1.81  | 0.928           |                                   |              |                 |
| Asthma                                  | 0.76 | 0.35 - 1.54  | 0.468           |                                   |              |                 |
| CPD                                     | 3.26 | 1.57 - 6.71  | 0.001           | 2.03                              | 0.79 - 5.23  | 0.139           |
| ACEi/ARB                                | 2.54 | 1.45 - 4.45  | 0.001           | 1.94                              | 0.88 - 4.32  | 0.102           |
| ACF                                     | 1.78 | 1.53 - 2.10  | <0.000          | 1.72                              | 1.46 - 2.06  | <0.000          |
| ARF                                     | 1.31 | 0.96 - 2.00  | 0.133           |                                   |              |                 |
| <b>AKI at ICU-admission</b>             | 3.90 | 2.31 - 6.67  | <0.000          | 3.14                              | 1.66 - 6.00  | 0.001           |
| (Intercept)                             |      |              |                 | 0.00                              | 0.00 - 0.002 | <0.000          |

OR = Odds Ratio, CI = Confidence Interval, CND = Chronic Neurological Disease, CVD = Cardiovascular Disease, DM = Diabetes Mellitus, CPD = Chronic Pulmonary Disease, ACEi = Angiotensin-Converting Enzyme-inhibitor, ARB = Angiotensin II Receptor Blocker, ACF = Acute Circulatory Failure, ARF = Acute Respiratory Failure, AKI = Acute Kidney Injury, ICU = Intensive Care Unit.

**Table S2: Hazard ratio for survival at 30 days.** *Legends:* HR = Hazard Ratio, CI = Confidence Interval, CND = Chronic Neurological Disease, CVD = Cardiovascular Disease, DM = Diabetes Mellitus, CPD = Chronic Pulmonary Disease, ACEi = Angiotensin-Converting Enzyme-inhibitor, ARB = Angiotensin II Receptor Blocker, ACF = Acute Circulatory Failure, ARF = Acute Respiratory Failure, AKI = Acute Kidney Injury, ICU = Intensive Care Unit.

| <b>Table S2: Hazard ratio for survival at 30 days.</b> |       |              |                  |                                     |             |                  |
|--------------------------------------------------------|-------|--------------|------------------|-------------------------------------|-------------|------------------|
| <b>Univariable Cox regression</b>                      |       |              |                  | <b>Multivariable Cox regression</b> |             |                  |
| Variable                                               | HR    | 95% CI       | <i>p</i> -value  | HR                                  | 95% CI      | <i>p</i> -value  |
| Immunocompromised                                      | 0.32  | 0.05 - 2.30  | 0.261            |                                     |             |                  |
| Liver disease                                          | 0.85  | 0.33 - 17.00 | 0.398            |                                     |             |                  |
| Cancer                                                 | 0.97  | 1.10 - 6.20  | <b>0.023</b>     | 2.65                                | 1.11 - 6.36 | <b>0.029</b>     |
| CND                                                    | -0.73 | 0.07 - 3.50  | 0.468            |                                     |             |                  |
| Current smoker                                         | 0.15  | 0.29 - 4.80  | 0.830            |                                     |             |                  |
| Gender                                                 | 0.41  | 0.90 - 2.60  | 0.121            |                                     |             |                  |
| Age                                                    | 0.07  | 1.00 - 1.10  | <b>&lt;0.000</b> | 1.05                                | 1.03 - 1.08 | <b>&lt;0.000</b> |
| CVD                                                    | 0.77  | 1.30 - 3.60  | <b>0.004</b>     | 0.96                                | 0.52 - 1.76 | 0.886            |
| DM                                                     | 0.12  | 0.61 - 2.10  | 0.695            |                                     |             |                  |
| Asthma                                                 | 0.08  | 0.55 - 2.10  | 0.807            |                                     |             |                  |
| CPD                                                    | 1.30  | 2.00 - 6.40  | <b>&lt;0.000</b> | 2.31                                | 1.25 - 4.25 | <b>0.008</b>     |
| ACEi/ARB                                               | 0.63  | 1.10 - 3.20  | <b>0.019</b>     | 1.37                                | 0.75 - 2.50 | 0.311            |
| ACF                                                    | 0.52  | 1.40 - 2.00  | <b>&lt;0.000</b> | 1.56                                | 1.32 - 1.85 | <b>&lt;0.000</b> |
| ARF                                                    | 0.15  | 0.83 - 1.60  | 0.379            |                                     |             |                  |
| <b>AKI at ICU admission</b>                            | 1.30  | 2.30 - 6.30  | <b>&lt;0.000</b> | 2.92                                | 1.74 - 4.90 | <b>&lt;0.000</b> |

HR = Hazard Ratio, CI = Confidence Interval, CND = Chronic Neurological Disease, CVD = Cardiovascular Disease, DM = Diabetes Mellitus, CPD = Chronic Pulmonary Disease, ACEi = Angiotensin-Converting Enzyme-inhibitor, ARB = Angiotensin II Receptor Blocker, ACF = Acute Circulatory Failure, ARF = Acute Respiratory Failure, AKI = Acute Kidney Injury, ICU = Intensive Care Unit.

**Table S3: Hazard ratio for survival at 90 days.** *Legends:* HR = Hazard Ratio, CI = Confidence Interval, CND = Chronic Neurological Disease, CVD = Cardiovascular Disease, DM = Diabetes Mellitus, CPD = Chronic Pulmonary Disease, ACEi = Angiotensin-Converting Enzyme-inhibitor, ARB = Angiotensin II Receptor Blocker, ACF = Acute Circulatory Failure, ARF = Acute Respiratory Failure, AKI = Acute Kidney Injury, ICU = Intensive Care Unit.

| Table S3: Hazard ratio for survival at 90 days. |             |                    |                  |                              |                    |                  |
|-------------------------------------------------|-------------|--------------------|------------------|------------------------------|--------------------|------------------|
| Univariable Cox regression                      |             |                    |                  | Multivariable Cox regression |                    |                  |
| Variable                                        | HR          | 95% CI             | p-value          | HR                           | 95% CI             | p-value          |
| Immunocompromised                               | 0.24        | 0.03 - 1.70        | 0.160            |                              |                    |                  |
| Liver disease                                   | 1.80        | 0.25 - 13.00       | 0.557            |                              |                    |                  |
| Cancer                                          | 2.10        | 0.90 - 4.80        | <b>0.086</b>     | 2.07                         | 0.88 - 4.88        | 0.095            |
| CND                                             | 0.37        | 0.05 - 2.60        | 0.317            |                              |                    |                  |
| Current smoker                                  | 0.92        | 0.22 - 3.70        | 0.902            |                              |                    |                  |
| Gender                                          | 1.20        | 0.74 - 1.90        | 0.472            |                              |                    |                  |
| Age                                             | 1.10        | 1.00 - 1.10        | <b>&lt;0.000</b> | 1.05                         | 1.03 - 1.08        | <b>&lt;0.000</b> |
| CVD                                             | 2.10        | 1.30 - 3.20        | <b>0.002</b>     | 0.85                         | 0.50 - 1.46        | 0.558            |
| DM                                              | 0.99        | 0.56 - 1.70        | 0.964            |                              |                    |                  |
| Asthma                                          | 0.81        | 0.42 - 1.60        | 0.527            |                              |                    |                  |
| CPD                                             | 2.90        | 1.70 - 5.10        | <b>&lt;0.000</b> | 2.09                         | 1.18 - 3.70        | <b>0.012</b>     |
| ACEi/ARB                                        | 2.20        | 1.40 - 3.50        | <b>&lt;0.000</b> | 1.78                         | 1.05 - 3.01        | <b>0.032</b>     |
| ACF                                             | 1.70        | 1.40 - 1.90        | <b>&lt;0.000</b> | 1.56                         | 1.35 - 1.80        | <b>&lt;0.000</b> |
| ARF                                             | 1.30        | 0.91 - 1.80        | 0.159            |                              |                    |                  |
| <b>AKI at ICU admission</b>                     | <b>3.40</b> | <b>2.20 - 5.30</b> | <b>&lt;0.000</b> | <b>2.66</b>                  | <b>1.69 - 4.19</b> | <b>&lt;0.000</b> |

HR = Hazard Ratio, CI = Confidence Interval, CND = Chronic Neurological Disease, CVD = Cardiovascular Disease, DM = Diabetes Mellitus, CPD = Chronic Pulmonary Disease, ACEi = Angiotensin-Converting Enzyme-inhibitor, ARB = Angiotensin II Receptor Blocker, ACF = Acute Circulatory Failure, ARF = Acute Respiratory Failure, AKI = Acute Kidney Injury, ICU = Intensive Care Unit.

**Table S4: Comparison of AKI definitions and staging criteria.** *Legends:* AKI = Acute Kidney Injury, KDIGO = Kidney Disease: Improving Global Outcomes, RIFLE = Risk, Injury, Failure, Loss, End-stage kidney disease, SAPS II = Simplified Acute Physiology Score II, SCr = Serum Creatinine, GFR = Glomerular Filtration Rate, UO = Urine Output, BUN = Blood Urea Nitrogen, RRT = Renal Replacement Therapy, h = hours.

| Table S4: Comparison of AKI definitions and staging criteria.                                                                                                                                                                                                                                                                                                                                                                                                                                                              |                                                                                          |         |                                                                                           |                                                                                     |               |            |                |
|----------------------------------------------------------------------------------------------------------------------------------------------------------------------------------------------------------------------------------------------------------------------------------------------------------------------------------------------------------------------------------------------------------------------------------------------------------------------------------------------------------------------------|------------------------------------------------------------------------------------------|---------|-------------------------------------------------------------------------------------------|-------------------------------------------------------------------------------------|---------------|------------|----------------|
| KDIGO                                                                                                                                                                                                                                                                                                                                                                                                                                                                                                                      |                                                                                          | RIFLE   |                                                                                           |                                                                                     | Renal SAPS II |            |                |
| Stage                                                                                                                                                                                                                                                                                                                                                                                                                                                                                                                      | SCr <sup>a</sup>                                                                         | Class   | SCr or GFR                                                                                | UO <sup>b</sup>                                                                     | Score         | UO/24 h    | BUN            |
|                                                                                                                                                                                                                                                                                                                                                                                                                                                                                                                            |                                                                                          |         |                                                                                           |                                                                                     | 0             | >1000 ml   | <10 mmol/L     |
| 1                                                                                                                                                                                                                                                                                                                                                                                                                                                                                                                          | 1.5-1.9x baseline<br>or<br>>26.5 µmol/L increase                                         | Risk    | SCr increase 1.5x baseline<br>or<br>eGFR decrease ≥25%                                    | <0.5ml/kg/h for 6 h                                                                 |               |            |                |
| 2                                                                                                                                                                                                                                                                                                                                                                                                                                                                                                                          | 2.0-2.9x baseline                                                                        | Injury  | SCr increase 2.0x baseline<br>or<br>eGFR decrease ≥50%                                    | <0.5 ml/kg/h for 12 h<br>(<840 ml/24 h <sup>c</sup> )                               | 4             | 500-999 ml |                |
|                                                                                                                                                                                                                                                                                                                                                                                                                                                                                                                            |                                                                                          |         |                                                                                           |                                                                                     | 6             |            | 10-29.9 mmol/L |
| 3                                                                                                                                                                                                                                                                                                                                                                                                                                                                                                                          | ≥3.0x baseline<br>or<br>≥4 mg/dl (= 353.7 µmol/L)<br>increase<br>or<br>initiation of RRT | Failure | SCr increase ≥3.0x baseline<br>or<br>≥4 mg/dl (= 353.7 µmol/L)<br>or<br>GFR decrease ≥75% | <0.3 ml/kg/h for 24 h<br>(<504 ml/24 h <sup>c</sup> )<br>or<br>anuria for 12 hours. | 10            |            | >30 mmol/L     |
|                                                                                                                                                                                                                                                                                                                                                                                                                                                                                                                            |                                                                                          |         |                                                                                           |                                                                                     | 11            | <500 ml    |                |
| <sup>a</sup> SCr-increase within 48 hours.<br><sup>b</sup> UO criteria are shared by KDIGO and RIFLE.<br><sup>c</sup> Standardized for a patient with a weight of 70 kg.<br>AKI = Acute Kidney Injury, KDIGO: Kidney Disease: Improving Global Outcomes, RIFLE: Risk, Injury, Failure, Loss, End-stage kidney disease, SAPS II = Simplified Acute Physiology Score II, SCr = Serum Creatinine, GFR = Glomerular Filtration Rate, UO = Urine Output, BUN = Blood Urea Nitrogen, RRT = Renal Replacement Therapy, h = hours. |                                                                                          |         |                                                                                           |                                                                                     |               |            |                |
